# Supplementary material for: Comprehensive proteomic characterization of urethral stricture disease in the Chinese population
Source: Front Mol Biosci. 2024 Jul 26;11:1401970. doi: 10.3389/fmolb.2024.1401970 (PMC11310122; doi:10.3389/fmolb.2024.1401970)
Supplement: Supplementary file 1 [file Table2.XLSX]

## Sheet: Sheet1
Supplementary Table S2: The identified protein expression in the NATs and scar tissues samples.
Symbol	Normal(01)	Normal(03)	Normal(05)	Normal(07)	Normal(12)	Scar(01)	Scar(02)	Scar(03)	Scar(04)	Scar(05)	Scar(06)	Scar(07)	Scar(08)	Scar(09)	Scar(10)	Scar(11)	Scar(12)
RYR3	0.0003	0.0003	0.0003	0.0003	0.0003	0.0003	0.0003	0.0003	0.0003	0.0003	0.0003	0.0003	0.0003	0.0003	0.0013	0.0003	0.0003
DYNC2H1	0.0003	0.0003	0.0003	0.0003	0.0003	0.0003	0.0003	0.0003	0.0003	0.0003	0.0003	0.0003	0.0003	0.0016	0.0003	0.0003	0.0003
FAT4	0.0003	0.0003	0.0003	0.0003	0.0003	0.0018	0.0003	0.0003	0.0003	0.0003	0.0003	0.0003	0.0003	0.0003	0.0003	0.0003	0.0003
MYH15	0.0003	0.0003	0.0003	0.0003	0.0003	0.0003	0.0003	0.0003	0.0003	0.0003	0.0003	0.0003	0.0003	0.0003	0.0021	0.0003	0.0003
NF1	0.0003	0.0003	0.0003	0.0003	0.0003	0.0003	0.0022	0.0003	0.0003	0.0003	0.0003	0.0003	0.0003	0.0003	0.0003	0.0003	0.0003
DOCK5	0.0003	0.0003	0.0003	0.0003	0.0003	0.0003	0.0003	0.0003	0.0003	0.0003	0.0003	0.0028	0.0003	0.0003	0.0003	0.0003	0.0003
ATM	0.0003	0.0003	0.0003	0.0003	0.0003	0.0003	0.0003	0.0003	0.0003	0.0003	0.0003	0.0003	0.0003	0.0003	0.0003	0.0033	0.0003
UNC79	0.0003	0.0003	0.0003	0.0003	0.0003	0.0003	0.0003	0.0003	0.0003	0.0033	0.0003	0.0003	0.0003	0.0003	0.0003	0.0003	0.0003
LOC100653217	0.0003	0.0003	0.0003	0.0003	0.0003	0.0003	0.0035	0.0003	0.0003	0.0003	0.0003	0.0003	0.0003	0.0003	0.0003	0.0003	0.0003
TRIP11	0.0003	0.0003	0.0003	0.0003	0.0003	0.0003	0.0003	0.0003	0.0003	0.0003	0.0003	0.0003	0.0003	0.0003	0.0003	0.0046	0.0003
LEPREL1	0.0003	0.0003	0.0003	0.0003	0.0003	0.0049	0.0003	0.0003	0.0003	0.0003	0.0003	0.0003	0.0003	0.0003	0.0003	0.0003	0.0003
ARHGEF11	0.0003	0.0003	0.0003	0.0003	0.0003	0.0003	0.0052	0.0003	0.0003	0.0003	0.0003	0.0003	0.0003	0.0003	0.0003	0.0003	0.0003
ARHGAP35	0.0003	0.0003	0.0003	0.0003	0.0003	0.0003	0.0003	0.0003	0.0056	0.0003	0.0003	0.0003	0.0003	0.0003	0.0003	0.0003	0.0003
SHC2	0.0003	0.0003	0.0003	0.0003	0.0003	0.0003	0.0003	0.0003	0.0003	0.0003	0.0003	0.0003	0.0003	0.0003	0.0056	0.0003	0.0003
DOCK9	0.0003	0.0003	0.0003	0.0003	0.0003	0.0057	0.0003	0.0003	0.0003	0.0003	0.0003	0.0003	0.0003	0.0003	0.0003	0.0003	0.0003
CUL9	0.0003	0.0003	0.0003	0.0003	0.0003	0.0003	0.0003	0.0003	0.0003	0.0003	0.0003	0.0003	0.0003	0.0003	0.0003	0.0059	0.0003
NTM	0.0003	0.0003	0.0003	0.0003	0.0003	0.0003	0.0059	0.0003	0.0003	0.0003	0.0003	0.0003	0.0003	0.0003	0.0003	0.0003	0.0003
MEGF6	0.0003	0.0003	0.0003	0.0003	0.0003	0.0003	0.0003	0.0003	0.006	0.0003	0.0003	0.0003	0.0003	0.0003	0.0003	0.0003	0.0003
SHC1	0.0003	0.0003	0.0003	0.0003	0.0003	0.0003	0.0003	0.0003	0.0003	0.0003	0.0003	0.0003	0.0003	0.0003	0.0062	0.0003	0.0003
FZD2	0.0003	0.0003	0.0003	0.0003	0.0003	0.0003	0.0063	0.0003	0.0003	0.0003	0.0003	0.0003	0.0003	0.0003	0.0003	0.0003	0.0003
FZD7	0.0003	0.0003	0.0003	0.0003	0.0003	0.0003	0.0065	0.0003	0.0003	0.0003	0.0003	0.0003	0.0003	0.0003	0.0003	0.0003	0.0003
ZBTB47	0.0003	0.0003	0.0003	0.0003	0.0003	0.0003	0.0067	0.0003	0.0003	0.0003	0.0003	0.0003	0.0003	0.0003	0.0003	0.0003	0.0003
AK9	0.0003	0.0003	0.0003	0.0003	0.0003	0.0003	0.0069	0.0003	0.0003	0.0003	0.0003	0.0003	0.0003	0.0003	0.0003	0.0003	0.0003
RASAL2	0.0003	0.0003	0.0003	0.0003	0.0003	0.0003	0.0023	0.0003	0.0003	0.0003	0.0003	0.0003	0.0003	0.0003	0.005	0.0003	0.0003
SPEG	0.0003	0.0003	0.0003	0.0003	0.0003	0.0003	0.0003	0.0003	0.0003	0.0003	0.0003	0.0003	0.0003	0.0003	0.0073	0.0003	0.0003
DAB2IP	0.0003	0.0003	0.0003	0.0003	0.0003	0.0003	0.0024	0.0003	0.0003	0.0003	0.0003	0.0003	0.0003	0.0003	0.0053	0.0003	0.0003
SYNGAP1	0.0003	0.0003	0.0003	0.0003	0.0003	0.0003	0.0024	0.0003	0.0003	0.0003	0.0003	0.0003	0.0003	0.0003	0.0053	0.0003	0.0003
ANKRD27	0.0003	0.0003	0.0003	0.0003	0.0003	0.0003	0.0003	0.0003	0.0003	0.0003	0.0003	0.0003	0.0003	0.0003	0.008	0.0003	0.0003
TRAPPC8	0.0003	0.0003	0.0003	0.0003	0.0003	0.0003	0.008	0.0003	0.0003	0.0003	0.0003	0.0003	0.0003	0.0003	0.0003	0.0003	0.0003
OBSL1	0.0003	0.0003	0.0003	0.0003	0.0003	0.0003	0.0003	0.0003	0.0003	0.0003	0.0003	0.0003	0.0003	0.0003	0.0083	0.0003	0.0003
CEP164	0.0003	0.0003	0.0003	0.0003	0.0003	0.0003	0.0003	0.0003	0.0084	0.0003	0.0003	0.0003	0.0003	0.0003	0.0003	0.0003	0.0003
KIF27	0.0003	0.0003	0.0003	0.0003	0.0003	0.0003	0.0003	0.0003	0.0003	0.0003	0.0003	0.0003	0.0003	0.0003	0.0003	0.0085	0.0003
SVEP1	0.0003	0.0003	0.0003	0.0003	0.0003	0.0003	0.0003	0.0003	0.0003	0.0003	0.0003	0.0003	0.0003	0.0087	0.0003	0.0003	0.0003
ZBTB33	0.0003	0.0003	0.0003	0.0003	0.0003	0.0003	0.0003	0.0003	0.0003	0.0003	0.0003	0.0003	0.0003	0.0003	0.0094	0.0003	0.0003
ANGPTL5	0.0003	0.0003	0.0003	0.0003	0.0003	0.0003	0.0003	0.0003	0.0096	0.0003	0.0003	0.0003	0.0003	0.0003	0.0003	0.0003	0.0003
PTPN9	0.0003	0.0003	0.0003	0.0003	0.0003	0.0003	0.0102	0.0003	0.0003	0.0003	0.0003	0.0003	0.0003	0.0003	0.0003	0.0003	0.0003
UBR5	0.0003	0.0003	0.0003	0.0003	0.0003	0.0003	0.0003	0.0003	0.0003	0.0003	0.0003	0.0003	0.0003	0.0003	0.0003	0.0104	0.0003
NOS1	0.0003	0.0003	0.0003	0.0003	0.0003	0.0003	0.0113	0.0003	0.0003	0.0003	0.0003	0.0003	0.0003	0.0003	0.0003	0.0003	0.0003
DNAH2	0.0003	0.0003	0.0003	0.0003	0.0003	0.0117	0.0003	0.0003	0.0003	0.0003	0.0003	0.0003	0.0003	0.0003	0.0003	0.0003	0.0003
SIGIRR	0.0003	0.0003	0.0003	0.0003	0.0003	0.0003	0.0118	0.0003	0.0003	0.0003	0.0003	0.0003	0.0003	0.0003	0.0003	0.0003	0.0003
PLEKHA5	0.0003	0.0003	0.0003	0.0003	0.0003	0.0003	0.012	0.0003	0.0003	0.0003	0.0003	0.0003	0.0003	0.0003	0.0003	0.0003	0.0003
PCNT	0.0003	0.0003	0.0003	0.0003	0.0003	0.0003	0.0003	0.0003	0.0003	0.0003	0.0003	0.0003	0.0003	0.0003	0.0003	0.0003	0.0122
ATG2A	0.0003	0.0003	0.0003	0.0003	0.0003	0.0003	0.0003	0.0003	0.0003	0.0003	0.0003	0.0003	0.0066	0.0062	0.0003	0.0003	0.0003
LCT	0.0003	0.0003	0.0003	0.0003	0.0003	0.0003	0.0131	0.0003	0.0003	0.0003	0.0003	0.0003	0.0003	0.0003	0.0003	0.0003	0.0003
SPHKAP	0.0003	0.0003	0.0003	0.0003	0.0003	0.0003	0.0003	0.0003	0.0003	0.0003	0.0137	0.0003	0.0003	0.0003	0.0003	0.0003	0.0003
JAKMIP2	0.0003	0.0003	0.0003	0.0003	0.0003	0.0003	0.0003	0.0003	0.0003	0.0003	0.0003	0.0003	0.0003	0.0003	0.0003	0.0139	0.0003
TCEAL3	0.0003	0.0003	0.0003	0.0003	0.0003	0.0003	0.0003	0.0141	0.0003	0.0003	0.0003	0.0003	0.0003	0.0003	0.0003	0.0003	0.0003
TCEAL5	0.0003	0.0003	0.0003	0.0003	0.0003	0.0003	0.0003	0.0141	0.0003	0.0003	0.0003	0.0003	0.0003	0.0003	0.0003	0.0003	0.0003
WDFY3	0.0003	0.0003	0.0003	0.0003	0.0003	0.0003	0.0003	0.0003	0.0003	0.0003	0.0142	0.0003	0.0003	0.0003	0.0003	0.0003	0.0003
MTMR6	0.0003	0.0003	0.0003	0.0003	0.0003	0.0003	0.0143	0.0003	0.0003	0.0003	0.0003	0.0003	0.0003	0.0003	0.0003	0.0003	0.0003
EPHB1	0.0003	0.0003	0.0003	0.0003	0.0003	0.0003	0.0003	0.0003	0.0003	0.0003	0.0003	0.0003	0.0003	0.0003	0.0003	0.0003	0.0153
IFNAR1	0.0003	0.0003	0.0003	0.0003	0.0003	0.0003	0.0156	0.0003	0.0003	0.0003	0.0003	0.0003	0.0003	0.0003	0.0003	0.0003	0.0003
THSD7A	0.0003	0.0003	0.0003	0.0003	0.0003	0.0003	0.016	0.0003	0.0003	0.0003	0.0003	0.0003	0.0003	0.0003	0.0003	0.0003	0.0003
FCGR1B	0.0003	0.0003	0.0003	0.0003	0.0003	0.0003	0.0003	0.0003	0.0162	0.0003	0.0003	0.0003	0.0003	0.0003	0.0003	0.0003	0.0003
MAGEC3	0.0003	0.0003	0.0003	0.0003	0.0003	0.0003	0.0003	0.0003	0.0003	0.0003	0.0003	0.0003	0.0003	0.0003	0.0003	0.0164	0.0003
MPP5	0.0003	0.0003	0.0003	0.0003	0.0003	0.0003	0.0003	0.0165	0.0003	0.0003	0.0003	0.0003	0.0003	0.0003	0.0003	0.0003	0.0003
DOCK8	0.0003	0.0003	0.0003	0.0003	0.0003	0.0003	0.0003	0.0003	0.0003	0.0003	0.0003	0.0003	0.0003	0.0003	0.0003	0.0166	0.0003
NCAM2	0.0003	0.0003	0.0003	0.0003	0.0003	0.0003	0.0168	0.0003	0.0003	0.0003	0.0003	0.0003	0.0003	0.0003	0.0003	0.0003	0.0003
VIPAS39	0.0003	0.0003	0.0003	0.0003	0.0003	0.0172	0.0003	0.0003	0.0003	0.0003	0.0003	0.0003	0.0003	0.0003	0.0003	0.0003	0.0003
THUMPD3	0.0003	0.0003	0.0003	0.0003	0.0003	0.0003	0.0003	0.0003	0.0003	0.0003	0.0003	0.0003	0.0003	0.0003	0.0003	0.0173	0.0003
BNIP2	0.0003	0.0003	0.0003	0.0003	0.0003	0.0003	0.0174	0.0003	0.0003	0.0003	0.0003	0.0003	0.0003	0.0003	0.0003	0.0003	0.0003
CHST12	0.0003	0.0003	0.0003	0.0003	0.0003	0.0003	0.0003	0.0003	0.0003	0.0003	0.0003	0.0174	0.0003	0.0003	0.0003	0.0003	0.0003
MAP6	0.0003	0.0003	0.0003	0.0003	0.0003	0.0003	0.0175	0.0003	0.0003	0.0003	0.0003	0.0003	0.0003	0.0003	0.0003	0.0003	0.0003
OTUD7A	0.0003	0.0003	0.0003	0.0003	0.0003	0.0003	0.0003	0.0003	0.0179	0.0003	0.0003	0.0003	0.0003	0.0003	0.0003	0.0003	0.0003
TRIM55	0.0003	0.0003	0.0003	0.0003	0.0003	0.0003	0.0003	0.0003	0.0003	0.0003	0.0003	0.0003	0.0003	0.0003	0.0179	0.0003	0.0003
TRIM54	0.0003	0.0003	0.0003	0.0003	0.0003	0.0003	0.0003	0.0003	0.0003	0.0003	0.0003	0.0003	0.0003	0.0003	0.0181	0.0003	0.0003
RYR2	0.0003	0.0003	0.0003	0.0003	0.0003	0.0003	0.0003	0.0003	0.0003	0.0003	0.0003	0.0003	0.0003	0.018	0.0012	0.0003	0.0003
SMTNL2	0.0003	0.0003	0.0003	0.0003	0.0003	0.0003	0.0003	0.0003	0.0003	0.0003	0.0003	0.0003	0.0003	0.0003	0.019	0.0003	0.0003
TRIM63	0.0003	0.0003	0.0003	0.0003	0.0003	0.0003	0.0003	0.0003	0.0003	0.0003	0.0003	0.0003	0.0003	0.0003	0.019	0.0003	0.0003
ASPM	0.0003	0.0003	0.0003	0.0003	0.0003	0.0003	0.0003	0.0003	0.0003	0.0003	0.0003	0.0003	0.0003	0.0077	0.0003	0.0121	0.0003
RANBP17	0.0003	0.0003	0.0003	0.0003	0.0003	0.0003	0.0003	0.0003	0.0003	0.0003	0.0003	0.0003	0.0003	0.0003	0.0003	0.0197	0.0003
TOP3B	0.0003	0.0003	0.0003	0.0003	0.0003	0.0003	0.0003	0.0003	0.0003	0.0003	0.0003	0.0003	0.0003	0.0003	0.0003	0.0003	0.0197
ETV3	0.0003	0.0003	0.0003	0.0003	0.0003	0.0003	0.0003	0.0198	0.0003	0.0003	0.0003	0.0003	0.0003	0.0003	0.0003	0.0003	0.0003
ATCAY	0.0003	0.0003	0.0003	0.0003	0.0003	0.0003	0.0205	0.0003	0.0003	0.0003	0.0003	0.0003	0.0003	0.0003	0.0003	0.0003	0.0003
LTBP3	0.0003	0.0003	0.0003	0.0003	0.0003	0.0003	0.0003	0.0003	0.0003	0.0205	0.0003	0.0003	0.0003	0.0003	0.0003	0.0003	0.0003
TEX2	0.0003	0.0003	0.0003	0.0003	0.0003	0.0205	0.0003	0.0003	0.0003	0.0003	0.0003	0.0003	0.0003	0.0003	0.0003	0.0003	0.0003
RMND5A	0.0003	0.0003	0.0003	0.0003	0.0003	0.0003	0.0003	0.0003	0.0003	0.0003	0.0003	0.0003	0.0003	0.0003	0.0215	0.0003	0.0003
AMPD1	0.0003	0.0003	0.0003	0.0003	0.0003	0.0003	0.0003	0.0003	0.0003	0.0003	0.0003	0.0003	0.0003	0.0003	0.0228	0.0003	0.0003
CUL7	0.0003	0.0003	0.0003	0.0003	0.0003	0.0003	0.0003	0.0003	0.0003	0.0003	0.0003	0.0003	0.0003	0.0003	0.0003	0.0087	0.0144
NBPF10	0.0003	0.0003	0.0003	0.0003	0.0003	0.0229	0.0003	0.0003	0.0003	0.0003	0.0003	0.0003	0.0003	0.0003	0.0003	0.0003	0.0003
DGKE	0.0003	0.0003	0.0003	0.0003	0.0003	0.0003	0.0003	0.0003	0.0003	0.0003	0.0003	0.0003	0.023	0.0003	0.0003	0.0003	0.0003
WWP1	0.0003	0.0003	0.0003	0.0003	0.0003	0.0235	0.0003	0.0003	0.0003	0.0003	0.0003	0.0003	0.0003	0.0003	0.0003	0.0003	0.0003
FGD4	0.0003	0.0003	0.0003	0.0003	0.0003	0.0003	0.0003	0.0236	0.0003	0.0003	0.0003	0.0003	0.0003	0.0003	0.0003	0.0003	0.0003
SLC33A1	0.0003	0.0003	0.0003	0.0003	0.0003	0.0003	0.0237	0.0003	0.0003	0.0003	0.0003	0.0003	0.0003	0.0003	0.0003	0.0003	0.0003
LOC100508736	0.0003	0.0003	0.0003	0.0003	0.0003	0.0003	0.0003	0.0003	0.0003	0.0003	0.0003	0.0003	0.0003	0.0238	0.0003	0.0003	0.0003
NPR1	0.0003	0.0003	0.0003	0.0003	0.0003	0.0003	0.0003	0.0003	0.0003	0.0003	0.0003	0.0003	0.0003	0.0003	0.0003	0.0238	0.0003
PRPF39	0.0003	0.0003	0.0003	0.0003	0.0003	0.0003	0.0003	0.0003	0.0003	0.0003	0.0003	0.0003	0.0003	0.0003	0.0003	0.0245	0.0003
PLCL2	0.0003	0.0003	0.0003	0.0003	0.0003	0.0003	0.0003	0.0003	0.0003	0.0003	0.0003	0.0003	0.0003	0.0003	0.0003	0.0246	0.0003
ITCH	0.0003	0.0003	0.0003	0.0003	0.0003	0.025	0.0003	0.0003	0.0003	0.0003	0.0003	0.0003	0.0003	0.0003	0.0003	0.0003	0.0003
ZCCHC11	0.0003	0.0003	0.0003	0.0003	0.0003	0.0003	0.0003	0.0003	0.0003	0.0003	0.0003	0.0003	0.025	0.0003	0.0003	0.0003	0.0003
HGF	0.0003	0.0003	0.0003	0.0003	0.0003	0.0003	0.0003	0.0003	0.0003	0.0003	0.0003	0.0003	0.0003	0.0003	0.0252	0.0003	0.0003
CRADD	0.0003	0.0003	0.0003	0.0003	0.0003	0.0003	0.0003	0.0256	0.0003	0.0003	0.0003	0.0003	0.0003	0.0003	0.0003	0.0003	0.0003
SYN1	0.0003	0.0003	0.0003	0.0003	0.0003	0.0003	0.026	0.0003	0.0003	0.0003	0.0003	0.0003	0.0003	0.0003	0.0003	0.0003	0.0003
IFRD2	0.0003	0.0003	0.0003	0.0003	0.0003	0.0003	0.0261	0.0003	0.0003	0.0003	0.0003	0.0003	0.0003	0.0003	0.0003	0.0003	0.0003
NBPF12	0.0003	0.0003	0.0003	0.0003	0.0003	0.0265	0.0003	0.0003	0.0003	0.0003	0.0003	0.0003	0.0003	0.0003	0.0003	0.0003	0.0003
NBPF14	0.0003	0.0003	0.0003	0.0003	0.0003	0.0265	0.0003	0.0003	0.0003	0.0003	0.0003	0.0003	0.0003	0.0003	0.0003	0.0003	0.0003
DPCD	0.0003	0.0003	0.0003	0.0003	0.0003	0.0003	0.0003	0.0003	0.0003	0.0003	0.0003	0.0003	0.0003	0.0003	0.027	0.0003	0.0003
NBPF1	0.0003	0.0003	0.0003	0.0003	0.0003	0.0271	0.0003	0.0003	0.0003	0.0003	0.0003	0.0003	0.0003	0.0003	0.0003	0.0003	0.0003
PAM	0.0003	0.0003	0.0003	0.0003	0.0003	0.0003	0.0273	0.0003	0.0003	0.0003	0.0003	0.0003	0.0003	0.0003	0.0003	0.0003	0.0003
MDM1	0.0003	0.0003	0.0003	0.0003	0.0003	0.0003	0.0003	0.0003	0.0003	0.0003	0.0003	0.0003	0.0274	0.0003	0.0003	0.0003	0.0003
TMEM161A	0.0003	0.0003	0.0003	0.0003	0.0003	0.0003	0.0003	0.0003	0.0003	0.0003	0.0003	0.0003	0.0003	0.0003	0.0276	0.0003	0.0003
VAV1	0.0003	0.0003	0.0003	0.0003	0.0003	0.0003	0.0003	0.0003	0.0003	0.0003	0.0003	0.0003	0.0003	0.0003	0.0003	0.0281	0.0003
PARP14	0.0003	0.0003	0.0003	0.0003	0.0003	0.0003	0.0003	0.0003	0.0003	0.0003	0.0003	0.0003	0.0003	0.0003	0.0003	0.0139	0.0148
VPS11	0.0003	0.0003	0.0003	0.0003	0.0003	0.0003	0.0076	0.0003	0.0003	0.0003	0.0003	0.0003	0.0003	0.0212	0.0003	0.0003	0.0003
SUGP2	0.0003	0.0003	0.0003	0.0003	0.0003	0.0287	0.0003	0.0003	0.0003	0.0003	0.0003	0.0003	0.0003	0.0003	0.0003	0.0003	0.0003
NBPF9	0.0003	0.0003	0.0003	0.0003	0.0003	0.0288	0.0003	0.0003	0.0003	0.0003	0.0003	0.0003	0.0003	0.0003	0.0003	0.0003	0.0003
ZNF615	0.0003	0.0003	0.0003	0.0003	0.0003	0.0289	0.0003	0.0003	0.0003	0.0003	0.0003	0.0003	0.0003	0.0003	0.0003	0.0003	0.0003
GP5	0.0003	0.0003	0.0003	0.0003	0.0003	0.0003	0.0003	0.0003	0.0003	0.0003	0.0003	0.029	0.0003	0.0003	0.0003	0.0003	0.0003
MAU2	0.0003	0.0003	0.0003	0.0003	0.0003	0.0003	0.0003	0.0003	0.0003	0.0003	0.0003	0.0003	0.0003	0.0003	0.0003	0.0003	0.0291
NBPF8	0.0003	0.0003	0.0003	0.0003	0.0003	0.0292	0.0003	0.0003	0.0003	0.0003	0.0003	0.0003	0.0003	0.0003	0.0003	0.0003	0.0003
CAMK1D	0.0003	0.0003	0.0003	0.0003	0.0003	0.0294	0.0003	0.0003	0.0003	0.0003	0.0003	0.0003	0.0003	0.0003	0.0003	0.0003	0.0003
C1orf127	0.0003	0.0003	0.0003	0.0003	0.0003	0.0003	0.0003	0.0003	0.0003	0.0003	0.0003	0.0003	0.0003	0.0003	0.0003	0.0003	0.0295
C21orf2	0.0003	0.0003	0.0003	0.0003	0.0003	0.0003	0.0003	0.0003	0.0003	0.0003	0.0003	0.0003	0.0003	0.0299	0.0003	0.0003	0.0003
TBC1D13	0.0003	0.0003	0.0003	0.0003	0.0003	0.0003	0.0003	0.0003	0.0003	0.0003	0.0003	0.0003	0.0003	0.0003	0.03	0.0003	0.0003
CCDC51	0.0003	0.0003	0.0003	0.0003	0.0003	0.0301	0.0003	0.0003	0.0003	0.0003	0.0003	0.0003	0.0003	0.0003	0.0003	0.0003	0.0003
ZC3H11A	0.0003	0.0003	0.0003	0.0003	0.0003	0.0003	0.0003	0.0003	0.0003	0.0003	0.0003	0.0003	0.0003	0.0003	0.0003	0.0003	0.0303
LRRC39	0.0003	0.0003	0.0003	0.0003	0.0003	0.0003	0.0003	0.0003	0.0003	0.0003	0.0003	0.0003	0.0003	0.0003	0.0003	0.0308	0.0003
TBC1D24	0.0003	0.0003	0.0003	0.0003	0.0003	0.0003	0.0003	0.0003	0.0003	0.0003	0.0003	0.0003	0.0003	0.0003	0.0003	0.0308	0.0003
DHX38	0.0003	0.0003	0.0003	0.0003	0.0003	0.0003	0.0003	0.0003	0.0003	0.0003	0.0003	0.0003	0.0003	0.0003	0.0003	0.0003	0.0309
ZNF469	0.0003	0.0003	0.0003	0.0003	0.0003	0.0003	0.0003	0.0003	0.031	0.0003	0.0003	0.0003	0.0003	0.0003	0.0003	0.0003	0.0003
CFTR	0.0003	0.0003	0.0003	0.0003	0.0003	0.0003	0.0003	0.0312	0.0003	0.0003	0.0003	0.0003	0.0003	0.0003	0.0003	0.0003	0.0003
NBPF11	0.0003	0.0003	0.0003	0.0003	0.0003	0.0315	0.0003	0.0003	0.0003	0.0003	0.0003	0.0003	0.0003	0.0003	0.0003	0.0003	0.0003
LOC101060362	0.0003	0.0003	0.0003	0.0003	0.0003	0.0321	0.0003	0.0003	0.0003	0.0003	0.0003	0.0003	0.0003	0.0003	0.0003	0.0003	0.0003
SMC4	0.0003	0.0003	0.0003	0.0003	0.0003	0.0003	0.0322	0.0003	0.0003	0.0003	0.0003	0.0003	0.0003	0.0003	0.0003	0.0003	0.0003
MAN2B2	0.0003	0.0003	0.0003	0.0003	0.0003	0.0003	0.0003	0.0003	0.0003	0.0003	0.0003	0.0003	0.0003	0.0323	0.0003	0.0003	0.0003
LOC101059961	0.0003	0.0003	0.0003	0.0003	0.0003	0.0325	0.0003	0.0003	0.0003	0.0003	0.0003	0.0003	0.0003	0.0003	0.0003	0.0003	0.0003
ARHGEF10	0.0003	0.0003	0.0003	0.0003	0.0003	0.0003	0.0003	0.0003	0.0003	0.0003	0.0003	0.0003	0.0003	0.0003	0.0003	0.0003	0.0329
LOC101060202	0.0003	0.0003	0.0003	0.0003	0.0003	0.0331	0.0003	0.0003	0.0003	0.0003	0.0003	0.0003	0.0003	0.0003	0.0003	0.0003	0.0003
RALGAPB	0.0003	0.0003	0.0003	0.0003	0.0003	0.0003	0.0003	0.0003	0.0003	0.0003	0.0003	0.0003	0.0003	0.0003	0.0331	0.0003	0.0003
LOC101060226	0.0003	0.0003	0.0003	0.0003	0.0003	0.0333	0.0003	0.0003	0.0003	0.0003	0.0003	0.0003	0.0003	0.0003	0.0003	0.0003	0.0003
LOC101060684	0.0003	0.0003	0.0003	0.0003	0.0003	0.0333	0.0003	0.0003	0.0003	0.0003	0.0003	0.0003	0.0003	0.0003	0.0003	0.0003	0.0003
MID1	0.0003	0.0003	0.0003	0.0003	0.0003	0.0003	0.0337	0.0003	0.0003	0.0003	0.0003	0.0003	0.0003	0.0003	0.0003	0.0003	0.0003
DNAJB7	0.0003	0.0003	0.0003	0.0003	0.0003	0.0003	0.0003	0.0003	0.0003	0.0003	0.0003	0.0338	0.0003	0.0003	0.0003	0.0003	0.0003
ADAD2	0.0003	0.0003	0.0003	0.0003	0.0003	0.0003	0.0003	0.0339	0.0003	0.0003	0.0003	0.0003	0.0003	0.0003	0.0003	0.0003	0.0003
NT5C1B-RDH14	0.0003	0.0003	0.0003	0.0003	0.0003	0.0003	0.0163	0.018	0.0003	0.0003	0.0003	0.0003	0.0003	0.0003	0.0003	0.0003	0.0003
RUSC2	0.0003	0.0003	0.0003	0.0003	0.0003	0.0003	0.0003	0.0003	0.0003	0.0003	0.0003	0.0003	0.0003	0.0003	0.0003	0.034	0.0003
XIRP2	0.0003	0.0003	0.0003	0.0003	0.0003	0.0003	0.0003	0.0003	0.0003	0.0003	0.0003	0.034	0.0003	0.0003	0.0003	0.0003	0.0003
NBPF24	0.0003	0.0003	0.0003	0.0003	0.0003	0.0343	0.0003	0.0003	0.0003	0.0003	0.0003	0.0003	0.0003	0.0003	0.0003	0.0003	0.0003
GDAP2	0.0003	0.0003	0.0003	0.0003	0.0003	0.0003	0.0003	0.0003	0.0003	0.0003	0.0003	0.0003	0.0003	0.0003	0.0003	0.0347	0.0003
PRX	0.0003	0.0003	0.0003	0.0003	0.0003	0.0003	0.0003	0.0003	0.0003	0.0003	0.0003	0.0003	0.0003	0.0003	0.0003	0.0356	0.0003
SOWAHB	0.0003	0.0003	0.0003	0.0003	0.0003	0.0003	0.0003	0.0003	0.0357	0.0003	0.0003	0.0003	0.0003	0.0003	0.0003	0.0003	0.0003
LMOD2	0.0003	0.0003	0.0003	0.0003	0.0003	0.0003	0.0003	0.0003	0.0003	0.0003	0.0003	0.0003	0.0003	0.0003	0.0358	0.0003	0.0003
CSNK1G3	0.0003	0.0003	0.0003	0.0003	0.0003	0.0003	0.0003	0.0003	0.0003	0.0003	0.0003	0.0003	0.0003	0.013	0.0232	0.0003	0.0003
CSTF3	0.0003	0.0003	0.0003	0.0003	0.0003	0.0003	0.0003	0.0003	0.0003	0.0003	0.0003	0.0003	0.0003	0.0003	0.0003	0.0003	0.036
CENPE	0.0003	0.0003	0.0003	0.0003	0.0003	0.0361	0.0003	0.0003	0.0003	0.0003	0.0003	0.0003	0.0003	0.0003	0.0003	0.0003	0.0003
CSNK1G2	0.0003	0.0003	0.0003	0.0003	0.0003	0.0003	0.0003	0.0003	0.0003	0.0003	0.0003	0.0003	0.0003	0.0131	0.0234	0.0003	0.0003
GLB1L	0.0003	0.0003	0.0003	0.0003	0.0003	0.0003	0.0003	0.0003	0.0003	0.0003	0.0003	0.0003	0.0363	0.0003	0.0003	0.0003	0.0003
MYO7B	0.0003	0.0003	0.0003	0.0003	0.0003	0.0003	0.0003	0.0003	0.0003	0.0003	0.0003	0.0003	0.0003	0.0003	0.0003	0.0363	0.0003
PPFIA3	0.0003	0.0003	0.0003	0.0003	0.0003	0.0003	0.0003	0.0363	0.0003	0.0003	0.0003	0.0003	0.0003	0.0003	0.0003	0.0003	0.0003
INSR	0.0003	0.0003	0.0003	0.0003	0.0003	0.0003	0.0003	0.0003	0.0003	0.0003	0.0003	0.0003	0.0003	0.0003	0.0365	0.0003	0.0003
PRR11	0.0003	0.0003	0.0003	0.0003	0.0003	0.0003	0.0003	0.0003	0.0003	0.0369	0.0003	0.0003	0.0003	0.0003	0.0003	0.0003	0.0003
TAGLN3	0.0003	0.0003	0.0003	0.0003	0.0003	0.0179	0.0061	0.0137	0.0003	0.0003	0.0003	0.0003	0.0003	0.0003	0.0003	0.0003	0.0003
LOC391322	0.0003	0.0003	0.0003	0.0003	0.0003	0.0003	0.038	0.0003	0.0003	0.0003	0.0003	0.0003	0.0003	0.0003	0.0003	0.0003	0.0003
RSF1	0.0003	0.0003	0.0003	0.0003	0.0003	0.0003	0.0138	0.0003	0.0003	0.0003	0.0003	0.0003	0.0003	0.0003	0.0254	0.0003	0.0003
IGFN1	0.0003	0.0003	0.0003	0.0003	0.0003	0.0003	0.0003	0.0003	0.0003	0.0003	0.0003	0.0003	0.0018	0.0003	0.0376	0.0003	0.0003
FAM63A	0.0003	0.0003	0.0003	0.0003	0.0003	0.0003	0.0003	0.0003	0.0003	0.0003	0.0003	0.0003	0.0003	0.0399	0.0003	0.0003	0.0003
STRIP2	0.0003	0.0003	0.0003	0.0003	0.0003	0.0003	0.0003	0.0003	0.0003	0.0003	0.04	0.0003	0.0003	0.0003	0.0003	0.0003	0.0003
HEPH	0.0003	0.0003	0.0003	0.0003	0.0003	0.0003	0.0003	0.0003	0.0003	0.0003	0.0003	0.0003	0.0003	0.0003	0.0003	0.0003	0.0403
TPST2	0.0003	0.0003	0.0003	0.0003	0.0003	0.0003	0.0003	0.0003	0.0003	0.0003	0.0003	0.0003	0.0003	0.0003	0.0003	0.0403	0.0003
DPYSL5	0.0003	0.0003	0.0003	0.0003	0.0003	0.0003	0.0405	0.0003	0.0003	0.0003	0.0003	0.0003	0.0003	0.0003	0.0003	0.0003	0.0003
RGL2	0.0003	0.0003	0.0003	0.0003	0.0003	0.0003	0.017	0.0003	0.0003	0.0003	0.0003	0.0241	0.0003	0.0003	0.0003	0.0003	0.0003
DSCAM	0.0003	0.0003	0.0003	0.0003	0.0003	0.0003	0.0003	0.0003	0.0003	0.0003	0.0417	0.0003	0.0003	0.0003	0.0003	0.0003	0.0003
NBPF15	0.0003	0.0003	0.0003	0.0003	0.0003	0.0417	0.0003	0.0003	0.0003	0.0003	0.0003	0.0003	0.0003	0.0003	0.0003	0.0003	0.0003
NBPF16	0.0003	0.0003	0.0003	0.0003	0.0003	0.0417	0.0003	0.0003	0.0003	0.0003	0.0003	0.0003	0.0003	0.0003	0.0003	0.0003	0.0003
ANKRD1	0.0003	0.0003	0.0003	0.0003	0.0003	0.0003	0.0003	0.0003	0.0003	0.0003	0.0003	0.0003	0.0003	0.0003	0.0421	0.0003	0.0003
TRIM9	0.0003	0.0003	0.0003	0.0003	0.0003	0.0003	0.0003	0.0003	0.0003	0.0003	0.0003	0.0003	0.0003	0.0421	0.0003	0.0003	0.0003
TEP1	0.0003	0.0003	0.0003	0.0003	0.0003	0.0003	0.0003	0.0003	0.0003	0.0003	0.0425	0.0003	0.0003	0.0003	0.0003	0.0003	0.0003
TSPAN15	0.0003	0.0003	0.0003	0.0003	0.0003	0.0003	0.0426	0.0003	0.0003	0.0003	0.0003	0.0003	0.0003	0.0003	0.0003	0.0003	0.0003
CNTN4	0.0003	0.0003	0.0003	0.0003	0.0003	0.0003	0.0003	0.0003	0.0003	0.0003	0.0003	0.0003	0.0003	0.0003	0.0003	0.0125	0.0309
CACNB2	0.0003	0.0003	0.0003	0.0003	0.0003	0.0003	0.0003	0.0003	0.0032	0.0003	0.0003	0.0003	0.008	0.0003	0.0201	0.0128	0.0003
SF3A2	0.0003	0.0003	0.0003	0.0003	0.0003	0.0003	0.0003	0.0003	0.0003	0.0003	0.0003	0.0003	0.0003	0.0166	0.0285	0.0003	0.0003
FGFR1OP	0.0003	0.0003	0.0003	0.0003	0.0003	0.0003	0.0003	0.0003	0.0003	0.0003	0.0003	0.0003	0.0003	0.0003	0.0459	0.0003	0.0003
SLC12A9	0.0003	0.0003	0.0003	0.0003	0.0003	0.0003	0.0003	0.0003	0.0003	0.0003	0.0003	0.0102	0.0003	0.0003	0.0003	0.0003	0.0361
QRICH2	0.0003	0.0003	0.0003	0.0003	0.0003	0.0003	0.0003	0.0003	0.0003	0.0003	0.0003	0.0003	0.0003	0.0462	0.0003	0.0003	0.0003
TCN2	0.0003	0.0003	0.0003	0.0003	0.0003	0.0003	0.0003	0.0003	0.0003	0.0003	0.0003	0.0003	0.0003	0.0003	0.0003	0.0464	0.0003
ADH4	0.0003	0.0003	0.0003	0.0003	0.0003	0.0003	0.0003	0.0465	0.0003	0.0003	0.0003	0.0003	0.0003	0.0003	0.0003	0.0003	0.0003
SRGAP1	0.0003	0.0003	0.0003	0.0003	0.0003	0.0003	0.0062	0.0003	0.0003	0.0003	0.0003	0.0003	0.0003	0.0079	0.0003	0.0335	0.0003
SLC41A3	0.0003	0.0003	0.0003	0.0003	0.0003	0.0472	0.0003	0.0003	0.0003	0.0003	0.0003	0.0003	0.0003	0.0003	0.0003	0.0003	0.0003
SACS	0.0003	0.0003	0.0003	0.0003	0.0003	0.0003	0.0003	0.0003	0.0003	0.0003	0.0003	0.0003	0.0003	0.0003	0.0024	0.046	0.0003
FCGR1A	0.0003	0.0003	0.0003	0.0003	0.0003	0.0003	0.0003	0.0003	0.0108	0.0003	0.0003	0.0003	0.0003	0.0003	0.0003	0.0003	0.0377
ABCC10	0.0003	0.0003	0.0003	0.0003	0.0003	0.0003	0.0003	0.0003	0.0003	0.0003	0.0003	0.0003	0.0003	0.0003	0.0003	0.0486	0.0003
SLC37A3	0.0003	0.0003	0.0003	0.0003	0.0003	0.0003	0.0003	0.0003	0.0003	0.0003	0.0003	0.0003	0.0003	0.0003	0.0003	0.0495	0.0003
TMLHE	0.0003	0.0003	0.0003	0.0003	0.0003	0.0003	0.0279	0.0003	0.0231	0.0003	0.0003	0.0003	0.0003	0.0003	0.0003	0.0003	0.0003
CACNB4	0.0003	0.0003	0.0003	0.0003	0.0003	0.0003	0.0003	0.0003	0.0038	0.0003	0.0003	0.0003	0.0095	0.0003	0.0239	0.0152	0.0003
FGF2	0.0003	0.0003	0.0003	0.0003	0.0003	0.0003	0.0003	0.0517	0.0003	0.0003	0.0003	0.0003	0.0003	0.0003	0.0003	0.0003	0.0003
C17orf75	0.0003	0.0003	0.0003	0.0003	0.0003	0.0003	0.0003	0.0003	0.0003	0.0003	0.0003	0.0003	0.0003	0.0003	0.0003	0.0003	0.0518
RNF130	0.0003	0.0003	0.0003	0.0003	0.0003	0.0003	0.0003	0.0003	0.0003	0.0003	0.0003	0.0003	0.0003	0.0003	0.0003	0.0522	0.0003
SRGAP2	0.0003	0.0003	0.0003	0.0003	0.0003	0.0003	0.0069	0.0003	0.0003	0.0003	0.0003	0.0003	0.0003	0.0088	0.0003	0.0373	0.0003
FRMPD3	0.0003	0.0003	0.0003	0.0003	0.0003	0.0003	0.0003	0.0003	0.0003	0.0003	0.0003	0.0525	0.0003	0.0003	0.0003	0.0003	0.0003
CACNB1	0.0003	0.0003	0.0003	0.0003	0.0003	0.0003	0.0003	0.0003	0.0039	0.0003	0.0003	0.0003	0.0097	0.0003	0.0245	0.0156	0.0003
EFR3A	0.0003	0.0003	0.0003	0.0003	0.0003	0.0003	0.0003	0.0003	0.0003	0.0003	0.0003	0.0003	0.0003	0.0003	0.0528	0.0003	0.0003
VCAM1	0.0003	0.0003	0.0003	0.0003	0.0003	0.0003	0.0003	0.0003	0.0003	0.0003	0.0003	0.0003	0.0003	0.0547	0.0003	0.0003	0.0003
CACNB3	0.0003	0.0003	0.0003	0.0003	0.0003	0.0003	0.0003	0.0003	0.0041	0.0003	0.0003	0.0003	0.0101	0.0003	0.0255	0.0162	0.0003
CDK5RAP2	0.0003	0.0003	0.0003	0.0003	0.0003	0.0003	0.0003	0.0003	0.0003	0.0003	0.0003	0.0065	0.0003	0.0492	0.0003	0.0003	0.0003
TXLNB	0.0003	0.0003	0.0003	0.0003	0.0003	0.0003	0.0003	0.0003	0.0003	0.0003	0.0003	0.0003	0.0003	0.0003	0.0555	0.0003	0.0003
BIRC6	0.0003	0.0003	0.0003	0.0003	0.0003	0.0003	0.0003	0.0003	0.0003	0.0003	0.0557	0.0003	0.0003	0.0003	0.0003	0.0003	0.0003
PIN4	0.0003	0.0003	0.0003	0.0003	0.0003	0.0003	0.0562	0.0003	0.0003	0.0003	0.0003	0.0003	0.0003	0.0003	0.0003	0.0003	0.0003
UCN	0.0003	0.0003	0.0003	0.0003	0.0003	0.0003	0.0003	0.0003	0.0003	0.0003	0.0564	0.0003	0.0003	0.0003	0.0003	0.0003	0.0003
ZNF322	0.0003	0.0003	0.0003	0.0003	0.0003	0.0571	0.0003	0.0003	0.0003	0.0003	0.0003	0.0003	0.0003	0.0003	0.0003	0.0003	0.0003
HMHA1	0.0003	0.0003	0.0003	0.0003	0.0003	0.0578	0.0003	0.0003	0.0003	0.0003	0.0003	0.0003	0.0003	0.0003	0.0003	0.0003	0.0003
HMMR	0.0003	0.0003	0.0003	0.0003	0.0003	0.0003	0.0003	0.0581	0.0003	0.0003	0.0003	0.0003	0.0003	0.0003	0.0003	0.0003	0.0003
GALNT16	0.0003	0.0003	0.0003	0.0003	0.0003	0.0003	0.0003	0.0582	0.0003	0.0003	0.0003	0.0003	0.0003	0.0003	0.0003	0.0003	0.0003
DOCK2	0.0003	0.0003	0.0003	0.0003	0.0003	0.0101	0.0003	0.0003	0.0003	0.0003	0.0003	0.0003	0.0178	0.0242	0.0003	0.0003	0.0086
SGCA	0.0003	0.0003	0.0003	0.0003	0.0003	0.0003	0.0003	0.0003	0.0003	0.0003	0.0003	0.0003	0.0003	0.0003	0.0601	0.0003	0.0003
PLCB1	0.0003	0.0003	0.0003	0.0003	0.0003	0.0003	0.0602	0.0003	0.0003	0.0003	0.0003	0.0003	0.0003	0.0003	0.0003	0.0003	0.0003
MUC12	0.0003	0.0003	0.0003	0.0003	0.0003	0.0003	0.0604	0.0003	0.0003	0.0003	0.0003	0.0003	0.0003	0.0003	0.0003	0.0003	0.0003
EEF2K	0.0003	0.0003	0.0003	0.0003	0.0003	0.0139	0.0061	0.0003	0.0003	0.0003	0.0003	0.0003	0.0054	0.0003	0.0003	0.0233	0.013
LOC101060570	0.0003	0.0003	0.0003	0.0003	0.0003	0.0139	0.0061	0.0003	0.0003	0.0003	0.0003	0.0003	0.0054	0.0003	0.0003	0.0233	0.013
MDP1	0.0003	0.0003	0.0003	0.0003	0.0003	0.0003	0.0605	0.0003	0.0003	0.0003	0.0003	0.0003	0.0003	0.0003	0.0003	0.0003	0.0003
RABGAP1L	0.0003	0.0003	0.0003	0.0003	0.0003	0.0003	0.0003	0.0605	0.0003	0.0003	0.0003	0.0003	0.0003	0.0003	0.0003	0.0003	0.0003
RRAGB	0.0003	0.0003	0.0003	0.0003	0.0003	0.0003	0.0003	0.0193	0.0003	0.0003	0.0003	0.0003	0.0003	0.042	0.0003	0.0003	0.0003
SPATA31D1	0.0003	0.0003	0.0003	0.0003	0.0003	0.0003	0.0003	0.0003	0.0003	0.0003	0.0003	0.0003	0.0003	0.0003	0.0611	0.0003	0.0003
FOXH1	0.0003	0.0003	0.0003	0.0003	0.0003	0.0003	0.0003	0.0003	0.0613	0.0003	0.0003	0.0003	0.0003	0.0003	0.0003	0.0003	0.0003
CA5B	0.0003	0.0003	0.0003	0.0003	0.0003	0.0003	0.0003	0.0003	0.0003	0.0003	0.0616	0.0003	0.0003	0.0003	0.0003	0.0003	0.0003
GNPAT	0.0003	0.0003	0.0003	0.0003	0.0003	0.0003	0.0003	0.0003	0.0003	0.0003	0.0003	0.0003	0.0003	0.0003	0.0003	0.0623	0.0003
TTC17	0.0003	0.0003	0.0003	0.0003	0.0003	0.0003	0.0003	0.0003	0.0003	0.0003	0.0003	0.0003	0.0003	0.0003	0.0626	0.0003	0.0003
ARHGAP4	0.0003	0.0003	0.0003	0.0003	0.0003	0.0003	0.0003	0.0003	0.0003	0.0003	0.0003	0.0003	0.0003	0.0003	0.0003	0.0003	0.0629
BCORL1	0.0003	0.0003	0.0003	0.0003	0.0003	0.0003	0.0243	0.0003	0.0003	0.0003	0.0003	0.039	0.0003	0.0003	0.0003	0.0003	0.0003
CAPN3	0.0003	0.0003	0.0003	0.0003	0.0003	0.0003	0.0003	0.0003	0.0003	0.0003	0.0003	0.0003	0.0003	0.0003	0.031	0.0326	0.0003
CLIP2	0.0003	0.0003	0.0003	0.0003	0.0003	0.0003	0.0003	0.0003	0.0003	0.0003	0.0003	0.0003	0.0003	0.0003	0.0003	0.0633	0.0003
FAM184B	0.0003	0.0003	0.0003	0.0003	0.0003	0.0635	0.0003	0.0003	0.0003	0.0003	0.0003	0.0003	0.0003	0.0003	0.0003	0.0003	0.0003
GNMT	0.0003	0.0003	0.0003	0.0003	0.0003	0.0003	0.0003	0.0003	0.0003	0.064	0.0003	0.0003	0.0003	0.0003	0.0003	0.0003	0.0003
NR2F2	0.0003	0.0003	0.0003	0.0003	0.0003	0.0003	0.0003	0.0003	0.0003	0.0003	0.0003	0.0003	0.0003	0.0003	0.0003	0.0003	0.0651
GATM	0.0003	0.0003	0.0003	0.0003	0.0003	0.0003	0.0003	0.0003	0.0003	0.0003	0.0003	0.0003	0.0003	0.0003	0.0003	0.0659	0.0003
COG6	0.0003	0.0003	0.0003	0.0003	0.0003	0.0666	0.0003	0.0003	0.0003	0.0003	0.0003	0.0003	0.0003	0.0003	0.0003	0.0003	0.0003
PEAK1	0.0003	0.0003	0.0003	0.0003	0.0003	0.0216	0.0122	0.0003	0.0003	0.0003	0.0003	0.0003	0.0003	0.0003	0.0003	0.0339	0.0003
LY96	0.0003	0.0003	0.0003	0.0003	0.0003	0.0003	0.0003	0.0003	0.0003	0.0682	0.0003	0.0003	0.0003	0.0003	0.0003	0.0003	0.0003
ANO1	0.0003	0.0003	0.0003	0.0003	0.0003	0.0003	0.0003	0.0684	0.0003	0.0003	0.0003	0.0003	0.0003	0.0003	0.0003	0.0003	0.0003
RRAGA	0.0003	0.0003	0.0003	0.0003	0.0003	0.0003	0.0003	0.0218	0.0003	0.0003	0.0003	0.0003	0.0003	0.0474	0.0003	0.0003	0.0003
TCHP	0.0003	0.0003	0.0003	0.0003	0.0003	0.0003	0.0003	0.0003	0.0003	0.0003	0.0003	0.0003	0.0003	0.0003	0.0003	0.0692	0.0003
CNTN6	0.0003	0.0003	0.0003	0.0003	0.0003	0.0003	0.0003	0.0003	0.0003	0.0003	0.0003	0.0003	0.0003	0.0003	0.0696	0.0003	0.0003
MAGED4	0.0003	0.0003	0.0003	0.0003	0.0003	0.0003	0.0003	0.0003	0.0003	0.0003	0.0003	0.0003	0.0003	0.0003	0.0696	0.0003	0.0003
MAGED4B	0.0003	0.0003	0.0003	0.0003	0.0003	0.0003	0.0003	0.0003	0.0003	0.0003	0.0003	0.0003	0.0003	0.0003	0.0696	0.0003	0.0003
NRP2	0.0003	0.0003	0.0003	0.0003	0.0003	0.0003	0.0436	0.0003	0.0003	0.0003	0.0003	0.0003	0.0003	0.0003	0.0265	0.0003	0.0003
MRPL44	0.0003	0.0003	0.0003	0.0003	0.0003	0.0003	0.0003	0.0003	0.0003	0.0003	0.0003	0.0003	0.0003	0.0003	0.0699	0.0003	0.0003
ABCD1	0.0003	0.0003	0.0003	0.0003	0.0003	0.0338	0.0003	0.0003	0.0003	0.0003	0.0003	0.0003	0.0003	0.0003	0.0003	0.0003	0.0365
NIPSNAP3B	0.0003	0.0003	0.0003	0.0003	0.0003	0.0003	0.0553	0.015	0.0003	0.0003	0.0003	0.0003	0.0003	0.0003	0.0003	0.0003	0.0003
NOX3	0.0003	0.0003	0.0003	0.0003	0.0003	0.0444	0.0003	0.0003	0.0003	0.0003	0.0003	0.0003	0.0003	0.0003	0.0268	0.0003	0.0003
DNAH3	0.0003	0.0003	0.0003	0.0003	0.0003	0.0003	0.0003	0.0003	0.0003	0.0003	0.0003	0.0003	0.0715	0.0003	0.0003	0.0003	0.0003
WDR52	0.0003	0.0003	0.0003	0.0003	0.0003	0.0003	0.0003	0.0003	0.0003	0.0716	0.0003	0.0003	0.0003	0.0003	0.0003	0.0003	0.0003
IQCH	0.0003	0.0003	0.0003	0.0003	0.0003	0.0191	0.0003	0.0003	0.0003	0.0331	0.0003	0.0003	0.0003	0.0003	0.0204	0.0003	0.0003
CCDC77	0.0003	0.0003	0.0003	0.0003	0.0003	0.0003	0.0003	0.0003	0.0003	0.0726	0.0003	0.0003	0.0003	0.0003	0.0003	0.0003	0.0003
GLT8D1	0.0003	0.0003	0.0003	0.0003	0.0003	0.0003	0.0003	0.0003	0.0003	0.0003	0.0003	0.0003	0.0003	0.0003	0.0003	0.0003	0.0732
LTN1	0.0003	0.0003	0.0003	0.0003	0.0003	0.0003	0.0003	0.0003	0.0003	0.0003	0.0003	0.0003	0.0003	0.0003	0.0003	0.0737	0.0003
RENBP	0.0003	0.0003	0.0003	0.0003	0.0003	0.0376	0.0003	0.0003	0.0003	0.0368	0.0003	0.0003	0.0003	0.0003	0.0003	0.0003	0.0003
C5orf42	0.0003	0.0003	0.0003	0.0003	0.0003	0.0003	0.0003	0.0003	0.0003	0.0742	0.0003	0.0003	0.0003	0.0003	0.0003	0.0003	0.0003
CHAD	0.0003	0.0003	0.0003	0.0003	0.0003	0.0003	0.0003	0.0003	0.0745	0.0003	0.0003	0.0003	0.0003	0.0003	0.0003	0.0003	0.0003
LOC643037	0.0003	0.0003	0.0003	0.0003	0.0003	0.0748	0.0003	0.0003	0.0003	0.0003	0.0003	0.0003	0.0003	0.0003	0.0003	0.0003	0.0003
HIC1	0.0003	0.0003	0.0003	0.0003	0.0003	0.0003	0.0003	0.0003	0.0003	0.0003	0.0003	0.0003	0.0003	0.0003	0.0755	0.0003	0.0003
NRF1	0.0003	0.0003	0.0003	0.0003	0.0003	0.0757	0.0003	0.0003	0.0003	0.0003	0.0003	0.0003	0.0003	0.0003	0.0003	0.0003	0.0003
BCL2	0.0003	0.0003	0.0003	0.0003	0.0003	0.0003	0.0003	0.0003	0.0003	0.0003	0.0003	0.0003	0.0003	0.0003	0.0003	0.0003	0.0761
NTAN1	0.0003	0.0003	0.0003	0.0003	0.0003	0.0003	0.0003	0.0003	0.0003	0.0003	0.0003	0.0003	0.0003	0.0003	0.0003	0.0763	0.0003
MYOCD	0.0003	0.0003	0.0003	0.0003	0.0003	0.0003	0.0003	0.0003	0.0003	0.0003	0.0003	0.0003	0.0003	0.0765	0.0003	0.0003	0.0003
FUT11	0.0003	0.0003	0.0003	0.0003	0.0003	0.0003	0.0003	0.0003	0.0003	0.0003	0.0003	0.0003	0.0003	0.0003	0.0003	0.0003	0.0767
GP1BA	0.0003	0.0003	0.0003	0.0003	0.0003	0.0003	0.0393	0.0003	0.0003	0.0003	0.0379	0.0003	0.0003	0.0003	0.0003	0.0003	0.0003
DCAF8	0.0003	0.0003	0.0003	0.0003	0.0003	0.0003	0.0003	0.0003	0.0003	0.0003	0.0003	0.0003	0.0003	0.0003	0.0226	0.0548	0.0003
MATN1	0.0003	0.0003	0.0003	0.0003	0.0003	0.0003	0.0003	0.0003	0.0776	0.0003	0.0003	0.0003	0.0003	0.0003	0.0003	0.0003	0.0003
LOC100996780	0.0003	0.0003	0.0003	0.0003	0.0003	0.0788	0.0003	0.0003	0.0003	0.0003	0.0003	0.0003	0.0003	0.0003	0.0003	0.0003	0.0003
TXNRD2	0.0003	0.0003	0.0003	0.0003	0.0003	0.0003	0.0003	0.0797	0.0003	0.0003	0.0003	0.0003	0.0003	0.0003	0.0003	0.0003	0.0003
GP6	0.0003	0.0003	0.0003	0.0003	0.0003	0.0003	0.0003	0.0003	0.0003	0.0799	0.0003	0.0003	0.0003	0.0003	0.0003	0.0003	0.0003
SYN2	0.0003	0.0003	0.0003	0.0003	0.0003	0.0003	0.0003	0.0606	0.0003	0.0003	0.0003	0.0198	0.0003	0.0003	0.0003	0.0003	0.0003
SYT1	0.0003	0.0003	0.0003	0.0003	0.0003	0.0003	0.0806	0.0003	0.0003	0.0003	0.0003	0.0003	0.0003	0.0003	0.0003	0.0003	0.0003
ZC3HAV1L	0.0003	0.0003	0.0003	0.0003	0.0003	0.0811	0.0003	0.0003	0.0003	0.0003	0.0003	0.0003	0.0003	0.0003	0.0003	0.0003	0.0003
TBC1D10B	0.0003	0.0003	0.0003	0.0003	0.0003	0.0814	0.0003	0.0003	0.0003	0.0003	0.0003	0.0003	0.0003	0.0003	0.0003	0.0003	0.0003
ADO	0.0003	0.0003	0.0003	0.0003	0.0003	0.0003	0.0003	0.0828	0.0003	0.0003	0.0003	0.0003	0.0003	0.0003	0.0003	0.0003	0.0003
NUP88	0.0003	0.0003	0.0003	0.0003	0.0003	0.0003	0.0003	0.0003	0.0003	0.0003	0.0003	0.0003	0.0003	0.0003	0.0003	0.0003	0.0833
MED6	0.0003	0.0003	0.0003	0.0003	0.0003	0.0003	0.0003	0.0003	0.0003	0.0003	0.0003	0.0003	0.0003	0.0003	0.0837	0.0003	0.0003
VPS8	0.0003	0.0003	0.0003	0.0003	0.0003	0.0356	0.0091	0.0003	0.0003	0.0003	0.0003	0.0003	0.0003	0.0003	0.0003	0.0396	0.0003
DHRS7C	0.0003	0.0003	0.0003	0.0003	0.0003	0.0003	0.0003	0.0003	0.0003	0.0003	0.0003	0.0003	0.0003	0.0003	0.0847	0.0003	0.0003
CTSF	0.0003	0.0003	0.0003	0.0003	0.0003	0.0003	0.0003	0.0851	0.0003	0.0003	0.0003	0.0003	0.0003	0.0003	0.0003	0.0003	0.0003
HELLS	0.0003	0.0003	0.0003	0.0003	0.0003	0.0003	0.0857	0.0003	0.0003	0.0003	0.0003	0.0003	0.0003	0.0003	0.0003	0.0003	0.0003
TRIM36	0.0003	0.0003	0.0003	0.0003	0.0003	0.0003	0.0003	0.0865	0.0003	0.0003	0.0003	0.0003	0.0003	0.0003	0.0003	0.0003	0.0003
CCNG1	0.0003	0.0003	0.0003	0.0003	0.0003	0.0003	0.0003	0.0003	0.0003	0.0003	0.0003	0.0003	0.0003	0.0003	0.0003	0.0869	0.0003
LOC101060664	0.0003	0.0003	0.0003	0.0003	0.0003	0.0003	0.0115	0.0003	0.0003	0.0003	0.0003	0.0003	0.0003	0.0145	0.0003	0.0618	0.0003
D2HGDH	0.0003	0.0003	0.0003	0.0003	0.0003	0.0003	0.0003	0.0003	0.0003	0.0003	0.0003	0.0003	0.0396	0.0003	0.0003	0.0487	0.0003
FHOD1	0.0003	0.0003	0.0003	0.0003	0.0003	0.0003	0.0003	0.0003	0.0003	0.0003	0.0003	0.0003	0.0003	0.0003	0.0887	0.0003	0.0003
FAM89B	0.0003	0.0003	0.0003	0.0003	0.0003	0.0003	0.089	0.0003	0.0003	0.0003	0.0003	0.0003	0.0003	0.0003	0.0003	0.0003	0.0003
KLHL22	0.0003	0.0003	0.0003	0.0003	0.0003	0.0003	0.0243	0.0003	0.0003	0.0003	0.0003	0.0003	0.0003	0.0668	0.0003	0.0003	0.0003
ITGA11	0.0003	0.0003	0.0003	0.0003	0.0003	0.0003	0.0045	0.0003	0.0003	0.0003	0.0003	0.0048	0.0003	0.0003	0.0341	0.0003	0.0492
LSAMP	0.0003	0.0003	0.0003	0.0003	0.0003	0.0003	0.0003	0.0003	0.0003	0.0003	0.0003	0.0003	0.0003	0.0003	0.0923	0.0003	0.0003
RUNDC3A	0.0003	0.0003	0.0003	0.0003	0.0003	0.0003	0.0003	0.0003	0.0003	0.0003	0.0003	0.0003	0.0003	0.0923	0.0003	0.0003	0.0003
VARS2	0.0003	0.0003	0.0003	0.0003	0.0003	0.0003	0.0926	0.0003	0.0003	0.0003	0.0003	0.0003	0.0003	0.0003	0.0003	0.0003	0.0003
ZEB2	0.0003	0.0003	0.0003	0.0003	0.0003	0.0003	0.0003	0.0003	0.0003	0.0003	0.0003	0.0003	0.0003	0.0003	0.0003	0.0931	0.0003
GNB5	0.0003	0.0003	0.0003	0.0003	0.0003	0.0003	0.0003	0.0003	0.0003	0.0003	0.0003	0.0934	0.0003	0.0003	0.0003	0.0003	0.0003
FCGR2C	0.0003	0.0003	0.0003	0.0003	0.0003	0.0939	0.0003	0.0003	0.0003	0.0003	0.0003	0.0003	0.0003	0.0003	0.0003	0.0003	0.0003
EDEM3	0.0003	0.0003	0.0003	0.0003	0.0003	0.0003	0.0003	0.0003	0.0953	0.0003	0.0003	0.0003	0.0003	0.0003	0.0003	0.0003	0.0003
PCBD2	0.0003	0.0003	0.0003	0.0003	0.0003	0.0003	0.0003	0.0003	0.0003	0.0003	0.0003	0.0003	0.0003	0.0003	0.0959	0.0003	0.0003
EBF2	0.0003	0.0003	0.0003	0.0003	0.0003	0.0003	0.0003	0.0003	0.0003	0.0003	0.0003	0.0003	0.0966	0.0003	0.0003	0.0003	0.0003
PTPRE	0.0003	0.0003	0.0003	0.0003	0.0003	0.0003	0.0003	0.0003	0.0003	0.0003	0.0003	0.0003	0.0003	0.0003	0.0003	0.0003	0.0966
AKT1S1	0.0003	0.0003	0.0003	0.0003	0.0003	0.0003	0.0003	0.0003	0.0003	0.0003	0.0968	0.0003	0.0003	0.0003	0.0003	0.0003	0.0003
NUMBL	0.0003	0.0003	0.0003	0.0003	0.0003	0.0003	0.0975	0.0003	0.0003	0.0003	0.0003	0.0003	0.0003	0.0003	0.0003	0.0003	0.0003
STK10	0.0003	0.0003	0.0003	0.0003	0.0003	0.0003	0.0003	0.0003	0.0003	0.0003	0.0003	0.0003	0.0003	0.0003	0.0003	0.0003	0.0977
HIP1	0.0003	0.0003	0.0003	0.0003	0.0003	0.0853	0.0003	0.0003	0.0003	0.0003	0.0003	0.0003	0.0003	0.0003	0.0132	0.0003	0.0003
SAP30BP	0.0003	0.0003	0.0003	0.0003	0.0003	0.0003	0.0987	0.0003	0.0003	0.0003	0.0003	0.0003	0.0003	0.0003	0.0003	0.0003	0.0003
EBF3	0.0003	0.0003	0.0003	0.0003	0.0003	0.0003	0.0003	0.0003	0.0003	0.0003	0.0003	0.0003	0.1	0.0003	0.0003	0.0003	0.0003
MOCS2	0.0003	0.0003	0.0003	0.0003	0.0003	0.0003	0.0003	0.1012	0.0003	0.0003	0.0003	0.0003	0.0003	0.0003	0.0003	0.0003	0.0003
CFHR5	0.0003	0.0003	0.0003	0.0003	0.0003	0.0003	0.0003	0.0003	0.0003	0.0003	0.0003	0.102	0.0003	0.0003	0.0003	0.0003	0.0003
MLIP	0.0003	0.0003	0.0003	0.0003	0.0003	0.0003	0.0003	0.0003	0.0003	0.0003	0.0003	0.0003	0.0003	0.0003	0.1022	0.0003	0.0003
MMAB	0.0003	0.0003	0.0003	0.0003	0.0003	0.0003	0.1024	0.0003	0.0003	0.0003	0.0003	0.0003	0.0003	0.0003	0.0003	0.0003	0.0003
TFPI	0.0003	0.0003	0.0003	0.0003	0.0003	0.0003	0.0003	0.0003	0.0003	0.1029	0.0003	0.0003	0.0003	0.0003	0.0003	0.0003	0.0003
EBF1	0.0003	0.0003	0.0003	0.0003	0.0003	0.0003	0.0003	0.0003	0.0003	0.0003	0.0003	0.0003	0.1037	0.0003	0.0003	0.0003	0.0003
TGFBR3	0.0003	0.0003	0.0003	0.0003	0.0003	0.0003	0.0003	0.1054	0.0003	0.0003	0.0003	0.0003	0.0003	0.0003	0.0003	0.0003	0.0003
USP24	0.0003	0.0003	0.0003	0.0003	0.0003	0.0003	0.0003	0.0003	0.0003	0.0003	0.0003	0.0003	0.1056	0.0003	0.0003	0.0003	0.0003
FOLR2	0.0003	0.0003	0.0003	0.0003	0.0003	0.0003	0.0003	0.0003	0.0003	0.0003	0.0003	0.0003	0.0003	0.0003	0.1058	0.0003	0.0003
ITM2C	0.0003	0.0003	0.0003	0.0003	0.0003	0.0003	0.0003	0.1082	0.0003	0.0003	0.0003	0.0003	0.0003	0.0003	0.0003	0.0003	0.0003
FGL2	0.0003	0.0003	0.0003	0.0003	0.0003	0.0003	0.0003	0.0003	0.0003	0.0003	0.1087	0.0003	0.0003	0.0003	0.0003	0.0003	0.0003
GAB2	0.0003	0.0003	0.0003	0.0003	0.0003	0.0003	0.0003	0.0003	0.0003	0.1093	0.0003	0.0003	0.0003	0.0003	0.0003	0.0003	0.0003
KIAA0319	0.0003	0.0003	0.0003	0.0003	0.0003	0.0003	0.1094	0.0003	0.0003	0.0003	0.0003	0.0003	0.0003	0.0003	0.0003	0.0003	0.0003
FCGR2B	0.0003	0.0003	0.0003	0.0003	0.0003	0.1098	0.0003	0.0003	0.0003	0.0003	0.0003	0.0003	0.0003	0.0003	0.0003	0.0003	0.0003
NUDT2	0.0003	0.0003	0.0003	0.0003	0.0003	0.0003	0.0003	0.0003	0.0003	0.1098	0.0003	0.0003	0.0003	0.0003	0.0003	0.0003	0.0003
SYTL2	0.0003	0.0003	0.0003	0.0003	0.0003	0.1098	0.0003	0.0003	0.0003	0.0003	0.0003	0.0003	0.0003	0.0003	0.0003	0.0003	0.0003
RDH10	0.0003	0.0003	0.0003	0.0003	0.0003	0.0003	0.0546	0.0003	0.0003	0.0003	0.0003	0.0003	0.0003	0.0003	0.0567	0.0003	0.0003
XRCC1	0.0003	0.0003	0.0003	0.0003	0.0003	0.0003	0.0003	0.0003	0.0003	0.0003	0.0003	0.0003	0.0003	0.0003	0.0003	0.0003	0.1111
SLC39A10	0.0003	0.0003	0.0003	0.0003	0.0003	0.0003	0.0003	0.0003	0.0003	0.0003	0.0003	0.0003	0.0003	0.0003	0.0003	0.0003	0.1114
CHI3L1	0.0003	0.0003	0.0003	0.0003	0.0003	0.0003	0.0003	0.0003	0.0003	0.0003	0.0003	0.0003	0.0003	0.1118	0.0003	0.0003	0.0003
PCDHB12	0.0003	0.0003	0.0003	0.0003	0.0003	0.0003	0.0003	0.0003	0.1119	0.0003	0.0003	0.0003	0.0003	0.0003	0.0003	0.0003	0.0003
QPCT	0.0003	0.0003	0.0003	0.0003	0.0003	0.0003	0.0003	0.0003	0.0003	0.0003	0.0003	0.1119	0.0003	0.0003	0.0003	0.0003	0.0003
COG1	0.0003	0.0003	0.0003	0.0003	0.0003	0.0003	0.0003	0.0003	0.0003	0.0003	0.0003	0.112	0.0003	0.0003	0.0003	0.0003	0.0003
TPK1	0.0003	0.0003	0.0003	0.0003	0.0003	0.0003	0.0219	0.0003	0.0003	0.0003	0.0003	0.0003	0.0003	0.091	0.0003	0.0003	0.0003
KIAA1210	0.0003	0.0003	0.0003	0.0003	0.0003	0.0003	0.0003	0.0003	0.0003	0.0003	0.0003	0.0003	0.0003	0.0003	0.1128	0.0003	0.0003
MKRN2	0.0003	0.0003	0.0003	0.0003	0.0003	0.0003	0.0621	0.0513	0.0003	0.0003	0.0003	0.0003	0.0003	0.0003	0.0003	0.0003	0.0003
PPP1R14A	0.0003	0.0003	0.0003	0.0003	0.0003	0.0003	0.1134	0.0003	0.0003	0.0003	0.0003	0.0003	0.0003	0.0003	0.0003	0.0003	0.0003
PSAT1	0.0003	0.0003	0.0003	0.0003	0.0003	0.0003	0.0003	0.0003	0.0003	0.0003	0.0003	0.0003	0.0003	0.0395	0.0003	0.0742	0.0003
CTSK	0.0003	0.0003	0.0003	0.0003	0.0003	0.115	0.0003	0.0003	0.0003	0.0003	0.0003	0.0003	0.0003	0.0003	0.0003	0.0003	0.0003
CADM3	0.0003	0.0003	0.0003	0.0003	0.0003	0.0003	0.0003	0.0274	0.0003	0.0003	0.0882	0.0003	0.0003	0.0003	0.0003	0.0003	0.0003
HNRNPLL	0.0003	0.0003	0.0003	0.0003	0.0003	0.0818	0.0003	0.0003	0.0003	0.0003	0.0003	0.0003	0.0003	0.0003	0.0003	0.0003	0.0341
SRGAP2C	0.0003	0.0003	0.0003	0.0003	0.0003	0.0003	0.0153	0.0003	0.0003	0.0003	0.0003	0.0003	0.0003	0.0194	0.0003	0.0824	0.0003
GYPA	0.0003	0.0003	0.0003	0.0003	0.0003	0.0003	0.0003	0.0003	0.0003	0.0003	0.0003	0.1171	0.0003	0.0003	0.0003	0.0003	0.0003
CEP72	0.0003	0.0003	0.0003	0.0003	0.0003	0.0003	0.0003	0.0003	0.0003	0.0003	0.0003	0.0003	0.0003	0.0003	0.0003	0.1172	0.0003
SIPA1L1	0.0003	0.0003	0.0003	0.0003	0.0003	0.0003	0.0003	0.1181	0.0003	0.0003	0.0003	0.0003	0.0003	0.0003	0.0003	0.0003	0.0003
CD99L2	0.0003	0.0003	0.0003	0.0003	0.0003	0.0003	0.1195	0.0003	0.0003	0.0003	0.0003	0.0003	0.0003	0.0003	0.0003	0.0003	0.0003
WDR70	0.0003	0.0003	0.0003	0.0003	0.0003	0.0003	0.0003	0.0003	0.0003	0.0003	0.0003	0.0003	0.0003	0.0003	0.0003	0.0003	0.1197
KCMF1	0.0003	0.0003	0.0003	0.0003	0.0003	0.057	0.0003	0.0003	0.0003	0.0003	0.0003	0.0003	0.0003	0.0003	0.0633	0.0003	0.0003
IMPG2	0.0003	0.0003	0.0003	0.0003	0.0003	0.0003	0.0003	0.0003	0.0003	0.0003	0.0003	0.0003	0.0003	0.0003	0.1209	0.0003	0.0003
MTTP	0.0003	0.0003	0.0003	0.0003	0.0003	0.121	0.0003	0.0003	0.0003	0.0003	0.0003	0.0003	0.0003	0.0003	0.0003	0.0003	0.0003
SRGAP2B	0.0003	0.0003	0.0003	0.0003	0.0003	0.0003	0.016	0.0003	0.0003	0.0003	0.0003	0.0003	0.0003	0.0202	0.0003	0.086	0.0003
PDE9A	0.0003	0.0003	0.0003	0.0003	0.0003	0.0003	0.0003	0.0003	0.0003	0.0003	0.1224	0.0003	0.0003	0.0003	0.0003	0.0003	0.0003
PXDC1	0.0003	0.0003	0.0003	0.0003	0.0003	0.0003	0.0003	0.0003	0.0003	0.0003	0.0003	0.0003	0.0003	0.0003	0.0003	0.0003	0.1228
TPST1	0.0003	0.0003	0.0003	0.0003	0.0003	0.0003	0.0003	0.0003	0.0003	0.0003	0.0003	0.0003	0.0003	0.0003	0.0003	0.0003	0.1228
OLFM3	0.0003	0.0003	0.0003	0.0003	0.0003	0.0003	0.0003	0.1252	0.0003	0.0003	0.0003	0.0003	0.0003	0.0003	0.0003	0.0003	0.0003
ERLEC1	0.0003	0.0003	0.0003	0.0003	0.0003	0.0653	0.0003	0.0003	0.0003	0.0003	0.0003	0.0003	0.0003	0.0604	0.0003	0.0003	0.0003
SLCO1B1	0.0003	0.0003	0.0003	0.0003	0.0003	0.0937	0.0003	0.0003	0.0003	0.0003	0.0003	0.032	0.0003	0.0003	0.0003	0.0003	0.0003
C16orf58	0.0003	0.0003	0.0003	0.0003	0.0003	0.126	0.0003	0.0003	0.0003	0.0003	0.0003	0.0003	0.0003	0.0003	0.0003	0.0003	0.0003
ADPRHL1	0.0003	0.0003	0.0003	0.0003	0.0003	0.0003	0.0003	0.0003	0.0003	0.0003	0.0003	0.0003	0.0003	0.0003	0.1268	0.0003	0.0003
C7orf41	0.0003	0.0003	0.0003	0.0003	0.0003	0.0003	0.1284	0.0003	0.0003	0.0003	0.0003	0.0003	0.0003	0.0003	0.0003	0.0003	0.0003
OXR1	0.0003	0.0003	0.0003	0.0003	0.0003	0.0003	0.0003	0.0003	0.0003	0.0003	0.0003	0.0003	0.0003	0.0003	0.1314	0.0003	0.0003
ATRN	0.0003	0.0003	0.0003	0.0003	0.0003	0.0427	0.0003	0.0003	0.0003	0.0003	0.0003	0.0003	0.019	0.0453	0.0003	0.0278	0.0003
ITGAX	0.0003	0.0003	0.0003	0.0003	0.0003	0.105	0.0003	0.0003	0.0003	0.0003	0.0003	0.0003	0.0003	0.0003	0.0003	0.0298	0.0003
MRPL47	0.0003	0.0003	0.0003	0.0003	0.0003	0.0003	0.0003	0.0003	0.0003	0.0003	0.0003	0.0003	0.0003	0.0003	0.1348	0.0003	0.0003
GRPEL2	0.0003	0.0003	0.0003	0.0003	0.0003	0.0003	0.0003	0.0003	0.0003	0.1359	0.0003	0.0003	0.0003	0.0003	0.0003	0.0003	0.0003
KIFAP3	0.0003	0.0003	0.0003	0.0003	0.0003	0.0003	0.0003	0.0003	0.0003	0.0003	0.0003	0.0003	0.0003	0.0003	0.0003	0.1378	0.0003
CEP128	0.0003	0.0003	0.0003	0.0003	0.0003	0.0003	0.0003	0.0003	0.0003	0.0003	0.0003	0.0003	0.0003	0.0003	0.0003	0.1393	0.0003
CCDC153	0.0003	0.0003	0.0003	0.0003	0.0003	0.0003	0.0003	0.0003	0.1402	0.0003	0.0003	0.0003	0.0003	0.0003	0.0003	0.0003	0.0003
SLCO1B3	0.0003	0.0003	0.0003	0.0003	0.0003	0.1051	0.0003	0.0003	0.0003	0.0003	0.0003	0.0359	0.0003	0.0003	0.0003	0.0003	0.0003
MROH6	0.0003	0.0003	0.0003	0.0003	0.0003	0.0003	0.0003	0.0003	0.0003	0.1413	0.0003	0.0003	0.0003	0.0003	0.0003	0.0003	0.0003
STEAP4	0.0003	0.0003	0.0003	0.0003	0.0003	0.0003	0.0003	0.0003	0.1415	0.0003	0.0003	0.0003	0.0003	0.0003	0.0003	0.0003	0.0003
FAM175B	0.0003	0.0003	0.0003	0.0003	0.0003	0.0003	0.0003	0.0003	0.0003	0.0003	0.0003	0.0003	0.0003	0.0003	0.0003	0.0003	0.1447
INSC	0.0003	0.0003	0.0003	0.0003	0.0003	0.0003	0.0003	0.0003	0.0003	0.0003	0.0003	0.0003	0.0003	0.0003	0.0003	0.1452	0.0003
USP11	0.0003	0.0003	0.0003	0.0003	0.0003	0.0003	0.0003	0.0003	0.0003	0.0003	0.0003	0.0003	0.0003	0.0003	0.1454	0.0003	0.0003
PAPSS2	0.0003	0.0003	0.0003	0.0003	0.0003	0.0872	0.0003	0.0003	0.0003	0.0003	0.0003	0.0003	0.0003	0.0003	0.0003	0.0586	0.0003
ASCC2	0.0003	0.0003	0.0003	0.0003	0.0003	0.0583	0.0112	0.0003	0.0003	0.0003	0.0219	0.0003	0.0262	0.0003	0.0297	0.0003	0.0003
SIRPA	0.0003	0.0003	0.0003	0.0003	0.0003	0.0003	0.147	0.0003	0.0003	0.0003	0.0003	0.0003	0.0003	0.0003	0.0003	0.0003	0.0003
SPG11	0.0003	0.0003	0.0003	0.0003	0.0003	0.0003	0.0153	0.0124	0.009	0.0003	0.0003	0.0189	0.0003	0.0003	0.0156	0.0303	0.0476
ZFYVE19	0.0003	0.0003	0.0003	0.0003	0.0003	0.0003	0.0003	0.0003	0.0003	0.0003	0.0003	0.0003	0.0003	0.0598	0.0003	0.0884	0.0003
IL16	0.0003	0.0003	0.0003	0.0003	0.0003	0.0389	0.0003	0.0003	0.0003	0.0003	0.0003	0.0003	0.0328	0.0231	0.0003	0.0003	0.0542
SGCB	0.0003	0.0003	0.0003	0.0003	0.0003	0.1502	0.0003	0.0003	0.0003	0.0003	0.0003	0.0003	0.0003	0.0003	0.0003	0.0003	0.0003
GYPC	0.0003	0.0003	0.0003	0.0003	0.0003	0.0003	0.1511	0.0003	0.0003	0.0003	0.0003	0.0003	0.0003	0.0003	0.0003	0.0003	0.0003
EDC3	0.0003	0.0003	0.0003	0.0003	0.0003	0.0003	0.0003	0.0003	0.0003	0.0003	0.0003	0.0003	0.0003	0.0003	0.0003	0.1514	0.0003
RFC4	0.0003	0.0003	0.0003	0.0003	0.0003	0.0003	0.0003	0.0003	0.0003	0.0003	0.0003	0.0003	0.0003	0.0762	0.0755	0.0003	0.0003
CHPF	0.0003	0.0003	0.0003	0.0003	0.0003	0.0455	0.0003	0.0003	0.0003	0.0003	0.0003	0.0003	0.0003	0.0003	0.0003	0.0703	0.037
TMEM201	0.0003	0.0003	0.0003	0.0003	0.0003	0.0003	0.0003	0.0003	0.0003	0.0003	0.0003	0.0003	0.0003	0.0003	0.0003	0.0003	0.1527
LIAS	0.0003	0.0003	0.0003	0.0003	0.0003	0.0003	0.0003	0.0003	0.0003	0.0003	0.0003	0.0003	0.0003	0.0003	0.1537	0.0003	0.0003
NRG2	0.0003	0.0003	0.0003	0.0003	0.0003	0.0003	0.0003	0.0003	0.0003	0.0003	0.0003	0.0003	0.066	0.0003	0.0003	0.0883	0.0003
RASIP1	0.0003	0.0003	0.0003	0.0003	0.0003	0.0218	0.0309	0.0003	0.0003	0.0238	0.0003	0.0003	0.0003	0.0003	0.0003	0.0003	0.0789
SLCO1B7	0.0003	0.0003	0.0003	0.0003	0.0003	0.1156	0.0003	0.0003	0.0003	0.0003	0.0003	0.0395	0.0003	0.0003	0.0003	0.0003	0.0003
IQCJ-SCHIP1	0.0003	0.0003	0.0003	0.0003	0.0003	0.0003	0.0003	0.0003	0.156	0.0003	0.0003	0.0003	0.0003	0.0003	0.0003	0.0003	0.0003
ABLIM2	0.0003	0.0003	0.0003	0.0003	0.0003	0.0003	0.0003	0.0003	0.0309	0.0003	0.0003	0.0003	0.0003	0.0003	0.127	0.0003	0.0003
PDGFRA	0.0003	0.0003	0.0003	0.0003	0.0003	0.1591	0.0003	0.0003	0.0003	0.0003	0.0003	0.0003	0.0003	0.0003	0.0003	0.0003	0.0003
IMPDH1	0.0003	0.0003	0.0003	0.0003	0.0003	0.0505	0.0003	0.0003	0.0003	0.0003	0.0003	0.0003	0.0003	0.0536	0.0003	0.0561	0.0003
APOL1	0.0003	0.0003	0.0003	0.0003	0.0003	0.0003	0.0003	0.0003	0.0633	0.0971	0.0003	0.0003	0.0003	0.0003	0.0003	0.0003	0.0003
FBXL20	0.0003	0.0003	0.0003	0.0003	0.0003	0.0376	0.0003	0.0003	0.0003	0.0003	0.0003	0.0003	0.0003	0.0393	0.0243	0.06	0.0003
SDSL	0.0003	0.0003	0.0003	0.0003	0.0003	0.0003	0.0003	0.0003	0.0003	0.0003	0.0003	0.0003	0.0003	0.0003	0.0003	0.0003	0.161
NRAP	0.0003	0.0003	0.0003	0.0003	0.0003	0.0003	0.0003	0.0003	0.0003	0.0003	0.0003	0.0003	0.0003	0.0003	0.1618	0.0003	0.0003
ATP5E	0.0003	0.0003	0.0003	0.0003	0.0003	0.0003	0.1654	0.0003	0.0003	0.0003	0.0003	0.0003	0.0003	0.0003	0.0003	0.0003	0.0003
TAPT1	0.0003	0.0003	0.0003	0.0003	0.0003	0.0003	0.0003	0.0003	0.0003	0.0003	0.0003	0.0003	0.0003	0.0003	0.1656	0.0003	0.0003
CHMP7	0.0003	0.0003	0.0003	0.0003	0.0003	0.0003	0.0003	0.1661	0.0003	0.0003	0.0003	0.0003	0.0003	0.0003	0.0003	0.0003	0.0003
PROZ	0.0003	0.0003	0.0003	0.0003	0.0003	0.0003	0.0003	0.0003	0.0003	0.0003	0.0003	0.0003	0.0003	0.1673	0.0003	0.0003	0.0003
FSIP2	0.0003	0.0003	0.0003	0.0003	0.0003	0.0003	0.0003	0.0003	0.0003	0.0049	0.0003	0.0003	0.0003	0.164	0.0003	0.0003	0.0003
BCHE	0.0003	0.0003	0.0003	0.0003	0.0003	0.0003	0.0003	0.0003	0.0003	0.0003	0.0003	0.0003	0.0003	0.1691	0.0003	0.0003	0.0003
GPR143	0.0003	0.0003	0.0003	0.0003	0.0003	0.0003	0.0003	0.0003	0.0003	0.0003	0.1692	0.0003	0.0003	0.0003	0.0003	0.0003	0.0003
OR52K1	0.0003	0.0003	0.0003	0.0003	0.0003	0.0003	0.0003	0.0003	0.0003	0.0003	0.0003	0.0003	0.0003	0.0003	0.0003	0.0003	0.1697
OR52K2	0.0003	0.0003	0.0003	0.0003	0.0003	0.0003	0.0003	0.0003	0.0003	0.0003	0.0003	0.0003	0.0003	0.0003	0.0003	0.0003	0.1697
ZNF850	0.0003	0.0003	0.0003	0.0003	0.0003	0.0003	0.0003	0.0003	0.0003	0.0003	0.0003	0.0003	0.1417	0.0003	0.0312	0.0003	0.0003
FKBP15	0.0003	0.0003	0.0003	0.0003	0.0003	0.0278	0.0003	0.0003	0.0003	0.0003	0.0003	0.0003	0.0379	0.0003	0.0274	0.0207	0.0606
SCHIP1	0.0003	0.0003	0.0003	0.0003	0.0003	0.0003	0.0003	0.0003	0.1737	0.0003	0.0003	0.0003	0.0003	0.0003	0.0003	0.0003	0.0003
FAM83G	0.0003	0.0003	0.0003	0.0003	0.0003	0.0003	0.1738	0.0003	0.0003	0.0003	0.0003	0.0003	0.0003	0.0003	0.0003	0.0003	0.0003
CPT1B	0.0003	0.0003	0.0003	0.0003	0.0003	0.0003	0.0003	0.0003	0.0003	0.0003	0.0003	0.0003	0.0003	0.0003	0.1743	0.0003	0.0003
LSM6	0.0003	0.0003	0.0003	0.0003	0.0003	0.1761	0.0003	0.0003	0.0003	0.0003	0.0003	0.0003	0.0003	0.0003	0.0003	0.0003	0.0003
VAV2	0.0003	0.0003	0.0003	0.0003	0.0003	0.1763	0.0003	0.0003	0.0003	0.0003	0.0003	0.0003	0.0003	0.0003	0.0003	0.0003	0.0003
NOXA1	0.0003	0.0003	0.0003	0.0003	0.0003	0.0003	0.0003	0.0003	0.0003	0.0003	0.0003	0.0003	0.0003	0.0003	0.0003	0.0003	0.1781
MAPK12	0.0003	0.0003	0.0003	0.0003	0.0003	0.0003	0.0003	0.0003	0.0003	0.0003	0.0003	0.0003	0.0003	0.0003	0.1795	0.0003	0.0003
BDP1	0.0003	0.0003	0.0003	0.0003	0.0003	0.0003	0.0003	0.0003	0.0003	0.0003	0.1797	0.0003	0.0003	0.0003	0.0003	0.0003	0.0003
TP53BP1	0.0003	0.0003	0.0003	0.0003	0.0003	0.0132	0.0003	0.0003	0.0003	0.0003	0.0003	0.0003	0.0003	0.0121	0.0003	0.0684	0.0877
ZNF512	0.0003	0.0003	0.0003	0.0003	0.0003	0.0003	0.0003	0.0244	0.0003	0.0003	0.0003	0.0241	0.0003	0.0003	0.0003	0.0003	0.1335
UBE2G1	0.0003	0.0003	0.0003	0.0003	0.0003	0.1843	0.0003	0.0003	0.0003	0.0003	0.0003	0.0003	0.0003	0.0003	0.0003	0.0003	0.0003
AP1S2	0.0003	0.0003	0.0003	0.0003	0.0003	0.1844	0.0003	0.0003	0.0003	0.0003	0.0003	0.0003	0.0003	0.0003	0.0003	0.0003	0.0003
OS9	0.0003	0.0003	0.0003	0.0003	0.0003	0.0003	0.0003	0.0003	0.0003	0.0003	0.0003	0.0003	0.0003	0.0675	0.0003	0.1172	0.0003
JSRP1	0.0003	0.0003	0.0003	0.0003	0.0003	0.0003	0.0003	0.0003	0.0003	0.0003	0.0003	0.0003	0.0003	0.0003	0.1847	0.0003	0.0003
CHST6	0.0003	0.0003	0.0003	0.0003	0.0003	0.0003	0.0003	0.0003	0.0003	0.0003	0.0003	0.0003	0.0003	0.0403	0.0003	0.1463	0.0003
CAPN5	0.0003	0.0003	0.0003	0.0003	0.0003	0.0303	0.0188	0.0003	0.0003	0.0003	0.0003	0.0003	0.0003	0.0003	0.0721	0.0223	0.0443
MINPP1	0.0003	0.0003	0.0003	0.0003	0.0003	0.0481	0.0003	0.0558	0.0003	0.0003	0.0003	0.0003	0.0003	0.0003	0.0003	0.0471	0.0385
CDC42EP1	0.0003	0.0003	0.0003	0.0003	0.0003	0.0003	0.0003	0.0003	0.0003	0.0003	0.0003	0.0003	0.0003	0.0003	0.0003	0.0003	0.192
FGD1	0.0003	0.0003	0.0003	0.0003	0.0003	0.0003	0.0003	0.0003	0.0003	0.1921	0.0003	0.0003	0.0003	0.0003	0.0003	0.0003	0.0003
POLR2C	0.0003	0.0003	0.0003	0.0003	0.0003	0.0003	0.0003	0.0003	0.0003	0.0003	0.0003	0.0003	0.0003	0.0003	0.0003	0.0003	0.1922
HGFAC	0.0003	0.0003	0.0003	0.0003	0.0003	0.0003	0.0003	0.077	0.0003	0.1157	0.0003	0.0003	0.0003	0.0003	0.0003	0.0003	0.0003
ZNF703	0.0003	0.0003	0.0003	0.0003	0.0003	0.0003	0.0003	0.0003	0.0003	0.0003	0.0003	0.0003	0.0003	0.0003	0.1935	0.0003	0.0003
CTCF	0.0003	0.0003	0.0003	0.0003	0.0003	0.1059	0.0003	0.0003	0.0003	0.0003	0.0003	0.0003	0.0003	0.0003	0.0003	0.0003	0.0896
AAAS	0.0003	0.0003	0.0003	0.0003	0.0003	0.0003	0.0003	0.0003	0.0003	0.0003	0.0003	0.0003	0.0003	0.1953	0.0003	0.0003	0.0003
PXK	0.0003	0.0003	0.0003	0.0003	0.0003	0.0003	0.0218	0.0003	0.0003	0.0003	0.0003	0.0189	0.0003	0.0719	0.0003	0.0003	0.0836
SASS6	0.0003	0.0003	0.0003	0.0003	0.0003	0.0003	0.0003	0.0003	0.0003	0.0003	0.0003	0.0003	0.0003	0.0003	0.1967	0.0003	0.0003
RANBP6	0.0003	0.0003	0.0003	0.0003	0.0003	0.0003	0.0683	0.129	0.0003	0.0003	0.0003	0.0003	0.0003	0.0003	0.0003	0.0003	0.0003
TEAD1	0.0003	0.0003	0.0003	0.0003	0.0003	0.2014	0.0003	0.0003	0.0003	0.0003	0.0003	0.0003	0.0003	0.0003	0.0003	0.0003	0.0003
SDAD1	0.0003	0.0003	0.0003	0.0003	0.0003	0.0003	0.0003	0.0003	0.0003	0.0003	0.0003	0.0003	0.0003	0.0003	0.0003	0.2016	0.0003
TRIO	0.0003	0.0003	0.0003	0.0003	0.0003	0.0003	0.0003	0.0003	0.0003	0.0003	0.0003	0.0003	0.0003	0.0003	0.0003	0.0003	0.2049
CDKN2AIPNL	0.0003	0.0003	0.0003	0.0003	0.0003	0.0003	0.0003	0.0003	0.0003	0.0003	0.0003	0.0003	0.0003	0.0003	0.0003	0.0003	0.2055
APPL2	0.0003	0.0003	0.0003	0.0003	0.0003	0.2064	0.0003	0.0003	0.0003	0.0003	0.0003	0.0003	0.0003	0.0003	0.0003	0.0003	0.0003
ZFP36L1	0.0003	0.0003	0.0003	0.0003	0.0003	0.0003	0.0003	0.0003	0.0003	0.0003	0.0003	0.0003	0.2078	0.0003	0.0003	0.0003	0.0003
EPHB2	0.0003	0.0003	0.0003	0.0003	0.0003	0.0003	0.0003	0.0003	0.0003	0.0003	0.0003	0.0003	0.0003	0.0003	0.0003	0.0718	0.1365
ZNF503	0.0003	0.0003	0.0003	0.0003	0.0003	0.0003	0.0003	0.0003	0.0003	0.0003	0.0003	0.0003	0.0003	0.0003	0.2083	0.0003	0.0003
POGLUT1	0.0003	0.0003	0.0003	0.0003	0.0003	0.0003	0.0003	0.0003	0.0003	0.0003	0.0003	0.0436	0.0003	0.0003	0.0273	0.087	0.0519
PI4KB	0.0003	0.0003	0.0003	0.0003	0.0003	0.0003	0.0003	0.0003	0.0003	0.0003	0.0003	0.0296	0.0003	0.0003	0.1797	0.0003	0.0003
NDUFAF4	0.0003	0.0003	0.0003	0.0003	0.0003	0.0003	0.0003	0.2099	0.0003	0.0003	0.0003	0.0003	0.0003	0.0003	0.0003	0.0003	0.0003
BCAS2	0.0003	0.0003	0.0003	0.0003	0.0003	0.0003	0.0003	0.0003	0.0003	0.0003	0.0003	0.0003	0.0003	0.0003	0.0003	0.0003	0.2106
NUP37	0.0003	0.0003	0.0003	0.0003	0.0003	0.2112	0.0003	0.0003	0.0003	0.0003	0.0003	0.0003	0.0003	0.0003	0.0003	0.0003	0.0003
QPRT	0.0003	0.0003	0.0003	0.0003	0.0003	0.2187	0.0003	0.0003	0.0003	0.0003	0.0003	0.0003	0.0003	0.0003	0.0003	0.0003	0.0003
RNF180	0.0003	0.0003	0.0003	0.0003	0.0003	0.0003	0.0003	0.0003	0.0003	0.0003	0.0003	0.2193	0.0003	0.0003	0.0003	0.0003	0.0003
RETN	0.0003	0.0003	0.0003	0.0003	0.0003	0.0003	0.0003	0.0003	0.0003	0.0003	0.0003	0.0003	0.0003	0.0003	0.2202	0.0003	0.0003
GREB1L	0.0003	0.0003	0.0003	0.0003	0.0003	0.0003	0.0003	0.0003	0.0003	0.0003	0.0003	0.018	0.0003	0.169	0.0003	0.0413	0.0003
KRBA1	0.0003	0.0003	0.0003	0.0003	0.0003	0.0003	0.0003	0.0003	0.0003	0.0003	0.0003	0.2281	0.0003	0.0003	0.0003	0.0003	0.0003
CYP27A1	0.0003	0.0003	0.0003	0.0003	0.0003	0.059	0.0003	0.0003	0.0003	0.0003	0.0003	0.0003	0.0003	0.0003	0.0003	0.1708	0.0003
MAGED1	0.0003	0.0003	0.0003	0.0003	0.0003	0.0003	0.0003	0.0003	0.0003	0.0003	0.0003	0.0003	0.0003	0.1151	0.0725	0.0427	0.0003
ARRB2	0.0003	0.0003	0.0003	0.0003	0.0003	0.0003	0.0003	0.0003	0.0003	0.0003	0.0003	0.0003	0.0003	0.1574	0.0003	0.0003	0.0731
TMCC3	0.0003	0.0003	0.0003	0.0003	0.0003	0.0003	0.0003	0.0003	0.0003	0.0003	0.0003	0.0003	0.0003	0.0003	0.1003	0.0003	0.1306
PWP2	0.0003	0.0003	0.0003	0.0003	0.0003	0.0805	0.0003	0.0003	0.0003	0.0003	0.0003	0.0473	0.0003	0.0003	0.0003	0.1043	0.0003
FAM26E	0.0003	0.0003	0.0003	0.0003	0.0003	0.2336	0.0003	0.0003	0.0003	0.0003	0.0003	0.0003	0.0003	0.0003	0.0003	0.0003	0.0003
LYRM7	0.0003	0.0003	0.0003	0.0003	0.0003	0.2338	0.0003	0.0003	0.0003	0.0003	0.0003	0.0003	0.0003	0.0003	0.0003	0.0003	0.0003
ENPP6	0.0003	0.0003	0.0003	0.0003	0.0003	0.0003	0.2347	0.0003	0.0003	0.0003	0.0003	0.0003	0.0003	0.0003	0.0003	0.0003	0.0003
GREM2	0.0003	0.0003	0.0003	0.0003	0.0003	0.0003	0.0003	0.0003	0.0003	0.0003	0.1464	0.0905	0.0003	0.0003	0.0003	0.0003	0.0003
ITM2B	0.0003	0.0003	0.0003	0.0003	0.0003	0.0003	0.0003	0.0003	0.0003	0.1473	0.0003	0.0901	0.0003	0.0003	0.0003	0.0003	0.0003
PTPRG	0.0003	0.0003	0.0003	0.0003	0.0003	0.0003	0.0003	0.0003	0.0003	0.0003	0.1216	0.0186	0.0003	0.0003	0.0003	0.0003	0.0988
CLLU1OS	0.0003	0.0003	0.0003	0.0003	0.0003	0.0003	0.0003	0.0003	0.0003	0.0003	0.2385	0.0003	0.0003	0.0003	0.0003	0.0003	0.0003
EXOSC5	0.0003	0.0003	0.0003	0.0003	0.0003	0.0443	0.0003	0.0003	0.0003	0.0003	0.0003	0.0003	0.0003	0.0003	0.0003	0.0636	0.133
GAPDHS	0.0003	0.0003	0.0003	0.0003	0.0003	0.0003	0.0003	0.0003	0.0003	0.0003	0.0003	0.0003	0.0003	0.0003	0.0003	0.0003	0.2448
SMOC2	0.0003	0.0003	0.0003	0.0003	0.0003	0.0003	0.0192	0.0003	0.0003	0.0003	0.0003	0.0003	0.046	0.135	0.0003	0.046	0.0003
HELB	0.0003	0.0003	0.0003	0.0003	0.0003	0.0003	0.0003	0.0003	0.0003	0.0003	0.0003	0.067	0.0003	0.1801	0.0003	0.0003	0.0003
WNT2	0.0003	0.0003	0.0003	0.0003	0.0003	0.0003	0.0003	0.0003	0.0003	0.0003	0.0003	0.2486	0.0003	0.0003	0.0003	0.0003	0.0003
MAPKBP1	0.0003	0.0003	0.0003	0.0003	0.0003	0.0003	0.255	0.0003	0.0003	0.0003	0.0003	0.0003	0.0003	0.0003	0.0003	0.0003	0.0003
LOC100996571	0.0003	0.0003	0.0003	0.0003	0.0003	0.0003	0.0003	0.0003	0.0003	0.0003	0.0003	0.0003	0.0003	0.0003	0.0003	0.0003	0.2601
GCOM1	0.0003	0.0003	0.0003	0.0003	0.0003	0.0003	0.2615	0.0003	0.0003	0.0003	0.0003	0.0003	0.0003	0.0003	0.0003	0.0003	0.0003
PTPRJ	0.0003	0.0003	0.0003	0.0003	0.0003	0.0003	0.0003	0.0003	0.0003	0.0003	0.0003	0.0003	0.2622	0.0003	0.0003	0.0003	0.0003
KIAA1462	0.0003	0.0003	0.0003	0.0003	0.0003	0.0003	0.1033	0.0003	0.0003	0.0003	0.0003	0.0003	0.0003	0.1595	0.0003	0.0003	0.0003
PTPDC1	0.0003	0.0003	0.0003	0.0003	0.0003	0.0003	0.1638	0.1042	0.0003	0.0003	0.0003	0.0003	0.0003	0.0003	0.0003	0.0003	0.0003
UNC45B	0.0003	0.0003	0.0003	0.0003	0.0003	0.0003	0.0003	0.0003	0.0495	0.0003	0.0003	0.0003	0.0003	0.0003	0.1992	0.0197	0.0003
CCDC40	0.0003	0.0003	0.0003	0.0003	0.0003	0.0403	0.0003	0.0003	0.0003	0.0003	0.0003	0.0003	0.0003	0.0291	0.0003	0.2002	0.0003
MYZAP	0.0003	0.0003	0.0003	0.0003	0.0003	0.0003	0.2718	0.0003	0.0003	0.0003	0.0003	0.0003	0.0003	0.0003	0.0003	0.0003	0.0003
XIAP	0.0003	0.0003	0.0003	0.0003	0.0003	0.0003	0.2733	0.0003	0.0003	0.0003	0.0003	0.0003	0.0003	0.0003	0.0003	0.0003	0.0003
ENPP2	0.0003	0.0003	0.0003	0.0003	0.0003	0.1174	0.0003	0.0003	0.016	0.0003	0.0003	0.0003	0.0283	0.0526	0.0003	0.0508	0.0142
SYNPO2L	0.0003	0.0003	0.0003	0.0003	0.0003	0.0003	0.0003	0.0003	0.0003	0.0003	0.0003	0.0003	0.0003	0.0003	0.2801	0.0003	0.0003
RUNX1	0.0003	0.0003	0.0003	0.0003	0.0003	0.0003	0.0003	0.0003	0.0003	0.0003	0.0003	0.0003	0.0003	0.0003	0.0003	0.0003	0.2815
LPGAT1	0.0003	0.0003	0.0003	0.0003	0.0003	0.0003	0.1894	0.0003	0.0003	0.0003	0.0003	0.0933	0.0003	0.0003	0.0003	0.0003	0.0003
COPZ2	0.0003	0.0003	0.0003	0.0003	0.0003	0.0003	0.0003	0.0003	0.0003	0.0003	0.0003	0.0003	0.0003	0.0003	0.0003	0.2826	0.0003
GRM2	0.0003	0.0003	0.0003	0.0003	0.0003	0.0003	0.0003	0.0003	0.0003	0.2827	0.0003	0.0003	0.0003	0.0003	0.0003	0.0003	0.0003
HS2ST1	0.0003	0.0003	0.0003	0.0003	0.0003	0.094	0.0003	0.0003	0.0003	0.0003	0.0003	0.0003	0.0003	0.0003	0.0003	0.1909	0.0003
LYRM5	0.0003	0.0003	0.0003	0.0003	0.0003	0.0003	0.0003	0.0003	0.0003	0.0003	0.0003	0.0003	0.0003	0.0003	0.285	0.0003	0.0003
NAA10	0.0003	0.0003	0.0003	0.0003	0.0003	0.0003	0.0003	0.0003	0.0003	0.0003	0.0003	0.0003	0.0003	0.0003	0.2852	0.0003	0.0003
RGS19	0.0003	0.0003	0.0003	0.0003	0.0003	0.0741	0.0003	0.0003	0.0003	0.0003	0.0003	0.0003	0.0003	0.0003	0.0003	0.0003	0.2158
ZC3H4	0.0003	0.0003	0.0003	0.0003	0.0003	0.2902	0.0003	0.0003	0.0003	0.0003	0.0003	0.0003	0.0003	0.0003	0.0003	0.0003	0.0003
ANKRD30B	0.0003	0.0003	0.0003	0.0003	0.0003	0.0003	0.0003	0.0003	0.0003	0.0003	0.0003	0.0003	0.0003	0.0003	0.0003	0.2916	0.0003
ERI3	0.0003	0.0003	0.0003	0.0003	0.0003	0.1285	0.0384	0.0491	0.0003	0.0003	0.0003	0.0003	0.0003	0.0003	0.078	0.0003	0.0003
RGL4	0.0003	0.0003	0.0003	0.0003	0.0003	0.0003	0.0003	0.0003	0.0003	0.1604	0.0003	0.0003	0.0003	0.0003	0.1337	0.0003	0.0003
FAM195B	0.0003	0.0003	0.0003	0.0003	0.0003	0.1526	0.0003	0.0003	0.0003	0.0003	0.0003	0.0003	0.0003	0.0003	0.154	0.0003	0.0003
ECM2	0.0003	0.0003	0.0003	0.0003	0.0003	0.0003	0.0373	0.0003	0.0003	0.0003	0.049	0.0003	0.0003	0.1419	0.0003	0.0809	0.0003
ARMCX2	0.0003	0.0003	0.0003	0.0003	0.0003	0.0003	0.0003	0.0003	0.0003	0.0003	0.0003	0.0003	0.0003	0.0003	0.1107	0.1156	0.0831
FBXO8	0.0003	0.0003	0.0003	0.0003	0.0003	0.0003	0.0003	0.0003	0.0003	0.0003	0.0003	0.3128	0.0003	0.0003	0.0003	0.0003	0.0003
OCRL	0.0003	0.0003	0.0003	0.0003	0.0003	0.0003	0.0003	0.1379	0.0003	0.0003	0.0003	0.1755	0.0003	0.0003	0.0003	0.0003	0.0003
AGFG2	0.0003	0.0003	0.0003	0.0003	0.0003	0.0003	0.3169	0.0003	0.0003	0.0003	0.0003	0.0003	0.0003	0.0003	0.0003	0.0003	0.0003
ENDOG	0.0003	0.0003	0.0003	0.0003	0.0003	0.0003	0.0003	0.0003	0.0003	0.0003	0.0003	0.0003	0.0003	0.0003	0.1317	0.0003	0.1867
P4HA3	0.0003	0.0003	0.0003	0.0003	0.0003	0.3217	0.0003	0.0003	0.0003	0.0003	0.0003	0.0003	0.0003	0.0003	0.0003	0.0003	0.0003
CDH19	0.0003	0.0003	0.0003	0.0003	0.0003	0.0003	0.3218	0.0003	0.0003	0.0003	0.0003	0.0003	0.0003	0.0003	0.0003	0.0003	0.0003
B3GALT6	0.0003	0.0003	0.0003	0.0003	0.0003	0.0003	0.0003	0.0003	0.0003	0.0003	0.0003	0.0003	0.0003	0.0003	0.0003	0.3225	0.0003
RYR1	0.0003	0.0003	0.0003	0.0003	0.0003	0.0003	0.0003	0.0003	0.0531	0.0003	0.0003	0.0003	0.0988	0.0003	0.1745	0.0052	0.0003
C16orf70	0.0003	0.0003	0.0003	0.0003	0.0003	0.0003	0.0003	0.0003	0.0003	0.0003	0.0003	0.0003	0.0003	0.0003	0.0003	0.0003	0.3418
B4GALNT2	0.0003	0.0003	0.0003	0.0003	0.0003	0.0003	0.0003	0.0003	0.0003	0.0003	0.0003	0.0003	0.0003	0.0003	0.0003	0.344	0.0003
HOXD9	0.0003	0.0003	0.0003	0.0003	0.0003	0.0003	0.0003	0.0003	0.0003	0.347	0.0003	0.0003	0.0003	0.0003	0.0003	0.0003	0.0003
ZW10	0.0003	0.0003	0.0003	0.0003	0.0003	0.0003	0.0003	0.0209	0.0003	0.0003	0.0003	0.0003	0.0863	0.0003	0.0255	0.0649	0.153
CD36	0.0003	0.0003	0.0003	0.0003	0.0003	0.0003	0.0003	0.0003	0.1463	0.0003	0.0003	0.0003	0.0905	0.0003	0.1133	0.0003	0.0003
SLC6A3	0.0003	0.0003	0.0003	0.0003	0.0003	0.0003	0.0003	0.0003	0.0003	0.0003	0.0003	0.0003	0.0003	0.0003	0.0003	0.3502	0.0003
NEDD1	0.0003	0.0003	0.0003	0.0003	0.0003	0.0003	0.0633	0.0003	0.0003	0.0003	0.0003	0.0003	0.0003	0.0003	0.2889	0.0003	0.0003
DNAJC25-GNG10	0.0003	0.0003	0.0003	0.0003	0.0003	0.1627	0.0285	0.0003	0.0003	0.0003	0.0003	0.0003	0.0003	0.164	0.0003	0.0003	0.0003
GPR124	0.0003	0.0003	0.0003	0.0003	0.0003	0.0003	0.0125	0.0003	0.0003	0.0003	0.0003	0.0003	0.0003	0.0003	0.3445	0.0003	0.0003
NT5DC2	0.0003	0.0003	0.0003	0.0003	0.0003	0.0943	0.0161	0.0003	0.0003	0.0003	0.0003	0.0003	0.0003	0.0974	0.0892	0.0655	0.0003
SMIM21	0.0003	0.0003	0.0003	0.0003	0.0003	0.0003	0.0003	0.0003	0.0003	0.362	0.0003	0.0003	0.0003	0.0003	0.0003	0.0003	0.0003
SPON2	0.0003	0.0003	0.0003	0.0003	0.0003	0.0003	0.0003	0.0003	0.0003	0.0003	0.0003	0.0003	0.0003	0.0003	0.0003	0.3669	0.0003
NCKAP1L	0.0003	0.0003	0.0003	0.0003	0.0003	0.0003	0.0003	0.0003	0.0003	0.0003	0.0003	0.0003	0.0003	0.0003	0.3674	0.0003	0.0003
CDKN2C	0.0003	0.0003	0.0003	0.0003	0.0003	0.1897	0.0845	0.0966	0.0003	0.0003	0.0003	0.0003	0.0003	0.0003	0.0003	0.0003	0.0003
FAM105A	0.0003	0.0003	0.0003	0.0003	0.0003	0.211	0.0667	0.0003	0.0003	0.0003	0.0003	0.0003	0.0003	0.0003	0.0948	0.0003	0.0003
FBXO3	0.0003	0.0003	0.0003	0.0003	0.0003	0.0003	0.0003	0.0003	0.0003	0.0003	0.0003	0.0003	0.0003	0.0003	0.1704	0.0003	0.2047
LYVE1	0.0003	0.0003	0.0003	0.0003	0.0003	0.0003	0.0003	0.0003	0.0889	0.0003	0.0003	0.0003	0.0003	0.2863	0.0003	0.0003	0.0003
FNDC3B	0.0003	0.0003	0.0003	0.0003	0.0003	0.1472	0.0003	0.0003	0.0003	0.0003	0.0003	0.0003	0.1111	0.0003	0.0003	0.1205	0.0003
FAM177A1	0.0003	0.0003	0.0003	0.0003	0.0003	0.3807	0.0003	0.0003	0.0003	0.0003	0.0003	0.0003	0.0003	0.0003	0.0003	0.0003	0.0003
OBSCN	0.0003	0.0003	0.0003	0.0003	0.0003	0.0003	0.0003	0.0003	0.0797	0.0003	0.0003	0.0003	0.0355	0.0003	0.2634	0.0032	0.0003
GMPR	0.0003	0.0003	0.0003	0.0003	0.0003	0.1017	0.0003	0.0003	0.1981	0.0003	0.0003	0.0003	0.0003	0.0003	0.0876	0.0003	0.0003
BCL2L1	0.0003	0.0003	0.0003	0.0003	0.0003	0.1444	0.0003	0.0699	0.0003	0.0003	0.0003	0.0003	0.0003	0.0003	0.0003	0.1043	0.0752
PCOLCE2	0.0003	0.0003	0.0003	0.0003	0.0003	0.0003	0.0003	0.0003	0.0003	0.0003	0.0003	0.3959	0.0003	0.0003	0.0003	0.0003	0.0003
SLIT3	0.0003	0.0003	0.0003	0.0003	0.0003	0.0003	0.0003	0.0003	0.1374	0.0003	0.0003	0.0003	0.0003	0.0003	0.0003	0.2596	0.0003
PLP1	0.0003	0.0003	0.0003	0.0003	0.0003	0.0003	0.403	0.0003	0.0003	0.0003	0.0003	0.0003	0.0003	0.0003	0.0003	0.0003	0.0003
GAL	0.0003	0.0003	0.0003	0.0003	0.0003	0.0003	0.2119	0.1989	0.0003	0.0003	0.0003	0.0003	0.0003	0.0003	0.0003	0.0003	0.0003
FIBP	0.0003	0.0003	0.0003	0.0003	0.0003	0.0399	0.0003	0.0003	0.0003	0.0003	0.0003	0.0324	0.0003	0.1229	0.0003	0.0964	0.1244
DAAM1	0.0003	0.0003	0.0003	0.0003	0.0003	0.0003	0.4201	0.0003	0.0003	0.0003	0.0003	0.0003	0.0003	0.0003	0.0003	0.0003	0.0003
AKAP7	0.0003	0.0003	0.0003	0.0003	0.0003	0.0003	0.0003	0.0003	0.0003	0.0003	0.4245	0.0003	0.0003	0.0003	0.0003	0.0003	0.0003
CTF1	0.0003	0.0003	0.0003	0.0003	0.0003	0.0003	0.1222	0.0968	0.0003	0.0003	0.0003	0.0003	0.0003	0.0003	0.08	0.1272	0.0003
CMTM6	0.0003	0.0003	0.0003	0.0003	0.0003	0.1059	0.0913	0.0003	0.0003	0.0003	0.0003	0.0003	0.0003	0.0003	0.0003	0.238	0.0003
BMX	0.0003	0.0003	0.0003	0.0003	0.0003	0.0003	0.0003	0.0003	0.4426	0.0003	0.0003	0.0003	0.0003	0.0003	0.0003	0.0003	0.0003
MMP10	0.0003	0.0003	0.0003	0.0003	0.0003	0.2679	0.0184	0.0003	0.0003	0.0932	0.0003	0.0003	0.0003	0.0003	0.0003	0.0003	0.0656
LIPA	0.0003	0.0003	0.0003	0.0003	0.0003	0.1951	0.0003	0.0003	0.0003	0.0003	0.0003	0.0003	0.0003	0.0003	0.0003	0.2507	0.0003
ZNF804A	0.0003	0.0003	0.0003	0.0003	0.0003	0.0003	0.0003	0.0003	0.0003	0.0003	0.0003	0.0003	0.2372	0.0003	0.0003	0.0003	0.2086
PRPF38B	0.0003	0.0003	0.0003	0.0003	0.0003	0.0003	0.0003	0.0003	0.0003	0.0003	0.0003	0.0003	0.0003	0.0003	0.0003	0.0003	0.4518
SRR	0.0003	0.0003	0.0003	0.0003	0.0003	0.0003	0.0003	0.0003	0.0003	0.0003	0.0003	0.0003	0.0003	0.0003	0.0003	0.0003	0.4532
DCAF15	0.0003	0.0003	0.0003	0.0003	0.0003	0.2326	0.0003	0.0003	0.0003	0.0003	0.0003	0.0003	0.0929	0.0003	0.0003	0.1284	0.0003
DUSP26	0.0003	0.0003	0.0003	0.0003	0.0003	0.0003	0.0003	0.4568	0.0003	0.0003	0.0003	0.0003	0.0003	0.0003	0.0003	0.0003	0.0003
SNAPIN	0.0003	0.0003	0.0003	0.0003	0.0003	0.0003	0.0003	0.0003	0.0003	0.0003	0.0003	0.0003	0.0003	0.0003	0.458	0.0003	0.0003
C19orf12	0.0003	0.0003	0.0003	0.0003	0.0003	0.0933	0.0844	0.0003	0.0003	0.0003	0.0003	0.0003	0.0003	0.0003	0.2834	0.0003	0.0003
PLOD2	0.0003	0.0003	0.0003	0.0003	0.0003	0.1407	0.0003	0.0003	0.0003	0.0003	0.0003	0.0003	0.0003	0.0314	0.011	0.1311	0.1569
PPP1R3G	0.0003	0.0003	0.0003	0.0003	0.0003	0.0003	0.0003	0.0003	0.0003	0.0003	0.0003	0.0003	0.0003	0.0003	0.0003	0.0003	0.4707
WDFY1	0.0003	0.0003	0.0003	0.0003	0.0003	0.1636	0.0003	0.0759	0.0003	0.0003	0.0003	0.0003	0.0003	0.0003	0.0003	0.0003	0.2437
ADHFE1	0.0003	0.0003	0.0003	0.0003	0.0003	0.0003	0.0003	0.0003	0.0003	0.0003	0.0003	0.0003	0.0003	0.0003	0.4829	0.0003	0.0003
COQ3	0.0003	0.0003	0.0003	0.0003	0.0003	0.0003	0.0003	0.0003	0.0003	0.0003	0.0003	0.0003	0.0003	0.0003	0.4841	0.0003	0.0003
ACPP	0.0003	0.0003	0.0003	0.0003	0.0003	0.0003	0.0201	0.0003	0.0003	0.0003	0.0003	0.0003	0.0003	0.3216	0.1528	0.0003	0.0003
NPY	0.0003	0.0003	0.0003	0.0003	0.0003	0.0003	0.0003	0.4996	0.0003	0.0003	0.0003	0.0003	0.0003	0.0003	0.0003	0.0003	0.0003
PEX19	0.0003	0.0003	0.0003	0.0003	0.0003	0.0003	0.0003	0.0003	0.0003	0.0003	0.0003	0.0003	0.0003	0.0003	0.5	0.0003	0.0003
COL9A2	0.0003	0.0003	0.0003	0.0003	0.0003	0.0003	0.0003	0.0003	0.0003	0.0003	0.0003	0.0003	0.3802	0.1282	0.0003	0.0003	0.0003
LGALS9	0.0003	0.0003	0.0003	0.0003	0.0003	0.0003	0.0003	0.0003	0.0003	0.0003	0.0003	0.0003	0.3313	0.0527	0.0003	0.1259	0.0003
C12orf23	0.0003	0.0003	0.0003	0.0003	0.0003	0.2718	0.0003	0.0003	0.0003	0.0003	0.0003	0.0003	0.0003	0.0003	0.0003	0.2381	0.0003
LMF2	0.0003	0.0003	0.0003	0.0003	0.0003	0.1039	0.0003	0.0003	0.0003	0.0003	0.0003	0.0003	0.0003	0.1308	0.02	0.1426	0.1135
GIMAP1	0.0003	0.0003	0.0003	0.0003	0.0003	0.1259	0.0708	0.0003	0.0003	0.0003	0.0003	0.0003	0.0003	0.3184	0.0003	0.0003	0.0003
CTSS	0.0003	0.0003	0.0003	0.0003	0.0003	0.3812	0.0003	0.0003	0.0003	0.0003	0.0003	0.0003	0.0003	0.1353	0.0003	0.0003	0.0003
XKR6	0.0003	0.0003	0.0003	0.0003	0.0003	0.0003	0.0003	0.0003	0.3844	0.0003	0.0003	0.0003	0.0003	0.0003	0.1376	0.0003	0.0003
UBE2R2	0.0003	0.0003	0.0003	0.0003	0.0003	0.0003	0.0003	0.0003	0.1278	0.0003	0.0003	0.0003	0.0003	0.0003	0.0003	0.4033	0.0003
CNNM2	0.0003	0.0003	0.0003	0.0003	0.0003	0.0003	0.4679	0.0003	0.0003	0.0003	0.0003	0.0003	0.0003	0.0003	0.0651	0.0003	0.0003
ARHGEF6	0.0003	0.0003	0.0003	0.0003	0.0003	0.0675	0.0003	0.0003	0.0003	0.0003	0.0003	0.0003	0.4253	0.0003	0.0003	0.0003	0.0549
ATXN7L2	0.0003	0.0003	0.0003	0.0003	0.0003	0.0003	0.0003	0.0003	0.0003	0.0003	0.0003	0.0003	0.0003	0.5504	0.0003	0.0003	0.0003
FCN1	0.0003	0.0003	0.0003	0.0003	0.0003	0.5506	0.0003	0.0003	0.0003	0.0003	0.0003	0.0003	0.0003	0.0003	0.0003	0.0003	0.0003
KDELC1	0.0003	0.0003	0.0003	0.0003	0.0003	0.0003	0.0003	0.0003	0.0003	0.0003	0.0003	0.0003	0.1205	0.079	0.0003	0.2222	0.135
WAS	0.0003	0.0003	0.0003	0.0003	0.0003	0.0003	0.0003	0.0003	0.0003	0.0003	0.0003	0.0277	0.0003	0.1943	0.0003	0.3368	0.0003
MCFD2	0.0003	0.0003	0.0003	0.0003	0.0003	0.0003	0.0003	0.0003	0.0003	0.0003	0.0003	0.0003	0.0003	0.5641	0.0003	0.0003	0.0003
EGFL8	0.0003	0.0003	0.0003	0.0003	0.0003	0.0003	0.3884	0.0985	0.0003	0.0003	0.0003	0.0003	0.0003	0.0816	0.0003	0.0003	0.0003
SRD5A2	0.0003	0.0003	0.0003	0.0003	0.0003	0.0003	0.2751	0.0003	0.0003	0.1719	0.0003	0.0003	0.0003	0.0003	0.0438	0.0787	0.0003
DGKQ	0.0003	0.0003	0.0003	0.0003	0.0003	0.0003	0.0003	0.0003	0.0003	0.0003	0.0003	0.0003	0.0003	0.5705	0.0003	0.0003	0.0003
ENPEP	0.0003	0.0003	0.0003	0.0003	0.0003	0.025	0.0003	0.0362	0.0261	0.0003	0.0003	0.0003	0.0882	0.0648	0.0867	0.0494	0.2114
BLOC1S1	0.0003	0.0003	0.0003	0.0003	0.0003	0.2592	0.0003	0.0003	0.0003	0.0003	0.0003	0.0003	0.0003	0.0003	0.0003	0.3506	0.0003
POFUT2	0.0003	0.0003	0.0003	0.0003	0.0003	0.0375	0.0003	0.0003	0.0003	0.0003	0.0003	0.0003	0.0003	0.1536	0.2208	0.0003	0.1991
C2orf81	0.0003	0.0003	0.0003	0.0003	0.0003	0.0003	0.0003	0.0003	0.0003	0.0003	0.0003	0.6184	0.0003	0.0003	0.0003	0.0003	0.0003
LMOD3	0.0003	0.0003	0.0003	0.0003	0.0003	0.0003	0.0003	0.0003	0.0003	0.0003	0.0003	0.0003	0.0003	0.0003	0.6369	0.0003	0.0003
COL6A6	0.0003	0.0003	0.0003	0.0003	0.0003	0.4483	0.0003	0.0003	0.0003	0.0003	0.0003	0.0003	0.0213	0.0003	0.0003	0.1706	0.0003
KLK3	0.0003	0.0003	0.0003	0.0003	0.0003	0.0003	0.0003	0.0003	0.0003	0.0003	0.0003	0.0003	0.0003	0.1479	0.515	0.0003	0.0003
GSTT2	0.0003	0.0003	0.0003	0.0003	0.0003	0.0003	0.0003	0.0003	0.0003	0.0003	0.0003	0.0003	0.0003	0.0003	0.664	0.0003	0.0003
GSTT2B	0.0003	0.0003	0.0003	0.0003	0.0003	0.0003	0.0003	0.0003	0.0003	0.0003	0.0003	0.0003	0.0003	0.0003	0.664	0.0003	0.0003
C19orf26	0.0003	0.0003	0.0003	0.0003	0.0003	0.0003	0.0003	0.1779	0.0003	0.0003	0.3507	0.0003	0.0003	0.0003	0.1455	0.0003	0.0003
NANOS1	0.0003	0.0003	0.0003	0.0003	0.0003	0.0003	0.0003	0.0003	0.0003	0.0003	0.0003	0.0003	0.0003	0.3031	0.3792	0.0003	0.0003
DNAJC17	0.0003	0.0003	0.0003	0.0003	0.0003	0.0003	0.0003	0.0003	0.0003	0.0003	0.0003	0.0003	0.0003	0.0003	0.6884	0.0003	0.0003
ZAR1L	0.0003	0.0003	0.0003	0.0003	0.0003	0.0003	0.0003	0.0003	0.0003	0.0003	0.0003	0.0003	0.0003	0.6977	0.0003	0.0003	0.0003
CALB1	0.0003	0.0003	0.0003	0.0003	0.0003	0.0003	0.0003	0.0003	0.0003	0.0003	0.0003	0.0003	0.6985	0.0003	0.0003	0.0003	0.0003
IREB2	0.0003	0.0003	0.0003	0.0003	0.0003	0.0003	0.2661	0.4362	0.0003	0.0003	0.0003	0.0003	0.0003	0.0003	0.0003	0.0003	0.0003
GNG10	0.0003	0.0003	0.0003	0.0003	0.0003	0.3255	0.057	0.0003	0.0003	0.0003	0.0003	0.0003	0.0003	0.328	0.0003	0.0003	0.0003
SREK1	0.0003	0.0003	0.0003	0.0003	0.0003	0.4045	0.0003	0.0003	0.0003	0.0003	0.0003	0.3208	0.0003	0.0003	0.0003	0.0003	0.0003
GABARAPL2	0.0003	0.0003	0.0003	0.0003	0.0003	0.0885	0.1406	0.0003	0.0003	0.0003	0.0003	0.1107	0.0003	0.0003	0.248	0.1436	0.0003
ZSWIM6	0.0003	0.0003	0.0003	0.0003	0.0003	0.0003	0.0003	0.0003	0.0636	0.0003	0.0003	0.0003	0.2894	0.0003	0.0003	0.3801	0.0003
MMP3	0.0003	0.0003	0.0003	0.0003	0.0003	0.4022	0.0198	0.0003	0.0003	0.2527	0.0003	0.0084	0.0003	0.0003	0.0003	0.0003	0.0707
ADCK3	0.0003	0.0003	0.0003	0.0003	0.0003	0.0003	0.0003	0.0003	0.0424	0.0003	0.0003	0.0003	0.0003	0.0003	0.7155	0.0003	0.0003
PTPRS	0.0003	0.0003	0.0003	0.0003	0.0003	0.0003	0.0003	0.0003	0.0003	0.0003	0.0003	0.0003	0.1503	0.6111	0.0003	0.0003	0.0003
LRRC15	0.0003	0.0003	0.0003	0.0003	0.0003	0.0003	0.0003	0.0003	0.0003	0.0003	0.0003	0.0003	0.0003	0.6733	0.0003	0.0902	0.0003
LGALS9C	0.0003	0.0003	0.0003	0.0003	0.0003	0.3735	0.0003	0.0003	0.0003	0.0003	0.0003	0.0003	0.0681	0.1093	0.0003	0.1365	0.0882
JAM3	0.0003	0.0003	0.0003	0.0003	0.0003	0.0003	0.4148	0.3846	0.0003	0.0003	0.0003	0.0003	0.0003	0.0003	0.0003	0.0003	0.0003
LGALS9B	0.0003	0.0003	0.0003	0.0003	0.0003	0.3955	0.0003	0.0003	0.0003	0.0003	0.0003	0.0003	0.0721	0.1157	0.0003	0.1445	0.0934
ARHGAP31	0.0003	0.0003	0.0003	0.0003	0.0003	0.5092	0.2558	0.0003	0.0566	0.0003	0.0003	0.0003	0.0003	0.0003	0.0003	0.0003	0.0003
MPC1L	0.0003	0.0003	0.0003	0.0003	0.0003	0.8306	0.0003	0.0003	0.0003	0.0003	0.0003	0.0003	0.0003	0.0003	0.0003	0.0003	0.0003
ZNF483	0.0003	0.0003	0.0003	0.0003	0.0003	0.8338	0.0003	0.0003	0.0003	0.0003	0.0003	0.0003	0.0003	0.0003	0.0003	0.0003	0.0003
MPC2	0.0003	0.0003	0.0003	0.0003	0.0003	0.2359	0.0003	0.0003	0.0003	0.0003	0.2465	0.0003	0.0003	0.0003	0.3685	0.0003	0.0003
NUDCD2	0.0003	0.0003	0.0003	0.0003	0.0003	0.3037	0.0003	0.0003	0.0003	0.0003	0.0003	0.1047	0.0003	0.0003	0.0003	0.0003	0.4684
IRX5	0.0003	0.0003	0.0003	0.0003	0.0003	0.1427	0.0003	0.0003	0.0003	0.751	0.0003	0.0003	0.0003	0.0003	0.0003	0.0003	0.0003
ANKRD18A	0.0003	0.0003	0.0003	0.0003	0.0003	0.0003	0.0003	0.0003	0.0003	0.0003	0.0003	0.0003	0.0003	0.0003	0.9314	0.0003	0.0003
CD248	0.0003	0.0003	0.0003	0.0003	0.0003	0.1391	0.0307	0.0003	0.0347	0.0003	0.0003	0.0003	0.0896	0.2423	0.0427	0.2135	0.1473
SAA1	0.0003	0.0003	0.0003	0.0003	0.0003	0.0003	0.0003	0.0003	0.0003	0.0003	0.0003	0.0003	0.0003	0.0003	0.0003	0.0003	0.9386
TCAP	0.0003	0.0003	0.0003	0.0003	0.0003	0.0003	0.0003	0.0003	0.1307	0.0003	0.0003	0.0003	0.0003	0.0003	0.7234	0.0859	0.0003
LPCAT1	0.0003	0.0003	0.0003	0.0003	0.0003	0.0003	0.0003	0.0003	0.0003	0.0003	0.0003	0.0003	0.0003	0.4858	0.0003	0.0567	0.3978
MAPKAPK2	0.0003	0.0003	0.0003	0.0003	0.0003	1.003	0.0003	0.0003	0.0003	0.0003	0.0003	0.0003	0.0003	0.0003	0.0003	0.0003	0.0003
CYP1B1	0.0003	0.0003	0.0003	0.0003	0.0003	0.0003	0.0003	0.0003	0.0003	0.0003	0.0003	0.0003	0.0003	0.6992	0.0003	0.3172	0.0003
COCH	0.0003	0.0003	0.0003	0.0003	0.0003	0.0003	0.0003	0.0003	0.0003	1.0246	0.0003	0.0003	0.0003	0.0003	0.0003	0.0003	0.0003
GAMT	0.0003	0.0003	0.0003	0.0003	0.0003	0.0003	0.0003	0.0003	0.0003	0.0003	0.0003	0.0003	0.0003	0.0003	1.026	0.0003	0.0003
SGCG	0.0003	0.0003	0.0003	0.0003	0.0003	0.0003	0.0003	0.0003	0.2152	0.0003	0.0003	0.0003	0.0003	0.0003	0.8233	0.0003	0.0003
FECH	0.0003	0.0003	0.0003	0.0003	0.0003	0.0003	0.0003	0.0003	0.0003	0.0003	0.0003	0.0003	0.0003	0.0003	0.1925	0.3425	0.5184
CREG1	0.0003	0.0003	0.0003	0.0003	0.0003	0.0003	0.0003	0.2641	0.0003	0.0003	0.0003	0.0003	0.0003	0.38	0.0003	0.4116	0.0003
PIGK	0.0003	0.0003	0.0003	0.0003	0.0003	0.0498	0.0198	0.0003	0.0003	0.0713	0.5211	0.0003	0.0003	0.0003	0.0003	0.0003	0.4167
PI15	0.0003	0.0003	0.0003	0.0003	0.0003	0.0003	0.0532	0.0003	0.0003	0.4398	0.0003	0.6043	0.0003	0.0003	0.0003	0.0003	0.0003
PCDHB3	0.0003	0.0003	0.0003	0.0003	0.0003	0.0003	0.0003	0.0003	0.0003	0.0003	0.8104	0.3003	0.0003	0.0003	0.0003	0.0003	0.0003
HSPB3	0.0003	0.0003	0.0003	0.0003	0.0003	0.0003	0.0003	0.0003	0.0003	0.0003	0.0003	0.0003	0.0003	0.0003	1.1332	0.0003	0.0003
PREB	0.0003	0.0003	0.0003	0.0003	0.0003	0.4116	0.4148	0.0003	0.0003	0.0003	0.0003	0.0003	0.0003	0.0003	0.0003	0.0003	0.3421
C1orf198	0.0003	0.0003	0.0003	0.0003	0.0003	0.0003	0.0003	0.0003	0.0003	0.0003	0.0003	0.0003	0.0003	0.0003	1.208	0.0003	0.0003
PLBD2	0.0003	0.0003	0.0003	0.0003	0.0003	0.1903	0.0003	0.0003	0.0408	0.0003	0.0003	0.0003	0.2433	0.3325	0.0003	0.4153	0.0003
CNBD1	0.0003	0.0003	0.0003	0.0003	0.0003	0.0003	0.0003	0.0003	0.0003	0.0003	0.0003	0.0003	0.0003	1.2294	0.0003	0.0003	0.0003
RNASE1	0.0003	0.0003	0.0003	0.0003	0.0003	0.7856	0.0003	0.0003	0.0003	0.471	0.0003	0.0003	0.0003	0.0003	0.0003	0.0003	0.0003
IGFBP6	0.0003	0.0003	0.0003	0.0003	0.0003	0.5778	0.0003	0.0003	0.0003	0.0904	0.0003	0.2967	0.0003	0.2964	0.0003	0.0003	0.0003
ZNF14	0.0003	0.0003	0.0003	0.0003	0.0003	0.0003	0.0003	0.0003	0.0003	0.0003	0.0003	1.0361	0.0003	0.0003	0.24	0.0003	0.0003
MYBPH	0.0003	0.0003	0.0003	0.0003	0.0003	0.0003	0.0003	0.0003	0.0003	0.0003	0.0003	0.0003	0.0003	0.0003	0.9614	0.3485	0.0003
CCDC102B	0.0003	0.0003	0.0003	0.0003	0.0003	0.0003	1.4221	0.0003	0.0003	0.0003	0.0003	0.0003	0.0003	0.0003	0.0003	0.0003	0.0003
CCZ1	0.0003	0.0003	0.0003	0.0003	0.0003	0.0003	0.0003	0.0003	0.0003	0.0003	0.0003	0.0003	0.0003	0.0003	0.0003	0.0003	1.435
CCZ1B	0.0003	0.0003	0.0003	0.0003	0.0003	0.0003	0.0003	0.0003	0.0003	0.0003	0.0003	0.0003	0.0003	0.0003	0.0003	0.0003	1.435
AKT2	0.0003	0.0003	0.0003	0.0003	0.0003	0.0003	1.4358	0.0003	0.0003	0.0003	0.0003	0.0003	0.0003	0.0003	0.0003	0.0003	0.0003
HLA-DRB4	0.0003	0.0003	0.0003	0.0003	0.0003	0.0003	0.0003	0.0003	0.0003	0.0003	0.0003	0.0003	0.0003	1.0495	0.3937	0.0003	0.0003
FCN3	0.0003	0.0003	0.0003	0.0003	0.0003	0.0003	0.0003	0.0003	0.2426	0.0003	0.5583	0.0003	0.0003	0.6565	0.0003	0.0003	0.0003
CSF1R	0.0003	0.0003	0.0003	0.0003	0.0003	0.0003	0.0003	0.0003	0.0003	0.0003	0.0003	0.0003	0.977	0.2348	0.0003	0.2656	0.0003
NCS1	0.0003	0.0003	0.0003	0.0003	0.0003	0.0003	0.8651	0.4588	0.0003	0.0003	0.0003	0.0003	0.0003	0.0003	0.0003	0.0003	0.1745
C16orf80	0.0003	0.0003	0.0003	0.0003	0.0003	0.0003	0.0003	0.185	0.0003	0.0003	0.0003	0.0003	0.2927	0.3205	0.0003	0.2698	0.4637
COA3	0.0003	0.0003	0.0003	0.0003	0.0003	0.0003	0.0003	0.2002	0.0003	0.0003	0.0003	0.1895	0.0003	0.3613	0.9415	0.0003	0.0003
XAGE5	0.0003	0.0003	0.0003	0.0003	0.0003	0.0003	0.0003	0.0003	0.0003	0.0003	0.0003	0.0003	0.0003	1.7102	0.0003	0.0003	0.0003
ADI1	0.0003	0.0003	0.0003	0.0003	0.0003	0.0003	0.3888	0.3172	0.0003	0.4912	0.0003	0.0003	0.5377	0.0003	0.0003	0.0003	0.0003
SLC39A7	0.0003	0.0003	0.0003	0.0003	0.0003	0.0003	0.0003	0.0003	0.0799	0.0003	0.0003	0.1252	0.1462	0.2951	0.0003	0.8606	0.2371
PTPN4	0.0003	0.0003	0.0003	0.0003	0.0003	0.0003	0.0109	0.0003	0.0003	0.0003	0.0756	0.0003	0.0003	0.0003	0.0003	1.6904	0.0003
FANK1	0.0003	0.0003	0.0003	0.0003	0.0003	0.0003	0.0003	0.0003	0.0003	0.0003	0.0003	0.0003	0.0003	0.0003	1.8329	0.0003	0.0003
CTSL	0.0003	0.0003	0.0003	0.0003	0.0003	0.3482	0.0003	0.0003	0.0003	0.0003	0.0003	0.0003	0.4337	0.1529	0.3408	0.5893	0.0003
LYPLA2	0.0003	0.0003	0.0003	0.0003	0.0003	0.9106	0.0364	0.0003	0.2877	0.0003	0.0003	0.0481	0.0003	0.0807	0.0003	0.5146	0.0003
SLC22A3	0.0003	0.0003	0.0003	0.0003	0.0003	0.0003	0.0003	1.8786	0.0003	0.0003	0.0003	0.0003	0.0003	0.0003	0.0003	0.0003	0.0003
CDK19	0.0003	0.0003	0.0003	0.0003	0.0003	0.0003	0.0003	0.0003	0.0003	0.0003	0.0003	0.0003	0.0003	0.0003	0.0003	0.0003	1.9545
GPX7	0.0003	0.0003	0.0003	0.0003	0.0003	0.3178	0.0003	0.0003	0.0003	0.0003	0.0003	0.0003	0.1713	0.4644	0.0003	0.5149	0.5925
2021-03-02	0.0003	0.0003	0.0003	0.0003	0.0003	0.0003	1.4916	0.0003	0.0003	0.0003	0.0003	0.0003	0.0003	0.0003	0.0003	0.5792	0.0003
C1QTNF5	0.0003	0.0003	0.0003	0.0003	0.0003	0.4745	0.0003	0.375	0.0003	0.1787	0.2838	0.2713	0.0003	0.0003	0.0003	0.5191	0.0003
MATN4	0.0003	0.0003	0.0003	0.0003	0.0003	0.0003	0.0003	0.0003	1.9246	0.0003	0.0003	0.0003	0.0435	0.2207	0.0003	0.0003	0.0003
SFRP4	0.0003	0.0003	0.0003	0.0003	0.0003	0.0003	0.0003	0.0003	0.0443	0.0003	0.0003	0.0003	0.2173	1.5174	0.0813	0.3599	0.0003
MYOM3	0.0003	0.0003	0.0003	0.0003	0.0003	0.0003	0.0003	0.0003	0.1973	0.0003	0.0003	0.0003	0.1825	0.0003	1.7066	0.1692	0.0003
TLK1	0.0003	0.0003	0.0003	0.0003	0.0003	0.6637	0.0003	0.0003	0.2191	0.0003	0.0003	0.0003	0.0003	0.9963	0.0003	0.0003	0.396
NOP14	0.0003	0.0003	0.0003	0.0003	0.0003	0.0003	0.0003	0.1706	0.0003	2.1185	0.0003	0.0003	0.0003	0.0003	0.0003	0.0003	0.0003
SYPL2	0.0003	0.0003	0.0003	0.0003	0.0003	0.0003	0.0003	0.0003	0.0003	0.0003	0.0003	0.409	1.2287	0.0003	0.0003	0.7042	0.0003
HRC	0.0003	0.0003	0.0003	0.0003	0.0003	0.0003	0.0003	0.0003	0.6676	0.0003	0.0003	0.0003	0.1776	0.0003	1.3719	0.1796	0.0003
GABRG2	0.0003	0.0003	0.0003	0.0003	0.0003	0.0003	0.0003	0.0003	0.0003	0.0003	0.0003	0.0003	0.0003	0.0003	0.0003	0.0003	2.4148
GMFG	0.0003	0.0003	0.0003	0.0003	0.0003	0.6857	0.0003	0.0003	0.0003	0.0003	0.0003	0.1204	0.5586	0.1956	0.1924	0.0003	0.7225
FMO1	0.0003	0.0003	0.0003	0.0003	0.0003	0.0298	0.0003	0.0003	0.0003	0.0003	0.0003	0.0003	0.0003	0.5303	0.0003	1.2165	0.7053
HLA-DMA	0.0003	0.0003	0.0003	0.0003	0.0003	0.0003	0.0003	0.0003	0.0003	0.0003	0.0003	0.0003	0.0003	2.5107	0.0003	0.0003	0.0003
FBXO7	0.0003	0.0003	0.0003	0.0003	0.0003	0.0003	0.0003	0.0003	0.0003	0.0003	2.5498	0.0003	0.0003	0.0003	0.0003	0.0003	0.0003
TNNT2	0.0003	0.0003	0.0003	0.0003	0.0003	0.0003	0.0003	0.0003	0.1942	0.0003	0.0003	0.0003	0.0524	0.0003	2.4103	0.0003	0.0003
KERA	0.0003	0.0003	0.0003	0.0003	0.0003	0.0003	0.0003	0.0003	0.0003	0.0003	0.0003	0.0003	0.168	2.4953	0.0003	0.1101	0.0003
TNMD	0.0003	0.0003	0.0003	0.0003	0.0003	0.0003	0.0003	0.0003	2.2041	0.0003	0.0003	0.0003	0.5759	0.0003	0.0003	0.0003	0.0003
GPD1	0.0003	0.0003	0.0003	0.0003	0.0003	0.0003	0.0003	0.0003	0.4558	0.0003	0.0003	0.0003	0.6027	0.0003	0.7689	0.9566	0.0003
PTOV1	0.0003	0.0003	0.0003	0.0003	0.0003	0.0003	0.0003	0.0003	0.0003	2.8608	0.0003	0.0003	0.0003	0.0003	0.0003	0.0003	0.0003
GREM1	0.0003	0.0003	0.0003	0.0003	0.0003	0.0003	0.0003	0.0003	0.0003	0.0003	2.7477	0.1433	0.0003	0.0003	0.0003	0.0003	0.0003
NPL	0.0003	0.0003	0.0003	0.0003	0.0003	0.4257	0.0003	0.0003	0.0003	0.0003	0.0003	0.0003	0.0003	1.2401	0.0003	1.3307	0.0003
GABRG1	0.0003	0.0003	0.0003	0.0003	0.0003	0.0003	0.0003	0.0003	0.0003	0.0003	0.0003	0.0003	0.0003	0.0003	0.0003	0.0003	3.0401
FNDC1	0.0003	0.0003	0.0003	0.0003	0.0003	1.1426	0.0003	0.0003	0.0003	0.0003	0.6742	0.0003	0.0383	0.615	0.0003	0.6458	0.0003
MYL10	0.0003	0.0003	0.0003	0.0003	0.0003	0.0003	0.0003	0.0003	1.1247	0.0003	0.0003	0.0003	0.185	0.0003	1.7089	0.1015	0.0003
RNF14	0.0003	0.0003	0.0003	0.0003	0.0003	0.0003	0.0003	0.0003	0.0003	0.0003	0.0003	0.0003	0.0003	0.0003	0.0003	0.0003	3.3145
IFT20	0.0003	0.0003	0.0003	0.0003	0.0003	0.8156	0.0003	0.0003	0.0003	0.0003	0.0003	0.0003	0.0003	0.7398	0.0003	1.0882	0.7205
PDGFRL	0.0003	0.0003	0.0003	0.0003	0.0003	1.0547	0.0003	0.0003	0.1214	0.3468	0.0003	0.0003	0.0003	0.8875	0.076	0.4478	0.4696
CCS	0.0003	0.0003	0.0003	0.0003	0.0003	0.0003	0.1918	0.1361	0.0003	0.4068	0.0003	0.0003	0.0003	1.8539	0.849	0.0003	0.0003
CINP	0.0003	0.0003	0.0003	0.0003	0.0003	0.0003	0.0003	0.0003	0.0003	0.0003	2.7741	0.0003	0.0003	0.0003	0.8587	0.0003	0.0003
KLHL40	0.0003	0.0003	0.0003	0.0003	0.0003	0.0003	0.0003	0.0003	0.1919	0.0003	0.0003	0.0003	0.322	0.0003	2.8354	0.3571	0.0003
NEB	0.0003	0.0003	0.0003	0.0003	0.0003	0.0003	0.0003	0.0003	0.308	0.0003	0.0003	0.0003	0.2056	0.0003	2.5483	0.7827	0.0003
PTN	0.0003	0.0003	0.0003	0.0003	0.0003	0.0003	0.0003	0.395	0.9023	0.0003	0.0003	0.0003	0.8899	1.0706	0.0003	0.6147	0.0003
SMYD1	0.0003	0.0003	0.0003	0.0003	0.0003	0.0003	0.0003	0.0003	0.0003	0.0003	0.0003	0.0003	0.0003	0.0003	3.9005	0.0003	0.0003
LAMTOR2	0.0003	0.0003	0.0003	0.0003	0.0003	0.6498	0.8811	0.5131	0.0003	0.0003	0.0003	0.0003	0.0003	0.4429	0.0003	0.6292	1.3161
PADI2	0.0003	0.0003	0.0003	0.0003	0.0003	0.0003	0.0003	0.0003	0.2001	0.0003	0.0003	0.028	2.0612	0.0003	1.2526	0.9528	0.0003
ZCCHC6	0.0003	0.0003	0.0003	0.0003	0.0003	0.0003	0.0003	0.0003	0.0003	0.0003	0.0003	0.0003	0.0003	0.0003	0.0003	5.008	0.0003
FABP4	0.0003	0.0003	0.0003	0.0003	0.0003	0.0003	0.1511	0.1532	1.9187	0.0003	0.0003	0.0003	2.8226	0.0003	0.0003	0.0003	0.0003
VIP	0.0003	0.0003	0.0003	0.0003	0.0003	0.0003	3.694	0.6204	0.0003	0.2534	0.5489	0.0003	0.0003	0.0003	0.1328	0.0003	0.0003
MADCAM1	0.0003	0.0003	0.0003	0.0003	0.0003	0.0475	0.0003	0.0003	1.5461	1.9547	0.0003	0.0003	0.6677	0.0003	0.0003	0.6124	0.8904
GP1BB	0.0003	0.0003	0.0003	0.0003	0.0003	0.0003	1.3688	0.0003	0.4072	0.0003	4.0376	0.0003	0.0003	0.0003	0.0003	0.0003	0.0003
MYOZ3	0.0003	0.0003	0.0003	0.0003	0.0003	0.0003	0.0003	0.0003	0.8577	0.0003	0.0003	0.0003	0.0003	0.0003	4.6907	0.4033	0.0003
KDELR3	0.0003	0.0003	0.0003	0.0003	0.0003	0.0003	0.0003	0.0003	0.0003	0.0003	0.0003	0.0003	0.0003	0.0003	0.0003	6.0822	0.0003
ICOSLG	0.0003	0.0003	0.0003	0.0003	0.0003	3.0897	0.0003	0.0003	0.0003	0.0003	0.0003	0.8917	0.0003	0.0003	0.0003	0.0003	2.136
MPZ	0.0003	0.0003	0.0003	0.0003	0.0003	0.0003	2.343	0.0003	0.0003	0.0003	0.0003	0.0003	0.0003	0.0003	0.0003	3.9223	0.0003
CLC	0.0003	0.0003	0.0003	0.0003	0.0003	0.0003	0.3776	0.0003	0.0003	0.0003	0.0003	0.0003	0.0003	5.8938	0.0003	0.0003	0.0003
BCL2L15	0.0003	0.0003	0.0003	0.0003	0.0003	0.0003	0.0003	0.0003	0.0003	0.0003	0.0003	6.3771	0.0003	0.0003	0.0003	0.0003	0.0003
COL10A1	0.0003	0.0003	0.0003	0.0003	0.0003	0.2324	0.11	0.2284	0.2262	2.8293	1.3202	0.1496	1.0022	0.2673	0.3481	0.0003	0.1293
NAGLU	0.0003	0.0003	0.0003	0.0003	0.0003	3.1114	0.0003	0.0003	1.6419	0.0003	0.0003	0.0233	0.0698	0.5186	0.0384	1.385	0.2054
MYBPC2	0.0003	0.0003	0.0003	0.0003	0.0003	0.0003	0.0003	0.0003	0.7672	0.0003	0.0003	0.0003	1.556	0.0003	2.5503	2.1209	0.0003
APOBEC2	0.0003	0.0003	0.0003	0.0003	0.0003	0.0003	0.0003	0.0003	0.9202	0.0003	0.0003	0.0003	0.6904	0.0003	4.4298	1.3635	0.0003
TTN	0.0003	0.0003	0.0003	0.0003	0.0003	0.0003	0.0003	0.0003	0.6119	0.0003	0.0003	0.0003	0.6438	0.0003	5.3954	0.9535	0.0046
ACP5	0.0003	0.0003	0.0003	0.0003	0.0003	4.1072	0.0003	0.0003	0.0003	0.0003	0.0003	0.0003	1.47	0.23	0.0003	2.7846	0.0003
CDC26	0.0003	0.0003	0.0003	0.0003	0.0003	0.0003	0.0003	0.0003	0.0003	0.0003	0.0003	0.0003	0.0003	0.0003	3.9904	1.5398	3.62
MURC	0.0003	0.0003	0.0003	0.0003	0.0003	0.0003	0.0003	0.0003	1.0388	0.0003	0.0003	0.0003	0.516	0.0003	7.2815	1.0483	0.0003
NUAK1	0.0003	0.0003	0.0003	0.0003	0.0003	0.0003	4.6076	5.2866	0.0003	0.0003	0.2507	0.0003	0.0003	0.0003	0.0003	0.0003	0.2651
MYOM1	0.0003	0.0003	0.0003	0.0003	0.0003	0.0003	0.0003	0.0003	0.8699	0.0003	0.0003	0.0003	0.5794	0.0003	7.5972	1.4349	0.0003
MYOZ2	0.0003	0.0003	0.0003	0.0003	0.0003	0.0003	0.0003	0.0003	0.513	0.0003	0.0003	0.0003	0.0003	0.0003	12.3361	0.0003	0.0003
MYOM2	0.0003	0.0003	0.0003	0.0003	0.0003	0.0003	0.0003	0.0003	1.2269	0.0003	0.0003	0.0003	1.2561	0.0003	9.3424	2.3741	0.0003
SRL	0.0003	0.0003	0.0003	0.0003	0.0003	0.0003	0.0003	0.0003	3.1875	0.0003	0.0003	0.0003	0.0003	0.0003	10.2861	1.9177	0.0003
CASQ2	0.0003	0.0003	0.0003	0.0003	0.0003	0.0003	0.0003	0.0003	0.5539	0.0003	0.0003	0.0003	3.0585	0.0003	11.2781	1.3138	0.0003
THAP3	0.0003	0.0003	0.0003	0.0003	0.0003	5.231	0.8393	0.375	2.0464	2.5041	1.5705	0.0003	3.8079	0.0003	0.6066	1.4204	0.0003
TRIM72	0.0003	0.0003	0.0003	0.0003	0.0003	0.0003	0.0003	0.0003	1.6177	0.0003	0.0003	0.0003	3.6251	0.0003	11.889	2.147	0.0003
KLHL41	0.0003	0.0003	0.0003	0.0003	0.0003	0.0003	0.0003	0.0003	0.0204	0.0003	0.0003	0.0003	1.2186	0.0003	18.0667	0.8111	0.0003
MYOT	0.0003	0.0003	0.0003	0.0003	0.0003	0.0003	0.0003	0.0003	2.8026	0.0003	0.0003	0.0003	0.5597	0.0003	20.8964	0.319	0.0003
MYBPC1	0.0003	0.0003	0.0003	0.0003	0.0003	0.0003	0.0003	0.0003	2.7291	0.0003	0.0003	0.0003	2.6477	0.0003	22.6661	3.7808	0.0003
IGLL1	0.0003	0.0003	0.0003	0.0003	0.0003	3.0256	0.3619	0.4353	0.5205	1.2054	0.3003	0.4958	16.1441	4.3699	2.297	3.2132	0.0003
CSRP3	0.0003	0.0003	0.0003	0.0003	0.0003	0.0003	0.0003	0.0003	1.0449	0.0003	0.0003	0.0003	0.0003	0.0003	31.2393	1.3296	0.0003
TNNC1	0.0003	0.0003	0.0003	0.0003	0.0003	0.0003	0.0003	0.0003	7.8154	0.0003	0.0003	0.0003	2.1652	0.0003	31.8276	0.0003	0.0003
TNNT3	0.0003	0.0003	0.0003	0.0003	0.0003	0.0003	0.0003	0.0003	9.9852	0.0003	0.0003	0.0003	10.8132	0.0003	5.2696	16.0758	0.0003
TNNT1	0.0003	0.0003	0.0003	0.0003	0.0003	0.0003	0.0003	0.0003	7.6031	0.0003	0.0003	0.0003	0.064	0.0003	80.4611	0.2293	0.0003
MYL3	0.0003	0.0003	0.0003	0.0003	0.0003	0.0003	0.0003	0.0003	2.8088	0.0003	0.0003	0.0003	2.1104	0.0003	85.8342	1.5779	0.0003
MYL2	0.0003	0.0003	0.0003	0.0003	0.0003	0.0003	0.0003	0.0003	4.3872	0.0003	0.0003	0.0003	2.701	0.0003	92.8239	0.1421	0.0003
CASQ1	0.0003	0.0003	0.0003	0.0003	0.0003	0.0003	0.0003	0.0003	18.9772	0.0003	0.0003	0.0003	16.5631	0.0003	63.8699	14.4637	0.0003
TNNI1	0.0003	0.0003	0.0003	0.0003	0.0003	0.0003	0.0003	0.0003	9.6739	0.0003	0.0003	0.0003	7.5444	0.0003	204.988	6.754	0.0003
HMCN1	0.0003	0.0003	0.001	0.0003	0.0003	0.0133	0.0003	0.0003	0.0528	0.0003	0.0003	0.0003	0.0319	0.2042	0.0025	0.0771	0.0072
KIF16B	0.0003	0.0003	0.002	0.0003	0.0003	0.0113	0.003	0.0003	0.0003	0.0003	0.0003	0.0003	0.0003	0.0003	0.0003	0.0003	0.0003
CEP290	0.0003	0.0003	0.0003	0.002	0.0003	0.0003	0.0451	0.0003	0.0003	0.0003	0.0003	0.0003	0.0003	0.0054	0.0025	0.0003	0.0032
KIF1A	0.0003	0.0003	0.0021	0.0003	0.0003	0.0205	0.0013	0.0003	0.0003	0.0003	0.0003	0.0003	0.0003	0.0003	0.0003	0.0457	0.0679
ASAP1	0.0003	0.0023	0.0003	0.0003	0.0003	0.0003	0.005	0.0003	0.0003	0.0003	0.0003	0.0003	0.0003	0.0003	0.0429	0.0003	0.0003
KIF1C	0.0003	0.0003	0.0023	0.0003	0.0003	0.0306	0.0003	0.0003	0.0003	0.0003	0.0003	0.0003	0.0003	0.0003	0.0003	0.0682	0.1012
KIF1B	0.0003	0.0003	0.0025	0.0003	0.0003	0.0243	0.0003	0.0003	0.0003	0.0003	0.0003	0.0003	0.0003	0.0003	0.0003	0.0542	0.0805
ASAP2	0.0003	0.0027	0.0003	0.0003	0.0003	0.0003	0.0059	0.0003	0.0003	0.0003	0.0003	0.0003	0.0003	0.0003	0.0003	0.0003	0.0003
GUCY1A2	0.0003	0.0003	0.0028	0.0003	0.0003	0.0003	0.0003	0.0003	0.0003	0.0003	0.0003	0.0003	0.0003	0.0003	0.0003	0.0003	0.0003
PRRC2A	0.0003	0.0003	0.003	0.0003	0.0003	0.0003	0.0003	0.0003	0.0003	0.0003	0.0003	0.0003	0.0003	0.0003	0.0003	0.0003	0.0003
NIPBL	0.0003	0.0033	0.0003	0.0003	0.0003	0.0003	0.0003	0.0003	0.0003	0.0003	0.0003	0.0003	0.0003	0.0003	0.0003	0.0003	0.0003
ERBB4	0.0036	0.0003	0.0003	0.0003	0.0003	0.0003	0.0003	0.0003	0.0003	0.0003	0.0003	0.0003	0.0003	0.0003	0.0003	0.0003	0.0003
LAMC3	0.0003	0.0003	0.0036	0.0003	0.0003	0.0003	0.0106	0.0003	0.0003	0.0003	0.0003	0.0003	0.0003	0.0003	0.0003	0.0003	0.0003
CREBBP	0.0003	0.0041	0.0003	0.0003	0.0003	0.0003	0.0003	0.0003	0.0003	0.0003	0.0003	0.0003	0.0003	0.0003	0.0003	0.0003	0.0003
KIF21B	0.0003	0.0003	0.0041	0.0003	0.0003	0.0003	0.0003	0.0003	0.0003	0.0003	0.0003	0.0003	0.0003	0.0003	0.0003	0.0003	0.0003
MAP3K9	0.0041	0.0003	0.0003	0.0003	0.0003	0.0003	0.0003	0.0003	0.0003	0.0003	0.0003	0.0003	0.0003	0.0003	0.0003	0.0003	0.0003
DDX60	0.0003	0.0042	0.0003	0.0003	0.0003	0.0003	0.0003	0.0003	0.0003	0.0003	0.0003	0.0003	0.0003	0.0003	0.0003	0.0003	0.0003
KIF3C	0.0003	0.0042	0.0003	0.0003	0.0003	0.0003	0.0003	0.0003	0.0003	0.0003	0.0003	0.0003	0.0003	0.0003	0.0003	0.0003	0.0003
EP300	0.0003	0.0043	0.0003	0.0003	0.0003	0.0003	0.0003	0.0003	0.0003	0.0003	0.0003	0.0003	0.0003	0.0003	0.0003	0.0003	0.0003
NOTCH1	0.0003	0.0043	0.0003	0.0003	0.0003	0.0003	0.0003	0.0003	0.0003	0.0003	0.0003	0.0003	0.0003	0.0003	0.0003	0.0003	0.0003
ARHGEF12	0.0003	0.0046	0.0003	0.0003	0.0003	0.0003	0.0003	0.0003	0.0003	0.0003	0.0003	0.0003	0.0003	0.0003	0.0003	0.0003	0.0003
KIAA1804	0.0046	0.0003	0.0003	0.0003	0.0003	0.0003	0.0003	0.0003	0.0003	0.0003	0.0003	0.0003	0.0003	0.0003	0.0003	0.0003	0.0003
NOTCH2	0.0003	0.0046	0.0003	0.0003	0.0003	0.0003	0.0003	0.0003	0.0003	0.0003	0.0003	0.0003	0.0003	0.0003	0.0003	0.0003	0.0003
TGM4	0.0003	0.0003	0.0046	0.0003	0.0003	0.0003	0.0003	0.0022	0.0003	0.0003	0.0003	0.0003	0.0003	0.0003	0.0003	0.0003	0.0003
KIF3B	0.0003	0.0048	0.0003	0.0003	0.0003	0.0003	0.0003	0.0003	0.0003	0.0003	0.0003	0.0003	0.0003	0.0003	0.0003	0.0003	0.0003
MAP3K10	0.005	0.0003	0.0003	0.0003	0.0003	0.0003	0.0003	0.0003	0.0003	0.0003	0.0003	0.0003	0.0003	0.0003	0.0003	0.0003	0.0003
LOC101060714	0.0003	0.0003	0.0051	0.0003	0.0003	0.0386	0.0003	0.0172	0.0003	0.0003	0.0003	0.0003	0.1253	0.0154	0.0003	0.0003	0.0003
SULT1A3	0.0003	0.0003	0.0051	0.0003	0.0003	0.0386	0.0003	0.0172	0.0003	0.0003	0.0003	0.0003	0.1253	0.0154	0.0003	0.0003	0.0003
SULT1A4	0.0003	0.0003	0.0051	0.0003	0.0003	0.0386	0.0003	0.0172	0.0003	0.0003	0.0003	0.0003	0.1253	0.0154	0.0003	0.0003	0.0003
CNNM3	0.0003	0.0052	0.0003	0.0003	0.0003	0.0003	0.0003	0.0003	0.0003	0.0003	0.0003	0.0003	0.0003	0.0003	0.0003	0.0003	0.0003
INTS1	0.0003	0.0055	0.0003	0.0003	0.0003	0.0003	0.0003	0.0003	0.0003	0.0003	0.0003	0.0003	0.0003	0.0003	0.0003	0.0003	0.0003
TTC28	0.0003	0.0003	0.0003	0.0003	0.0055	0.0003	0.0003	0.0003	0.0003	0.0003	0.0003	0.0003	0.0003	0.0003	0.0003	0.0003	0.0094
MAP3K11	0.0056	0.0003	0.0003	0.0003	0.0003	0.0003	0.0003	0.0003	0.0003	0.0003	0.0003	0.0003	0.0003	0.0003	0.0003	0.0003	0.0003
GIGYF2	0.0003	0.0057	0.0003	0.0003	0.0003	0.0003	0.0003	0.0003	0.0003	0.0003	0.0003	0.0003	0.0003	0.0003	0.0003	0.0003	0.0003
RICTOR	0.0003	0.0003	0.0057	0.0003	0.0003	0.0003	0.0003	0.0003	0.0003	0.0003	0.0003	0.0003	0.0003	0.0003	0.0003	0.0003	0.0003
NEO1	0.0003	0.0003	0.0057	0.0003	0.0003	0.0003	0.0122	0.0003	0.0003	0.0003	0.0003	0.0003	0.0003	0.0003	0.0003	0.0003	0.0003
GEMIN5	0.0003	0.0003	0.0057	0.0003	0.0003	0.0003	0.0003	0.0003	0.0003	0.0003	0.0003	0.0003	0.0003	0.0003	0.0003	0.2395	0.0003
DOCK4	0.0003	0.0003	0.0059	0.0003	0.0003	0.0003	0.0003	0.0003	0.0003	0.0003	0.0003	0.0003	0.0003	0.0003	0.0003	0.0003	0.0003
TBC1D8B	0.0003	0.0062	0.0003	0.0003	0.0003	0.0306	0.0003	0.0003	0.0003	0.0003	0.0003	0.0003	0.0003	0.0713	0.0003	0.1036	0.0271
ITSN2	0.0003	0.0003	0.0063	0.0003	0.0003	0.0003	0.0003	0.0003	0.0003	0.0003	0.0003	0.0003	0.0003	0.0003	0.0003	0.0003	0.0003
MYO15A	0.0003	0.0003	0.0003	0.0003	0.0063	0.0003	0.0003	0.0003	0.0003	0.0003	0.0003	0.0003	0.0003	0.0003	0.0003	0.0003	0.0003
NBEA	0.0063	0.0003	0.0003	0.0003	0.0003	0.0003	0.0003	0.0003	0.0003	0.0003	0.0003	0.0003	0.0003	0.0003	0.0015	0.0003	0.0003
LUZP1	0.0003	0.0003	0.0064	0.0003	0.0003	0.0003	0.0003	0.0003	0.0003	0.0003	0.0003	0.0032	0.0003	0.0003	0.0003	0.0003	0.0003
HDAC4	0.0003	0.0003	0.0003	0.0003	0.0071	0.0003	0.0003	0.0003	0.0003	0.0003	0.0003	0.0003	0.0003	0.0003	0.0003	0.0003	0.0003
SMEK2	0.0003	0.0072	0.0003	0.0003	0.0003	0.0003	0.0003	0.0003	0.0003	0.0003	0.0003	0.0003	0.0003	0.0003	0.0003	0.0003	0.0003
UTP20	0.0003	0.0073	0.0003	0.0003	0.0003	0.0003	0.0003	0.0003	0.0003	0.0003	0.0003	0.0003	0.0003	0.0003	0.0003	0.0003	0.0003
RGPD8	0.0075	0.0003	0.0003	0.0003	0.0003	0.0006	0.0003	0.0003	0.0003	0.0003	0.0003	0.0003	0.0003	0.0003	0.0003	0.0003	0.0003
NBAS	0.0003	0.0003	0.0075	0.0003	0.0003	0.0071	0.0003	0.0003	0.0003	0.0003	0.0003	0.0003	0.0003	0.0029	0.0084	0.0003	0.0003
ADPGK	0.0003	0.0003	0.0075	0.0003	0.0003	0.059	0.0003	0.0003	0.035	0.0003	0.0356	0.0003	0.0446	0.0609	0.0214	0.0721	0.0003
SEC16A	0.0076	0.0003	0.0003	0.0003	0.0003	0.0003	0.0003	0.0003	0.0003	0.0003	0.0003	0.0003	0.0003	0.0003	0.0003	0.0003	0.0003
SLIT2	0.0003	0.0003	0.008	0.0003	0.0003	0.0084	0.0073	0.0003	0.0003	0.0003	0.0003	0.0003	0.0003	0.0003	0.0003	0.0003	0.0003
CPA4	0.0003	0.0081	0.0003	0.0003	0.0003	0.0003	0.0003	0.0003	0.0003	0.0003	0.0003	0.0003	0.0003	0.0003	0.0003	0.0003	0.0003
BCAS1	0.0003	0.0082	0.0003	0.0003	0.0003	0.0003	0.0003	0.0003	0.0003	0.0003	0.0003	0.0003	0.0003	0.0003	0.0003	0.0003	0.0003
DOPEY2	0.0083	0.0003	0.0003	0.0003	0.0003	0.0003	0.0003	0.0003	0.0003	0.0003	0.0003	0.0003	0.0003	0.0003	0.0003	0.0003	0.0003
SMCHD1	0.0003	0.0003	0.0063	0.0023	0.0003	0.0003	0.0003	0.0003	0.0003	0.0003	0.0003	0.0003	0.0003	0.0003	0.0003	0.0003	0.0203
CEP250	0.0003	0.0003	0.0084	0.0003	0.0003	0.0003	0.0003	0.0003	0.0003	0.0003	0.0003	0.0003	0.0003	0.0003	0.0003	0.0003	0.0489
PIK3R4	0.0084	0.0003	0.0003	0.0003	0.0003	0.0189	0.0085	0.0141	0.0048	0.0003	0.0003	0.0003	0.0216	0.034	0.0003	0.0224	0.0509
ABCB1	0.0086	0.0003	0.0003	0.0003	0.0003	0.0003	0.0003	0.0003	0.0003	0.0003	0.0003	0.0003	0.0003	0.0003	0.0003	0.0003	0.0003
CTNND2	0.0003	0.0003	0.0089	0.0003	0.0003	0.0003	0.0003	0.0003	0.0003	0.0003	0.0003	0.0003	0.0003	0.0003	0.0003	0.0003	0.0003
PTPRK	0.0003	0.0092	0.0003	0.0003	0.0003	0.0003	0.0003	0.0003	0.0003	0.0003	0.0003	0.0003	0.0003	0.0003	0.0003	0.0003	0.0003
RDH14	0.0003	0.0003	0.0092	0.0003	0.0003	0.0003	0.0318	0.0351	0.0003	0.0003	0.0003	0.0003	0.0003	0.0003	0.0003	0.0003	0.0003
SYMPK	0.0003	0.0094	0.0003	0.0003	0.0003	0.0003	0.0003	0.0003	0.0003	0.0003	0.0003	0.0003	0.0003	0.0003	0.0003	0.0003	0.0003
GNAT2	0.0003	0.0003	0.0073	0.0003	0.0025	0.0003	0.0061	0.0014	0.0003	0.0003	0.0003	0.0003	0.0003	0.0003	0.0021	0.0003	0.0003
GNAT3	0.0003	0.0003	0.0073	0.0003	0.0025	0.0003	0.0061	0.0014	0.0003	0.0003	0.0003	0.0003	0.0003	0.0003	0.0021	0.0003	0.0003
ERBB2IP	0.0003	0.0003	0.0003	0.0003	0.0098	0.4253	0.0003	0.0003	0.0003	0.0003	0.0003	0.0003	0.0003	0.0003	0.0003	0.0003	1.0897
BMS1	0.0003	0.0099	0.0003	0.0003	0.0003	0.0003	0.0003	0.0003	0.0003	0.0003	0.0003	0.0003	0.0003	0.0003	0.0003	0.0003	0.0003
POGZ	0.0003	0.0003	0.0099	0.0003	0.0003	0.0003	0.0003	0.0003	0.0003	0.0003	0.0003	0.0003	0.0003	0.0003	0.0003	0.0003	0.0003
COG4	0.0003	0.0099	0.0003	0.0003	0.0003	0.0118	0.0003	0.0003	0.0003	0.0003	0.0003	0.0003	0.0003	0.0003	0.0003	0.0003	0.0003
INPPL1	0.0003	0.0003	0.0003	0.0003	0.01	0.0003	0.0003	0.0003	0.0003	0.2216	0.0003	0.0003	0.0943	0.0067	0.1765	0.1443	0.0101
GNAT1	0.0003	0.0003	0.0077	0.0003	0.0027	0.0003	0.0065	0.0015	0.0003	0.0003	0.0003	0.0003	0.0003	0.0003	0.0022	0.0003	0.0003
PCDHGC5	0.0003	0.0003	0.0003	0.0102	0.0003	0.0003	0.0003	0.0003	0.0003	0.0003	0.0003	0.0003	0.0003	0.0003	0.0003	0.0003	0.0003
PHKA1	0.0003	0.0003	0.0102	0.0003	0.0003	0.0003	0.0003	0.0003	0.0003	0.0003	0.0003	0.0003	0.0003	0.0003	0.0003	0.0003	0.0003
PLXND1	0.0003	0.0053	0.0003	0.0003	0.0053	0.0099	0.0003	0.0003	0.0003	0.009	0.0003	0.0003	0.0091	0.0102	0.0129	0.0122	0.0079
PCDHGA3	0.0003	0.0003	0.0003	0.0104	0.0003	0.0003	0.0003	0.0003	0.0003	0.0003	0.0003	0.0003	0.0003	0.0003	0.0003	0.0003	0.0003
PCDHGC4	0.0003	0.0003	0.0003	0.0104	0.0003	0.0003	0.0003	0.0003	0.0003	0.0003	0.0003	0.0003	0.0003	0.0003	0.0003	0.0003	0.0003
ARHGEF40	0.0003	0.0003	0.0104	0.0003	0.0003	0.02	0.0003	0.0003	0.0003	0.0003	0.0003	0.0061	0.0003	0.0003	0.0003	0.0172	0.0003
RNF20	0.0003	0.0003	0.0105	0.0003	0.0003	0.0003	0.0003	0.0003	0.0003	0.0003	0.0003	0.0003	0.0003	0.0003	0.0003	0.0003	0.0003
SAMD4A	0.0003	0.0003	0.0105	0.0003	0.0003	0.0003	0.0003	0.0003	0.0003	0.0003	0.0003	0.0003	0.0003	0.0003	0.0003	0.0003	0.0003
HECTD1	0.0107	0.0003	0.0003	0.0003	0.0003	0.0003	0.0003	0.0003	0.0003	0.0003	0.0003	0.0003	0.0003	0.0003	0.0003	0.0003	0.0003
PCDHGA6	0.0003	0.0003	0.0003	0.0107	0.0003	0.0003	0.0003	0.0003	0.0003	0.0003	0.0003	0.0003	0.0003	0.0003	0.0003	0.0003	0.0003
PCDHGB3	0.0003	0.0003	0.0003	0.0107	0.0003	0.0003	0.0003	0.0003	0.0003	0.0003	0.0003	0.0003	0.0003	0.0003	0.0003	0.0003	0.0003
PCDHGB6	0.0003	0.0003	0.0003	0.0107	0.0003	0.0003	0.0003	0.0003	0.0003	0.0003	0.0003	0.0003	0.0003	0.0003	0.0003	0.0003	0.0003
ARFGEF2	0.0003	0.0108	0.0003	0.0003	0.0003	0.0003	0.0003	0.0003	0.0003	0.0003	0.0003	0.0003	0.0003	0.0003	0.0003	0.0003	0.0003
TMPRSS13	0.0108	0.0003	0.0003	0.0003	0.0003	0.0003	0.0003	0.0003	0.0003	0.0003	0.0003	0.0003	0.0003	0.0003	0.0003	0.0003	0.0003
NISCH	0.0003	0.0003	0.0003	0.0003	0.0108	0.0214	0.0003	0.0003	0.0003	0.0003	0.0003	0.0003	0.0003	0.0003	0.0003	0.0245	0.0003
FZD6	0.0109	0.0003	0.0003	0.0003	0.0003	0.0003	0.0003	0.0003	0.0003	0.0003	0.0003	0.0003	0.0003	0.0003	0.0003	0.0003	0.0003
PCDHGA2	0.0003	0.0003	0.0003	0.0109	0.0003	0.0003	0.0003	0.0003	0.0003	0.0003	0.0003	0.0003	0.0003	0.0003	0.0003	0.0003	0.0003
CPSF1	0.0003	0.0109	0.0003	0.0003	0.0003	0.0003	0.0003	0.0003	0.0003	0.0003	0.0003	0.0003	0.0003	0.0003	0.0003	0.0003	0.0481
DENND4C	0.0003	0.011	0.0003	0.0003	0.0003	0.0003	0.0003	0.0003	0.0003	0.0003	0.0003	0.0003	0.0003	0.0003	0.0003	0.0003	0.0003
ANKRD28	0.0003	0.0111	0.0003	0.0003	0.0003	0.0003	0.0003	0.0003	0.0003	0.0003	0.0003	0.0003	0.0003	0.0003	0.0003	0.0003	0.0003
RXRA	0.0003	0.0003	0.0111	0.0003	0.0003	0.0003	0.0003	0.0003	0.0003	0.0003	0.0003	0.0003	0.0003	0.0003	0.0003	0.0003	0.0003
RGPD5	0.0111	0.0003	0.0003	0.0003	0.0003	0.0006	0.0003	0.0003	0.0003	0.0003	0.0003	0.0003	0.0003	0.0003	0.0003	0.0003	0.0003
RGPD6	0.0111	0.0003	0.0003	0.0003	0.0003	0.0006	0.0003	0.0003	0.0003	0.0003	0.0003	0.0003	0.0003	0.0003	0.0003	0.0003	0.0003
FCGBP	0.0003	0.0111	0.0003	0.0003	0.0003	0.0003	0.0003	0.0003	0.0134	0.0003	0.0003	0.0003	0.0003	0.0244	0.0003	0.0003	0.0291
PCDHGA5	0.0003	0.0003	0.0003	0.0112	0.0003	0.0003	0.0003	0.0003	0.0003	0.0003	0.0003	0.0003	0.0003	0.0003	0.0003	0.0003	0.0003
PCDHGB7	0.0003	0.0003	0.0003	0.0112	0.0003	0.0003	0.0003	0.0003	0.0003	0.0003	0.0003	0.0003	0.0003	0.0003	0.0003	0.0003	0.0003
HTT	0.0047	0.0039	0.0003	0.0003	0.0033	0.0003	0.0003	0.0003	0.0003	0.0003	0.0003	0.0003	0.0003	0.0003	0.0003	0.0003	0.0003
CCDC88B	0.0003	0.0003	0.0003	0.0113	0.0003	0.0003	0.0003	0.0003	0.0003	0.0003	0.0094	0.0003	0.0003	0.0003	0.014	0.0003	0.0003
PCDHGA9	0.0003	0.0003	0.0003	0.0114	0.0003	0.0003	0.0003	0.0003	0.0003	0.0003	0.0003	0.0003	0.0003	0.0003	0.0003	0.0003	0.0003
RXRG	0.0003	0.0003	0.0115	0.0003	0.0003	0.0003	0.0003	0.0003	0.0003	0.0003	0.0003	0.0003	0.0003	0.0003	0.0003	0.0003	0.0003
DCAF11	0.0003	0.0116	0.0003	0.0003	0.0003	0.0003	0.0003	0.0003	0.0003	0.0003	0.0003	0.0003	0.0003	0.0003	0.0003	0.0003	0.0003
PCDHGB1	0.0003	0.0003	0.0003	0.0117	0.0003	0.0003	0.0003	0.0003	0.0003	0.0003	0.0003	0.0003	0.0003	0.0003	0.0003	0.0003	0.0003
PCDHGB2	0.0003	0.0003	0.0003	0.0117	0.0003	0.0003	0.0003	0.0003	0.0003	0.0003	0.0003	0.0003	0.0003	0.0003	0.0003	0.0003	0.0003
PCDHGB5	0.0003	0.0003	0.0003	0.0117	0.0003	0.0003	0.0003	0.0003	0.0003	0.0003	0.0003	0.0003	0.0003	0.0003	0.0003	0.0003	0.0003
PLXNC1	0.0003	0.006	0.0003	0.0003	0.006	0.0112	0.0003	0.0003	0.0003	0.0102	0.0003	0.0003	0.0103	0.0116	0.0146	0.0138	0.009
PCYT2	0.0003	0.0118	0.0003	0.0003	0.0003	0.0003	0.0263	0.0003	0.0003	0.0003	0.0003	0.0003	0.0003	0.0003	0.0003	0.0003	0.0003
TRIP12	0.0003	0.0119	0.0003	0.0003	0.0003	0.0069	0.0003	0.0003	0.0003	0.0003	0.0054	0.0003	0.0003	0.0003	0.0066	0.0003	0.014
PCDHGA8	0.0003	0.0003	0.0003	0.012	0.0003	0.0003	0.0003	0.0003	0.0003	0.0003	0.0003	0.0003	0.0003	0.0003	0.0003	0.0003	0.0003
NAA25	0.0003	0.012	0.0003	0.0003	0.0003	0.0003	0.0003	0.0093	0.0003	0.0003	0.0003	0.0003	0.0003	0.0003	0.0003	0.0003	0.0003
ARHGAP26	0.0003	0.0003	0.0121	0.0003	0.0003	0.0003	0.0003	0.0003	0.0003	0.0003	0.0003	0.0003	0.0003	0.0003	0.0003	0.0003	0.0003
TRPM4	0.0121	0.0003	0.0003	0.0003	0.0003	0.0003	0.0003	0.0003	0.0003	0.0003	0.0003	0.0003	0.0003	0.0003	0.0003	0.0003	0.0003
GOLGA4	0.01	0.0024	0.0003	0.0003	0.0003	0.0003	0.0003	0.0003	0.0003	0.0003	0.0003	0.0003	0.0003	0.0003	0.0099	0.009	0.0003
YLPM1	0.0003	0.0097	0.0003	0.0027	0.0003	0.0104	0.0003	0.0003	0.0003	0.0003	0.0003	0.0003	0.0003	0.0003	0.0003	0.0003	0.0117
BOP1	0.0123	0.0003	0.0003	0.0003	0.0003	0.0003	0.0003	0.0003	0.0003	0.0003	0.0003	0.0003	0.0003	0.0003	0.0003	0.0003	0.0003
PCDHGA10	0.0003	0.0003	0.0003	0.0123	0.0003	0.0003	0.0003	0.0003	0.0003	0.0003	0.0003	0.0003	0.0003	0.0003	0.0003	0.0003	0.0003
PCDHGA7	0.0003	0.0003	0.0003	0.0123	0.0003	0.0003	0.0003	0.0003	0.0003	0.0003	0.0003	0.0003	0.0003	0.0003	0.0003	0.0003	0.0003
PPIP5K1	0.0124	0.0003	0.0003	0.0003	0.0003	0.0003	0.0003	0.0003	0.0003	0.0003	0.0003	0.0003	0.0003	0.0003	0.0003	0.0003	0.0003
RNASEL	0.0003	0.0124	0.0003	0.0003	0.0003	0.0003	0.0003	0.0003	0.0003	0.0003	0.0003	0.0003	0.0003	0.0003	0.0003	0.0003	0.0177
LIG3	0.0003	0.0126	0.0003	0.0003	0.0003	0.0003	0.0003	0.008	0.0003	0.0003	0.0077	0.0003	0.0003	0.0003	0.0111	0.1705	0.0449
PCDHGA12	0.0003	0.0003	0.0003	0.0127	0.0003	0.0003	0.0003	0.0003	0.0003	0.0003	0.0003	0.0003	0.0003	0.0003	0.0003	0.0003	0.0003
PCDHGA4	0.0003	0.0003	0.0003	0.0127	0.0003	0.0003	0.0003	0.0003	0.0003	0.0003	0.0003	0.0003	0.0003	0.0003	0.0003	0.0003	0.0003
VILL	0.0003	0.0127	0.0003	0.0003	0.0003	0.0003	0.0003	0.0003	0.0003	0.0003	0.0003	0.0003	0.0003	0.0003	0.0003	0.0003	0.0003
CGNL1	0.0003	0.0003	0.0127	0.0003	0.0003	0.0252	0.0142	0.0003	0.0003	0.0003	0.0003	0.0003	0.0003	0.0207	0.0003	0.0097	0.0404
ASCC3	0.0003	0.0086	0.0044	0.0003	0.0003	0.0256	0.0038	0.0003	0.0019	0.0003	0.0003	0.0031	0.0037	0.0279	0.0326	0.0614	0.043
TBC1D4	0.0128	0.0003	0.0003	0.0003	0.0003	0.0003	0.0003	0.0003	0.0003	0.0003	0.0003	0.0003	0.0003	0.0003	0.0003	0.0003	0.0335
KIAA0020	0.0003	0.0129	0.0003	0.0003	0.0003	0.0003	0.0003	0.0003	0.0003	0.0003	0.0003	0.0003	0.0003	0.0003	0.0003	0.0003	0.0003
NCF4	0.0003	0.0129	0.0003	0.0003	0.0003	0.5753	0.0003	0.0003	0.0003	0.0003	0.0003	0.0003	0.2325	0.3544	0.0003	0.4229	0.0003
TMOD4	0.0003	0.0003	0.013	0.0003	0.0003	0.0003	0.0003	0.0003	0.0003	0.0003	0.0003	0.0003	0.0003	0.0003	0.0696	0.0003	0.0003
RASA3	0.0003	0.0003	0.0003	0.013	0.0003	0.0273	0.0003	0.0003	0.0003	0.0003	0.014	0.0285	0.0003	0.0003	0.042	0.0271	0.0679
PPIP5K2	0.0131	0.0003	0.0003	0.0003	0.0003	0.0003	0.0003	0.0003	0.0003	0.0003	0.0003	0.0003	0.0003	0.0003	0.0003	0.0003	0.0003
RASA4	0.0003	0.0003	0.0133	0.0003	0.0003	0.0003	0.0003	0.0003	0.0003	0.0003	0.0003	0.0003	0.0003	0.0003	0.0003	0.0003	0.0003
TTC39C	0.0003	0.0133	0.0003	0.0003	0.0003	0.0003	0.0003	0.0003	0.0003	0.0003	0.0003	0.0003	0.0003	0.0003	0.0003	0.0003	0.0003
PCDHGA1	0.0003	0.0003	0.0003	0.0134	0.0003	0.0003	0.0003	0.0003	0.0003	0.0003	0.0003	0.0003	0.0003	0.0003	0.0003	0.0003	0.0003
PCDHGB4	0.0003	0.0003	0.0003	0.0134	0.0003	0.0003	0.0003	0.0003	0.0003	0.0003	0.0003	0.0003	0.0003	0.0003	0.0003	0.0003	0.0003
AHDC1	0.0003	0.0003	0.0137	0.0003	0.0003	0.0003	0.0003	0.0003	0.0003	0.0003	0.0003	0.0003	0.0003	0.0003	0.0003	0.0003	0.0003
UBR1	0.0003	0.0003	0.0137	0.0003	0.0003	0.0003	0.0003	0.0003	0.0003	0.0003	0.0003	0.0003	0.0003	0.0003	0.0003	0.0003	0.0003
VWA9	0.0003	0.0137	0.0003	0.0003	0.0003	0.1309	0.0003	0.0003	0.0003	0.0003	0.0003	0.0003	0.0003	0.0003	0.0003	0.0215	0.0003
FAM120C	0.0003	0.0138	0.0003	0.0003	0.0003	0.0003	0.0003	0.0003	0.0003	0.0003	0.0003	0.0003	0.0003	0.0003	0.0003	0.0003	0.0003
MOV10	0.0003	0.0003	0.0138	0.0003	0.0003	0.0153	0.0003	0.0003	0.0003	0.0003	0.0003	0.0003	0.0003	0.0115	0.0003	0.0003	0.0251
RASA4B	0.0003	0.0003	0.0139	0.0003	0.0003	0.0003	0.0003	0.0003	0.0003	0.0003	0.0003	0.0003	0.0003	0.0003	0.0003	0.0003	0.0003
DEDD	0.0003	0.0003	0.0141	0.0003	0.0003	0.0003	0.0003	0.0003	0.0003	0.0003	0.0003	0.0003	0.0003	0.0003	0.0003	0.0003	0.0003
PCDHGA11	0.0003	0.0003	0.0003	0.0141	0.0003	0.0003	0.0003	0.0003	0.0003	0.0003	0.0003	0.0003	0.0003	0.0003	0.0003	0.0003	0.0003
VPS39	0.0003	0.0003	0.0141	0.0003	0.0003	0.035	0.0003	0.0003	0.0003	0.0003	0.0003	0.0003	0.0003	0.0245	0.0003	0.0003	0.093
ELMSAN1	0.0003	0.0003	0.0142	0.0003	0.0003	0.0003	0.0003	0.0003	0.0003	0.0003	0.0003	0.0003	0.0003	0.0003	0.0003	0.0003	0.0003
RINT1	0.0142	0.0003	0.0003	0.0003	0.0003	0.0003	0.0003	0.0003	0.0003	0.0003	0.0003	0.0003	0.0003	0.0003	0.0003	0.0003	0.0003
SUPV3L1	0.0003	0.0003	0.0142	0.0003	0.0003	0.0003	0.0003	0.0068	0.0003	0.0003	0.0003	0.0003	0.0003	0.0003	0.0003	0.0003	0.0003
PHF14	0.0003	0.0142	0.0003	0.0003	0.0003	0.0003	0.0003	0.0003	0.0003	0.0003	0.0003	0.0003	0.0003	0.0003	0.0003	0.0003	0.0305
PHKB	0.0003	0.0003	0.0003	0.0144	0.0003	0.0003	0.0003	0.0003	0.0003	0.0003	0.0003	0.0003	0.0003	0.0003	0.0003	0.0003	0.0003
SLC25A51	0.0003	0.0003	0.0003	0.0003	0.0145	0.0003	0.0003	0.0003	0.0003	0.0003	0.0003	0.0003	0.0003	0.0003	0.0003	0.0003	0.0003
SLC25A52	0.0003	0.0003	0.0003	0.0003	0.0145	0.0003	0.0003	0.0003	0.0003	0.0003	0.0003	0.0003	0.0003	0.0003	0.0003	0.0003	0.0003
ACSS2	0.0003	0.0145	0.0003	0.0003	0.0003	0.0003	0.0003	0.0192	0.0003	0.0003	0.0003	0.0003	0.0003	0.0003	0.0003	0.0003	0.0003
AMPD3	0.0003	0.0146	0.0003	0.0003	0.0003	0.0003	0.0003	0.0003	0.0003	0.0003	0.0003	0.0003	0.0003	0.0003	0.0003	0.0003	0.0003
USP47	0.0003	0.0146	0.0003	0.0003	0.0003	0.0003	0.0003	0.0003	0.0003	0.0003	0.0003	0.0003	0.0003	0.0003	0.0156	0.0236	0.0003
ADAMTSL1	0.0003	0.0003	0.0149	0.0003	0.0003	0.0003	0.0003	0.0003	0.0003	0.0003	0.0177	0.0029	0.0003	0.0003	0.0003	0.0003	0.0003
MYO3B	0.0003	0.015	0.0003	0.0003	0.0003	0.0003	0.0003	0.0003	0.0003	0.0003	0.0003	0.0003	0.0003	0.0349	0.0003	0.0003	0.0003
PLCXD1	0.0003	0.0003	0.0003	0.0151	0.0003	0.0003	0.0003	0.0003	0.0003	0.0003	0.0003	0.0003	0.0003	0.0003	0.0003	0.0003	0.0003
SHROOM3	0.0003	0.0003	0.0003	0.0003	0.0152	0.0003	0.0003	0.0003	0.0003	0.0003	0.0003	0.0003	0.0003	0.0077	0.0062	0.0003	0.0157
ABCA8	0.0003	0.0003	0.0003	0.0153	0.0003	0.0003	0.0063	0.0003	0.0003	0.0003	0.0003	0.0003	0.0003	0.0003	0.0003	0.0003	0.0003
PLCG2	0.0003	0.0154	0.0003	0.0003	0.0003	0.0003	0.0003	0.0046	0.0003	0.0003	0.0078	0.0048	0.0003	0.0003	0.0003	0.0061	0.0003
VCPIP1	0.0068	0.009	0.0003	0.0003	0.0003	0.0003	0.0003	0.0003	0.0003	0.0003	0.0003	0.0003	0.0003	0.0003	0.0003	0.0003	0.0003
IL4I1	0.0003	0.0158	0.0003	0.0003	0.0003	0.1366	0.0003	0.0003	0.0003	0.0003	0.0003	0.0003	0.0003	0.0003	0.0003	0.0003	0.038
MED15	0.0003	0.0159	0.0003	0.0003	0.0003	0.0003	0.0003	0.0003	0.0003	0.0003	0.0003	0.0003	0.0003	0.0003	0.0003	0.0003	0.0003
CACNA1E	0.0003	0.016	0.0003	0.0003	0.0003	0.0003	0.0003	0.0003	0.0003	0.0003	0.0003	0.0003	0.0003	0.0003	0.0003	0.0003	0.0003
CCDC168	0.0003	0.0071	0.0003	0.0033	0.0062	0.0034	0.0003	0.0003	0.0003	0.0003	0.0003	0.0021	0.0003	0.0003	0.0003	0.0003	0.0003
ABCB7	0.0003	0.016	0.0003	0.0003	0.0003	0.0003	0.0003	0.0003	0.0003	0.0003	0.0003	0.0003	0.0003	0.0003	0.0274	0.0003	0.0416
SYTL4	0.0162	0.0003	0.0003	0.0003	0.0003	0.0003	0.0003	0.0003	0.0003	0.0003	0.0003	0.0003	0.0003	0.0003	0.0003	0.0003	0.0003
ZC3HC1	0.0003	0.0163	0.0003	0.0003	0.0003	0.0003	0.0003	0.0003	0.0003	0.0003	0.0003	0.0003	0.0003	0.0003	0.0003	0.0003	0.0003
FAM21A	0.0163	0.0003	0.0003	0.0003	0.0003	0.0064	0.0003	0.0003	0.0003	0.0049	0.0003	0.0003	0.0003	0.0003	0.0003	0.0003	0.0003
HEATR1	0.0113	0.0055	0.0003	0.0003	0.0003	0.0003	0.0003	0.0003	0.0003	0.0003	0.0003	0.0003	0.0003	0.0003	0.0003	0.0003	0.0003
TRIM35	0.0003	0.0003	0.0165	0.0003	0.0003	0.0003	0.0383	0.0003	0.0003	0.0003	0.0003	0.0003	0.0003	0.0003	0.0003	0.0003	0.0003
NUP188	0.0166	0.0003	0.0003	0.0003	0.0003	0.0291	0.0003	0.0003	0.0003	0.0003	0.0003	0.0003	0.0003	0.0003	0.0003	0.0003	0.0003
SNTA1	0.0146	0.0003	0.0003	0.0003	0.0023	0.0003	0.0003	0.0003	0.0003	0.0003	0.0003	0.0003	0.0003	0.0003	0.1726	0.0003	0.0003
ATMIN	0.0003	0.0167	0.0003	0.0003	0.0003	0.0003	0.0003	0.0003	0.0003	0.0003	0.0003	0.0003	0.0003	0.0003	0.0003	0.0003	0.0003
EML5	0.0003	0.0167	0.0003	0.0003	0.0003	0.0003	0.0003	0.0003	0.0003	0.0003	0.0003	0.0003	0.0003	0.0003	0.0003	0.0003	0.0003
PCDHB10	0.0003	0.0167	0.0003	0.0003	0.0003	0.0003	0.0003	0.0003	0.0003	0.0003	0.0003	0.0003	0.0003	0.0003	0.0003	0.0003	0.0003
FMNL2	0.0003	0.0003	0.0003	0.006	0.011	0.0202	0.0003	0.0003	0.0003	0.0003	0.0003	0.0003	0.0003	0.0003	0.0034	0.0003	0.0003
DBC1	0.0003	0.0003	0.0003	0.0168	0.0003	0.0003	0.0003	0.0003	0.0003	0.0003	0.0003	0.0003	0.0003	0.0003	0.0003	0.0003	0.0003
EML6	0.0003	0.0168	0.0003	0.0003	0.0003	0.0003	0.0003	0.0003	0.0003	0.0003	0.0003	0.0003	0.0003	0.0003	0.0003	0.0003	0.0003
POLR2A	0.0168	0.0003	0.0003	0.0003	0.0003	0.0003	0.0003	0.0003	0.0003	0.0003	0.0003	0.0003	0.0003	0.0003	0.0003	0.0003	0.0003
TRMT1	0.0003	0.0003	0.0003	0.017	0.0003	0.0003	0.0003	0.0003	0.0003	0.0003	0.0003	0.0003	0.0003	0.0003	0.0003	0.0003	0.0003
FAM21C	0.0171	0.0003	0.0003	0.0003	0.0003	0.0068	0.0003	0.0003	0.0003	0.0052	0.0003	0.0003	0.0003	0.0003	0.0003	0.0003	0.0003
NOTCH3	0.0003	0.0043	0.0003	0.0003	0.0132	0.0003	0.0003	0.003	0.0003	0.0003	0.0003	0.0003	0.0003	0.0003	0.0003	0.0249	0.0003
GALNT5	0.0172	0.0003	0.0003	0.0003	0.0003	0.0003	0.0003	0.0003	0.0003	0.0003	0.0003	0.0003	0.0003	0.0003	0.0003	0.0621	0.0003
FAM21B	0.0173	0.0003	0.0003	0.0003	0.0003	0.0069	0.0003	0.0003	0.0003	0.0052	0.0003	0.0003	0.0003	0.0003	0.0003	0.0003	0.0003
RNF123	0.0003	0.0003	0.0173	0.0003	0.0003	0.0003	0.0067	0.0003	0.0003	0.0003	0.0003	0.0003	0.0003	0.0003	0.034	0.0003	0.0003
SLC12A5	0.0003	0.0175	0.0003	0.0003	0.0003	0.0003	0.0003	0.0003	0.0003	0.0003	0.0003	0.0003	0.0003	0.0003	0.0003	0.0003	0.0003
RGPD3	0.0123	0.0045	0.0003	0.0013	0.0003	0.0006	0.0011	0.0003	0.0003	0.0003	0.0003	0.0003	0.0003	0.0003	0.0031	0.0014	0.0014
COQ10A	0.0003	0.0003	0.0003	0.0175	0.0003	0.0003	0.0003	0.0003	0.0003	0.0003	0.0003	0.0003	0.0003	0.0003	0.032	0.0003	0.0003
PACS2	0.0003	0.0003	0.0003	0.0003	0.0176	0.0003	0.0003	0.0003	0.0003	0.0003	0.0003	0.0003	0.0003	0.0003	0.0003	0.0003	0.0003
PCDHB9	0.0003	0.0176	0.0003	0.0003	0.0003	0.0003	0.0003	0.0003	0.0003	0.0003	0.0003	0.0003	0.0003	0.0003	0.0003	0.0003	0.0003
FBXW5	0.0003	0.0003	0.0176	0.0003	0.0003	0.0003	0.0003	0.0003	0.0003	0.0485	0.0003	0.0003	0.0003	0.0003	0.0003	0.0003	0.0003
SELO	0.0179	0.0003	0.0003	0.0003	0.0003	0.0003	0.0003	0.0003	0.0003	0.0003	0.0003	0.0003	0.0003	0.0003	0.0003	0.0003	0.0003
RGPD4	0.0126	0.0046	0.0003	0.0013	0.0003	0.0003	0.0011	0.0003	0.0003	0.0003	0.0003	0.0003	0.0003	0.0003	0.0032	0.0015	0.0014
CNOT7	0.0003	0.018	0.0003	0.0003	0.0003	0.0003	0.0003	0.0003	0.0003	0.0003	0.0003	0.0003	0.0003	0.0003	0.0003	0.0003	0.0003
FMNL3	0.0003	0.0003	0.0003	0.0065	0.0118	0.0003	0.0003	0.0003	0.0003	0.0003	0.0003	0.0003	0.0003	0.0003	0.0003	0.0003	0.0003
PLEKHH1	0.0003	0.018	0.0003	0.0003	0.0003	0.0003	0.0003	0.0003	0.0003	0.0003	0.0003	0.0003	0.0003	0.0657	0.0003	0.0003	0.0197
EGFLAM	0.0003	0.0181	0.0003	0.0003	0.0003	0.0003	0.0003	0.0003	0.0003	0.0003	0.0003	0.0003	0.0003	0.0003	0.0003	0.0003	0.0003
RGPD1	0.0127	0.0047	0.0003	0.0013	0.0003	0.0006	0.0011	0.0003	0.0003	0.0003	0.0003	0.0003	0.0003	0.0003	0.0032	0.0015	0.0014
RGPD2	0.0127	0.0047	0.0003	0.0013	0.0003	0.0006	0.0011	0.0003	0.0003	0.0003	0.0003	0.0003	0.0003	0.0003	0.0032	0.0015	0.0014
ADAMTSL4	0.0003	0.0003	0.0003	0.0181	0.0003	0.0003	0.0078	0.0003	0.0232	0.0003	0.0352	0.0003	0.0003	0.0003	0.0218	0.0003	0.0003
ACACB	0.0182	0.0003	0.0003	0.0003	0.0003	0.0003	0.0003	0.0003	0.0003	0.0003	0.0003	0.0003	0.0003	0.0003	0.0003	0.0003	0.0003
SMEK1	0.0003	0.0182	0.0003	0.0003	0.0003	0.0003	0.0003	0.0003	0.0003	0.0003	0.0003	0.0003	0.0003	0.0003	0.0003	0.0003	0.0003
ANKRD44	0.0003	0.0183	0.0003	0.0003	0.0003	0.0003	0.0003	0.0003	0.0003	0.0003	0.0003	0.0003	0.0003	0.0003	0.0003	0.0003	0.0003
UBE4A	0.0003	0.0183	0.0003	0.0003	0.0003	0.0227	0.0003	0.0003	0.0003	0.0003	0.0003	0.0003	0.0003	0.0003	0.0219	0.0003	0.0461
BTN3A3	0.0003	0.0003	0.0003	0.0184	0.0003	0.0003	0.0003	0.0072	0.0003	0.0003	0.0003	0.0003	0.0271	0.0365	0.0003	0.0391	0.0003
STRN4	0.0186	0.0003	0.0003	0.0003	0.0003	0.0003	0.0003	0.0003	0.0003	0.0003	0.0003	0.0003	0.0003	0.0003	0.0003	0.0003	0.0003
CHURC1-FNTB	0.0003	0.0187	0.0003	0.0003	0.0003	0.0003	0.0003	0.0003	0.0003	0.0003	0.0003	0.0003	0.0003	0.0003	0.0003	0.0003	0.0003
TAPBPL	0.0187	0.0003	0.0003	0.0003	0.0003	0.0003	0.0003	0.0003	0.0003	0.0003	0.0003	0.0003	0.0003	0.0003	0.0003	0.0003	0.0003
RHCG	0.0003	0.0188	0.0003	0.0003	0.0003	0.0003	0.0003	0.0003	0.0003	0.0003	0.0003	0.0003	0.0003	0.0003	0.0003	0.0003	0.0003
RRP12	0.0161	0.0003	0.003	0.0003	0.0003	0.0101	0.0003	0.0003	0.0003	0.0003	0.0003	0.0003	0.0003	0.0093	0.0046	0.0003	0.0003
CHUK	0.0003	0.0003	0.0138	0.0054	0.0003	0.0003	0.0003	0.0003	0.0003	0.0003	0.0003	0.0003	0.0003	0.0003	0.0003	0.0003	0.0003
CARD14	0.0003	0.0192	0.0003	0.0003	0.0003	0.0003	0.0003	0.0003	0.0003	0.0003	0.0003	0.0003	0.0003	0.0003	0.0003	0.0003	0.0003
GXYLT2	0.0003	0.0003	0.0193	0.0003	0.0003	0.0003	0.0003	0.0131	0.0003	0.0003	0.0274	0.0096	0.0003	0.0313	0.0181	0.039	0.0601
CUEDC1	0.0003	0.0003	0.0194	0.0003	0.0003	0.0003	0.0003	0.0003	0.0003	0.0003	0.0003	0.0003	0.0003	0.0003	0.0003	0.0003	0.0003
ABR	0.0003	0.0195	0.0003	0.0003	0.0003	0.0003	0.0003	0.0003	0.0003	0.0003	0.0003	0.0003	0.0003	0.0003	0.0003	0.0003	0.0003
FNTB	0.0003	0.0196	0.0003	0.0003	0.0003	0.0003	0.0196	0.0003	0.0003	0.0003	0.0003	0.0003	0.0003	0.0003	0.0003	0.0003	0.0003
LOC101060503	0.0197	0.0003	0.0003	0.0003	0.0003	0.0003	0.0003	0.0003	0.0003	0.0003	0.0003	0.0003	0.0003	0.0003	0.0003	0.0003	0.0003
TXNIP	0.0197	0.0003	0.0003	0.0003	0.0003	0.0003	0.0003	0.0003	0.0003	0.0003	0.0003	0.0003	0.0003	0.0003	0.0003	0.0003	0.0003
ALG11	0.0003	0.0003	0.0003	0.0197	0.0003	0.0003	0.0003	0.0003	0.0003	0.0003	0.0003	0.0003	0.0003	0.0003	0.0003	0.0381	0.0003
GIMAP8	0.0003	0.0003	0.0198	0.0003	0.0003	0.0003	0.0003	0.0003	0.0003	0.0003	0.0003	0.0003	0.0003	0.0003	0.0003	0.0003	0.0003
MUC5B	0.0003	0.0198	0.0003	0.0003	0.0003	0.0003	0.0003	0.0003	0.0003	0.0003	0.0003	0.0003	0.0003	0.0003	0.0003	0.0003	0.0003
NAT10	0.0148	0.0003	0.0053	0.0003	0.0003	0.0003	0.0003	0.0003	0.0003	0.0003	0.0003	0.0003	0.0003	0.0003	0.0003	0.0003	0.0003
NPR2	0.0003	0.0003	0.0198	0.0003	0.0003	0.0003	0.0003	0.0003	0.0003	0.0003	0.0269	0.0003	0.0003	0.0003	0.0003	0.0003	0.0003
PRRC2C	0.0199	0.0003	0.0003	0.0003	0.0003	0.0003	0.0003	0.0003	0.0003	0.0003	0.0003	0.0003	0.0003	0.0003	0.0003	0.0003	0.0003
PDPR	0.0003	0.0077	0.0003	0.0003	0.0125	0.0003	0.0003	0.0003	0.0003	0.0003	0.0003	0.0003	0.0003	0.0003	0.0003	0.0003	0.0397
HEATR2	0.0003	0.0003	0.0199	0.0003	0.0003	0.0138	0.006	0.0003	0.0003	0.0003	0.0003	0.0003	0.0003	0.0003	0.0003	0.0003	0.07
EPS8L3	0.0003	0.0003	0.0003	0.0199	0.0003	0.0003	0.0003	0.0003	0.0003	0.0491	0.0003	0.019	0.0003	0.0003	0.2037	0.0003	0.0003
CTSA	0.02	0.0003	0.0003	0.0003	0.0003	0.121	0.0003	0.0003	0.0003	0.0003	0.0003	0.0177	0.0003	0.0986	0.0003	0.2011	0.0003
CYP4X1	0.0003	0.0202	0.0003	0.0003	0.0003	0.0003	0.0003	0.0003	0.0003	0.0003	0.0003	0.0003	0.0003	0.0003	0.0003	0.0003	0.0003
TAP1	0.0202	0.0003	0.0003	0.0003	0.0003	0.0003	0.0003	0.0003	0.0003	0.0003	0.0003	0.0003	0.0003	0.0003	0.0003	0.0003	0.0003
UPF2	0.0118	0.0003	0.0003	0.0087	0.0003	0.0003	0.0003	0.0003	0.0003	0.0003	0.0003	0.0003	0.0003	0.0003	0.0003	0.0003	0.0003
CLPTM1	0.0203	0.0003	0.0003	0.0003	0.0003	0.0003	0.0003	0.0003	0.0003	0.0003	0.0003	0.0003	0.0003	0.0003	0.0003	0.0003	0.0003
NXF1	0.0003	0.0205	0.0003	0.0003	0.0003	0.0003	0.0003	0.0154	0.0003	0.0003	0.0946	0.0003	0.0003	0.0003	0.0003	0.0003	0.0003
MCM10	0.0003	0.0003	0.0206	0.0003	0.0003	0.0177	0.0003	0.0003	0.0003	0.0003	0.0003	0.0003	0.0003	0.0003	0.0003	0.0003	0.0003
BTN3A1	0.0003	0.0003	0.0003	0.0206	0.0003	0.0003	0.0003	0.008	0.0003	0.0003	0.0003	0.0003	0.0303	0.0408	0.0003	0.0438	0.0003
EIF2D	0.0003	0.0003	0.0003	0.0003	0.0207	0.0003	0.0003	0.0003	0.0003	0.0003	0.0003	0.0003	0.0003	0.0003	0.1011	0.0003	0.0624
ARHGEF37	0.0003	0.0003	0.0208	0.0003	0.0003	0.0003	0.008	0.0003	0.0003	0.0003	0.0003	0.0003	0.0003	0.0003	0.0003	0.0003	0.0003
XPO5	0.0212	0.0003	0.0003	0.0003	0.0003	0.0003	0.0003	0.0003	0.0003	0.0003	0.0003	0.0003	0.0003	0.0003	0.0218	0.0003	0.0132
PLCD4	0.0003	0.0003	0.0212	0.0003	0.0003	0.0003	0.0003	0.0003	0.0003	0.0003	0.0003	0.0003	0.0003	0.0003	0.0332	0.0211	0.0003
VPS37A	0.0003	0.0003	0.0003	0.0003	0.0214	0.0003	0.0003	0.0003	0.0003	0.0003	0.0003	0.0003	0.0003	0.0003	0.0003	0.0003	0.0003
SYDE1	0.0003	0.0003	0.0119	0.0099	0.0003	0.0003	0.0003	0.0003	0.0003	0.0003	0.0003	0.0003	0.0003	0.0003	0.0003	0.0003	0.2178
GTF3C1	0.0171	0.0048	0.0003	0.0003	0.0003	0.0003	0.0003	0.0003	0.0003	0.0003	0.0003	0.0003	0.0003	0.0003	0.0003	0.0003	0.0003
STON2	0.0003	0.0003	0.0003	0.0217	0.0003	0.0003	0.0003	0.041	0.0003	0.0003	0.0003	0.0003	0.0003	0.0003	0.0296	0.0003	0.0003
RPS6KA5	0.0003	0.0219	0.0003	0.0003	0.0003	0.0003	0.0003	0.0003	0.0003	0.0003	0.0003	0.0003	0.0003	0.0003	0.0003	0.0003	0.0003
SEC11C	0.0003	0.0003	0.0003	0.0221	0.0003	0.1785	0.0003	0.0003	0.0003	0.0003	0.0003	0.1451	0.1865	1.0297	0.0003	0.0003	0.0003
FAM45A	0.0003	0.0003	0.0222	0.0003	0.0003	0.391	0.0003	0.0003	0.0003	0.0003	0.0003	0.0003	0.0003	0.0003	0.0003	0.0003	0.0003
KIF13A	0.0003	0.0003	0.0225	0.0003	0.0003	0.0003	0.0003	0.0003	0.0003	0.0003	0.0003	0.0003	0.0003	0.0003	0.0003	0.0003	0.0003
CYP3A7-CYP3AP1	0.0228	0.0003	0.0003	0.0003	0.0003	0.0003	0.0003	0.0003	0.0003	0.0003	0.0003	0.0003	0.0003	0.0003	0.0003	0.0003	0.0003
MTMR9	0.0003	0.0003	0.0003	0.0003	0.0229	0.0003	0.0003	0.0003	0.0003	0.0003	0.0003	0.0003	0.0003	0.0003	0.0003	0.0003	0.0003
ACSF2	0.0003	0.0155	0.0079	0.0003	0.0003	0.0003	0.0003	0.0003	0.0003	0.0003	0.0003	0.0003	0.0003	0.0003	0.0003	0.0003	0.0003
DNAH5	0.0231	0.0003	0.0003	0.0003	0.0003	0.0003	0.0003	0.0003	0.0003	0.0003	0.0003	0.0003	0.0003	0.0003	0.0003	0.0003	0.0003
GBP7	0.0003	0.0232	0.0003	0.0003	0.0003	0.0003	0.0003	0.0003	0.0003	0.0003	0.0003	0.0003	0.0003	0.0003	0.0003	0.0003	0.0003
SUPT6H	0.0232	0.0003	0.0003	0.0003	0.0003	0.0133	0.0003	0.0003	0.0003	0.0003	0.0003	0.0003	0.0003	0.0003	0.0156	0.0003	0.0207
COG5	0.0153	0.0083	0.0003	0.0003	0.0003	0.0627	0.0003	0.0003	0.0003	0.0003	0.0003	0.0003	0.0003	0.0463	0.0763	0.0003	0.1316
TAF9	0.0003	0.0234	0.0003	0.0003	0.0003	0.0003	0.01	0.0003	0.0003	0.0167	0.0003	0.0214	0.0003	0.0003	0.0003	0.0003	0.0509
SYT17	0.0003	0.0235	0.0003	0.0003	0.0003	0.0003	0.0003	0.0003	0.0003	0.0003	0.0003	0.0003	0.0003	0.0003	0.0003	0.0003	0.0003
U2SURP	0.0236	0.0003	0.0003	0.0003	0.0003	0.0003	0.0003	0.0003	0.0003	0.0003	0.0003	0.0003	0.0003	0.0003	0.0003	0.0162	0.105
CYP3A4	0.0237	0.0003	0.0003	0.0003	0.0003	0.0003	0.0003	0.0003	0.0003	0.0003	0.0003	0.0003	0.0003	0.0003	0.0003	0.0003	0.0003
CYP3A7	0.0237	0.0003	0.0003	0.0003	0.0003	0.0003	0.0003	0.0003	0.0003	0.0003	0.0003	0.0003	0.0003	0.0003	0.0003	0.0003	0.0003
ZFHX3	0.0003	0.0003	0.0237	0.0003	0.0003	0.0003	0.0003	0.0003	0.0003	0.0003	0.0003	0.0003	0.0003	0.0003	0.0003	0.0003	0.0003
ZFP91	0.0003	0.0003	0.0237	0.0003	0.0003	0.0003	0.0003	0.0003	0.0003	0.0003	0.0003	0.0003	0.0003	0.0003	0.0003	0.0003	0.0308
STAT5A	0.0003	0.0003	0.0238	0.0003	0.0003	0.0003	0.0003	0.0003	0.0003	0.0003	0.0003	0.0003	0.0003	0.0003	0.0003	0.0003	0.0003
COG2	0.0003	0.0238	0.0003	0.0003	0.0003	0.0176	0.0003	0.0003	0.0003	0.0003	0.0003	0.0003	0.0003	0.0003	0.0003	0.0136	0.0003
WDR7	0.0003	0.01	0.0003	0.0003	0.0143	0.0003	0.0003	0.0003	0.0003	0.0003	0.0003	0.0003	0.0003	0.0003	0.0077	0.0003	0.0003
IDUA	0.0003	0.0003	0.024	0.0003	0.0003	0.0003	0.0003	0.0003	0.0003	0.0003	0.0003	0.1045	0.0003	0.0483	0.0003	0.1034	0.0751
MAN2A2	0.0003	0.0241	0.0003	0.0003	0.0003	0.0003	0.0003	0.0003	0.0003	0.0003	0.0003	0.0003	0.0003	0.0003	0.0003	0.0003	0.0003
RPS6KA4	0.0003	0.0241	0.0003	0.0003	0.0003	0.0003	0.0003	0.0003	0.0003	0.0003	0.0003	0.0003	0.0003	0.0003	0.0003	0.0003	0.0003
PKP4	0.0111	0.0052	0.0085	0.0003	0.0003	0.0003	0.0003	0.0003	0.0003	0.0003	0.0003	0.0003	0.0003	0.0003	0.0003	0.0003	0.0003
OR1L6	0.0003	0.0243	0.0003	0.0003	0.0003	0.0003	0.0003	0.0003	0.0003	0.0003	0.0003	0.0003	0.0003	0.0003	0.0003	0.0003	0.0003
HEATR5A	0.0003	0.0003	0.0243	0.0003	0.0003	0.0003	0.0182	0.0003	0.0003	0.0003	0.0003	0.0003	0.0003	0.1019	0.0003	0.0832	0.1381
ALPK3	0.0003	0.0244	0.0003	0.0003	0.0003	0.0003	0.0003	0.0003	0.0003	0.0003	0.0003	0.0003	0.0003	0.0003	0.0003	0.0003	0.0003
ANTXR2	0.0003	0.0003	0.0245	0.0003	0.0003	0.0003	0.0123	0.0003	0.0003	0.0003	0.0003	0.0003	0.0003	0.0003	0.0003	0.0003	0.0003
CTAGE8	0.0246	0.0003	0.0003	0.0003	0.0003	0.0003	0.0003	0.0003	0.0003	0.0003	0.0003	0.0003	0.0003	0.0003	0.0003	0.0003	0.0003
XRN1	0.0143	0.0003	0.0106	0.0003	0.0003	0.0186	0.0003	0.0003	0.0003	0.0003	0.0003	0.0098	0.0003	0.0003	0.0097	0.0161	0.0152
TAF9B	0.0003	0.0247	0.0003	0.0003	0.0003	0.0003	0.0106	0.0003	0.0003	0.0177	0.0003	0.0226	0.0003	0.0003	0.0003	0.0003	0.0539
CTAGE4	0.0251	0.0003	0.0003	0.0003	0.0003	0.0003	0.0003	0.0003	0.0003	0.0003	0.0003	0.0003	0.0003	0.0003	0.0003	0.0003	0.0003
CTAGE9	0.0251	0.0003	0.0003	0.0003	0.0003	0.0003	0.0003	0.0003	0.0003	0.0003	0.0003	0.0003	0.0003	0.0003	0.0003	0.0003	0.0003
PPP1R10	0.0253	0.0003	0.0003	0.0003	0.0003	0.0003	0.0003	0.0003	0.0003	0.0003	0.0003	0.0003	0.0003	0.0003	0.0003	0.0003	0.0003
DIP2B	0.0254	0.0003	0.0003	0.0003	0.0003	0.0003	0.0003	0.0003	0.0003	0.0003	0.0003	0.0003	0.0003	0.0003	0.0003	0.0003	0.0003
TTC37	0.0135	0.0122	0.0003	0.0003	0.0003	0.0003	0.0003	0.0052	0.0003	0.0003	0.0003	0.0003	0.0003	0.0003	0.0003	0.0003	0.0003
EIF2B2	0.0003	0.0254	0.0003	0.0003	0.0003	0.0003	0.0003	0.0003	0.0003	0.0003	0.0003	0.0003	0.0003	0.0003	0.0003	0.0003	0.5317
BTN3A2	0.0003	0.0003	0.0003	0.0256	0.0003	0.0003	0.0003	0.01	0.0003	0.0003	0.0003	0.0003	0.0377	0.0507	0.0003	0.0544	0.0003
TEX10	0.0003	0.0096	0.0164	0.0003	0.0003	0.0003	0.0003	0.0003	0.0003	0.0003	0.0003	0.0003	0.0003	0.0003	0.0003	0.0003	0.0388
MAPK8	0.0003	0.0003	0.0259	0.0003	0.0003	0.0003	0.0003	0.0003	0.0003	0.0003	0.0003	0.0003	0.0003	0.0003	0.0003	0.0003	0.0003
ZMPSTE24	0.0003	0.0003	0.0259	0.0003	0.0003	0.0003	0.0003	0.0003	0.0003	0.0003	0.0003	0.0003	0.0003	0.0003	0.0003	0.0003	0.0003
MAEA	0.0003	0.0003	0.0259	0.0003	0.0003	0.0215	0.0003	0.0003	0.0003	0.0003	0.0003	0.0003	0.0003	0.0003	0.0003	0.0003	0.0003
OR1L4	0.0003	0.0261	0.0003	0.0003	0.0003	0.0003	0.0003	0.0003	0.0003	0.0003	0.0003	0.0003	0.0003	0.0003	0.0003	0.0003	0.0003
PCDHA7	0.0003	0.0262	0.0003	0.0003	0.0003	0.0003	0.0003	0.0003	0.0003	0.0003	0.0003	0.0003	0.0003	0.0003	0.0003	0.0003	0.0003
RRM1	0.0262	0.0003	0.0003	0.0003	0.0003	0.0003	0.0003	0.0003	0.0003	0.0003	0.0003	0.0003	0.0003	0.0003	0.0003	0.0003	0.0003
MYO9B	0.0003	0.0003	0.0046	0.0003	0.0219	0.0003	0.0003	0.0003	0.0003	0.003	0.0003	0.0003	0.0003	0.0003	0.0003	0.0182	0.0173
CD5L	0.0003	0.0264	0.0003	0.0003	0.0003	0.0003	0.0003	0.0003	0.0003	0.0003	0.0003	0.0003	0.0003	0.1541	0.0003	0.0003	0.0003
SLC27A3	0.0003	0.0003	0.0003	0.0003	0.0265	0.0003	0.0003	0.0003	0.0003	0.0003	0.0003	0.0003	0.0003	0.0003	0.0003	0.0003	0.0003
ZYG11B	0.0003	0.0003	0.0179	0.0003	0.0089	0.0003	0.0003	0.0003	0.0003	0.0003	0.0003	0.0003	0.0003	0.0003	0.0003	0.0003	0.0003
SCYL1	0.0265	0.0003	0.0003	0.0003	0.0003	0.0547	0.0003	0.0003	0.0003	0.0003	0.0003	0.0003	0.0003	0.0636	0.1466	0.0792	0.1423
TAOK3	0.0003	0.0266	0.0003	0.0003	0.0003	0.0003	0.0003	0.0003	0.0003	0.0003	0.0003	0.0003	0.0003	0.0127	0.0003	0.0003	0.0003
MUC20	0.0003	0.0267	0.0003	0.0003	0.0003	0.0003	0.0003	0.0003	0.0003	0.0003	0.0003	0.0003	0.0003	0.0003	0.0003	0.0003	0.0003
SBF1	0.0074	0.0003	0.0196	0.0003	0.0003	0.0003	0.0003	0.0003	0.0003	0.0003	0.0003	0.0003	0.0003	0.0003	0.0024	0.0003	0.0003
SIAE	0.0267	0.0003	0.0003	0.0003	0.0003	0.0003	0.0003	0.0003	0.0003	0.0003	0.0003	0.0003	0.0003	0.046	0.0003	0.0003	0.0003
KIF2A	0.0003	0.0003	0.0267	0.0003	0.0003	0.0444	0.0268	0.0003	0.0003	0.0003	0.0003	0.1112	0.0003	0.0003	0.0243	0.0622	0.0861
AAK1	0.0268	0.0003	0.0003	0.0003	0.0003	0.0188	0.0003	0.0003	0.0003	0.0003	0.0003	0.0003	0.0003	0.0003	0.0003	0.0003	0.0003
ABCB10	0.0003	0.0003	0.0136	0.0003	0.0136	0.0003	0.0003	0.0003	0.0003	0.0003	0.0003	0.0003	0.0003	0.0003	0.0003	0.0003	0.0003
DDX47	0.0003	0.027	0.0003	0.0003	0.0003	0.0003	0.0003	0.0003	0.0003	0.0003	0.0003	0.0003	0.0003	0.0003	0.0003	0.0003	0.0003
MRPL46	0.0003	0.027	0.0003	0.0003	0.0003	0.0003	0.0003	0.0003	0.0003	0.0003	0.0003	0.0003	0.0003	0.0003	0.0003	0.0003	0.0003
METTL14	0.0003	0.0271	0.0003	0.0003	0.0003	0.0003	0.0003	0.0003	0.0003	0.0003	0.0003	0.0003	0.0003	0.0003	0.0003	0.0003	0.0003
ADAMTSL3	0.0003	0.0003	0.0003	0.0272	0.0003	0.0003	0.0003	0.0139	0.0003	0.0003	0.0003	0.008	0.0003	0.0003	0.0003	0.0003	0.0003
TCP11L1	0.0003	0.0003	0.0274	0.0003	0.0003	0.0003	0.0003	0.0003	0.0003	0.0003	0.0003	0.0003	0.0003	0.0003	0.0003	0.0003	0.0003
TRIM5	0.0003	0.0003	0.0003	0.0003	0.0274	0.0003	0.0003	0.0003	0.0003	0.0003	0.0003	0.0003	0.0003	0.0003	0.0003	0.0003	0.0003
AKAP11	0.0003	0.0003	0.0275	0.0003	0.0003	0.0003	0.0003	0.0003	0.0003	0.0003	0.0003	0.0003	0.0003	0.0003	0.0003	0.0003	0.0003
EXOG	0.0003	0.0003	0.0003	0.0276	0.0003	0.0417	0.0003	0.0247	0.0003	0.0003	0.0389	0.0003	0.0003	0.0003	0.0653	0.0003	0.1728
CPSF2	0.0277	0.0003	0.0003	0.0003	0.0003	0.0704	0.0003	0.0003	0.0003	0.0003	0.0003	0.0003	0.0003	0.0003	0.0003	0.0003	0.0003
CPD	0.0278	0.0003	0.0003	0.0003	0.0003	0.0003	0.0003	0.0003	0.0003	0.0003	0.0003	0.0003	0.0003	0.0003	0.0003	0.0003	0.0003
STAG2	0.0278	0.0003	0.0003	0.0003	0.0003	0.0003	0.0003	0.0003	0.0003	0.0003	0.0003	0.0003	0.0003	0.0003	0.0003	0.0003	0.0003
POFUT1	0.0003	0.0003	0.0278	0.0003	0.0003	0.0003	0.0003	0.0003	0.0003	0.0003	0.0003	0.0003	0.0003	0.2008	0.0003	0.0003	0.0003
LEPREL2	0.0003	0.0279	0.0003	0.0003	0.0003	1.2286	0.0003	0.0003	0.4255	0.0003	0.1469	0.1702	1.2592	0.7281	0.0953	1.107	0.7027
ADAMTS10	0.0003	0.0003	0.028	0.0003	0.0003	0.0003	0.0003	0.0003	0.0003	0.0003	0.0003	0.0003	0.0003	0.0003	0.0003	0.0003	0.0003
TMEM214	0.028	0.0003	0.0003	0.0003	0.0003	0.0003	0.0003	0.0003	0.0003	0.0003	0.0003	0.0003	0.0003	0.0003	0.0003	0.0003	0.0003
ARFGEF1	0.0251	0.0033	0.0003	0.0003	0.0003	0.0003	0.0003	0.0003	0.0003	0.0003	0.0003	0.0003	0.0003	0.0003	0.0003	0.0003	0.0003
OR1L1	0.0003	0.0281	0.0003	0.0003	0.0003	0.0003	0.0003	0.0003	0.0003	0.0003	0.0003	0.0003	0.0003	0.0003	0.0003	0.0003	0.0003
PICK1	0.0003	0.0003	0.0281	0.0003	0.0003	0.0003	0.0003	0.0003	0.0003	0.0003	0.0003	0.0003	0.0003	0.0003	0.0003	0.0003	0.0003
DNMBP	0.0003	0.0003	0.0281	0.0003	0.0003	0.0003	0.0003	0.0003	0.0003	0.0003	0.0003	0.0003	0.0003	0.0003	0.0003	0.0003	0.0538
BHMT2	0.0003	0.0003	0.0003	0.0003	0.0282	0.0003	0.0003	0.0003	0.0003	0.0003	0.0003	0.0003	0.0003	0.0003	0.0003	0.0003	0.0003
IWS1	0.0003	0.0282	0.0003	0.0003	0.0003	0.0003	0.0003	0.0003	0.0003	0.0003	0.0003	0.0003	0.0003	0.0003	0.0003	0.0003	0.0003
MSLN	0.0284	0.0003	0.0003	0.0003	0.0003	0.0003	0.0003	0.0003	0.0003	0.0003	0.0003	0.0003	0.0003	0.0003	0.0003	0.0003	0.0003
RBM26	0.0285	0.0003	0.0003	0.0003	0.0003	0.0003	0.0003	0.0003	0.0003	0.0003	0.0003	0.0003	0.0003	0.0003	0.0003	0.0003	0.0003
PGLYRP1	0.0286	0.0003	0.0003	0.0003	0.0003	0.0003	0.0003	0.0003	0.0003	0.0003	0.0003	0.0003	0.0003	0.0003	0.0003	0.0003	0.0003
APBB2	0.0003	0.0003	0.0287	0.0003	0.0003	0.0003	0.0003	0.0003	0.0003	0.0003	0.0003	0.0003	0.0003	0.0003	0.0003	0.0003	0.0003
MAN1A2	0.0287	0.0003	0.0003	0.0003	0.0003	0.0003	0.0003	0.0003	0.0003	0.0003	0.0003	0.0003	0.0003	0.0003	0.0003	0.0003	0.0003
KDM1A	0.0003	0.0288	0.0003	0.0003	0.0003	0.0003	0.0003	0.0003	0.0003	0.0003	0.0003	0.0003	0.0003	0.0003	0.0003	0.0003	0.0003
THOC1	0.0003	0.0288	0.0003	0.0003	0.0003	0.0003	0.0003	0.0003	0.0003	0.0003	0.0003	0.0003	0.0003	0.0003	0.0003	0.0003	0.0003
SSBP4	0.0003	0.0289	0.0003	0.0003	0.0003	0.0003	0.0003	0.0003	0.0003	0.0003	0.0003	0.0003	0.0003	0.0003	0.0003	0.0003	0.0003
COMMD7	0.0003	0.0292	0.0003	0.0003	0.0003	0.0003	0.0003	0.0003	0.0003	0.0003	0.0003	0.0003	0.0003	0.0003	0.0003	0.0003	0.0003
FIP1L1	0.0003	0.0003	0.0293	0.0003	0.0003	0.0003	0.0003	0.0003	0.0003	0.0003	0.0003	0.0003	0.0003	0.0003	0.0003	0.0003	0.0003
GLMN	0.0293	0.0003	0.0003	0.0003	0.0003	0.0003	0.0003	0.0003	0.0003	0.0003	0.0003	0.0003	0.0003	0.0003	0.0003	0.0003	0.0003
BCLAF1	0.0003	0.0003	0.0003	0.0293	0.0003	0.0003	0.0233	0.0352	0.0243	0.0241	0.1999	0.0003	0.0003	0.0003	0.0375	0.0003	0.0908
VPS53	0.0295	0.0003	0.0003	0.0003	0.0003	0.0003	0.0003	0.0003	0.0003	0.0003	0.0003	0.0003	0.0003	0.0003	0.0003	0.0003	0.0003
CHORDC1	0.0003	0.0297	0.0003	0.0003	0.0003	0.0003	0.0003	0.0003	0.0003	0.0003	0.0003	0.0003	0.0003	0.0003	0.0003	0.0003	0.0003
SSBP2	0.0003	0.0297	0.0003	0.0003	0.0003	0.0003	0.0003	0.0003	0.0003	0.0003	0.0003	0.0003	0.0003	0.0003	0.0003	0.0003	0.0003
SSBP3	0.0003	0.0297	0.0003	0.0003	0.0003	0.0003	0.0003	0.0003	0.0003	0.0003	0.0003	0.0003	0.0003	0.0003	0.0003	0.0003	0.0003
PCDH11X	0.0209	0.0094	0.0003	0.0003	0.0003	0.0003	0.0003	0.0003	0.0003	0.0003	0.0003	0.0003	0.0003	0.0003	0.0003	0.0003	0.0003
DCP1A	0.0003	0.0003	0.0301	0.0003	0.0003	0.0003	0.0003	0.0003	0.0003	0.0003	0.0003	0.0003	0.0003	0.0003	0.0003	0.0003	0.0003
N6AMT1	0.0003	0.0301	0.0003	0.0003	0.0003	0.0003	0.0003	0.0003	0.0003	0.0003	0.0003	0.0003	0.0003	0.0003	0.0003	0.0003	0.0003
THTPA	0.0003	0.0003	0.0301	0.0003	0.0003	0.109	0.0003	0.0003	0.0003	0.0003	0.0003	0.0003	0.0003	0.0003	0.0003	0.0003	0.0003
SMARCD3	0.0003	0.0302	0.0003	0.0003	0.0003	0.0003	0.0003	0.0003	0.0003	0.0003	0.0003	0.0003	0.0003	0.0003	0.0003	0.0003	0.0003
FGF7	0.0003	0.0003	0.0303	0.0003	0.0003	0.0003	0.0003	0.0003	0.0003	0.0003	0.0003	0.0003	0.0003	0.0003	0.0003	0.0003	0.0003
MOB3B	0.0003	0.0003	0.0303	0.0003	0.0003	0.0003	0.0003	0.0003	0.0003	0.0003	0.0003	0.0003	0.0003	0.0003	0.0003	0.0003	0.0003
SMARCD1	0.0003	0.0303	0.0003	0.0003	0.0003	0.0003	0.0003	0.0003	0.0003	0.0003	0.0003	0.0003	0.0003	0.0003	0.0003	0.0003	0.0003
INPP1	0.0003	0.0303	0.0003	0.0003	0.0003	0.1064	0.0003	0.0003	0.0003	0.0003	0.0003	0.0003	0.0003	0.0003	1.6813	0.0874	0.0003
THAP11	0.0003	0.0304	0.0003	0.0003	0.0003	0.0003	0.0003	0.0003	0.0003	0.0003	0.0003	0.0003	0.0003	0.0003	0.0003	0.0003	0.0003
FBN3	0.0003	0.0003	0.0003	0.0003	0.0306	0.0003	0.0003	0.0003	0.0003	0.0003	0.0003	0.0031	0.0003	0.0003	0.0003	0.0003	0.0003
PTDSS1	0.0003	0.0306	0.0003	0.0003	0.0003	0.104	0.0003	0.0003	0.0003	0.0003	0.0003	0.0003	0.0003	0.0003	0.0003	0.0003	0.0759
VIT	0.0003	0.0003	0.0122	0.0003	0.0188	0.0242	0.0003	0.4905	0.0673	0.2611	0.0588	0.0003	0.0003	0.0003	0.0117	0.0003	0.0003
SCAF8	0.0003	0.0071	0.024	0.0003	0.0003	0.0003	0.0003	0.0003	0.0003	0.0003	0.0003	0.0003	0.0003	0.0003	0.0047	0.006	0.0172
MRPS31	0.0003	0.0003	0.0308	0.0003	0.0003	0.0003	0.0003	0.0003	0.0003	0.0003	0.0003	0.0003	0.0003	0.0003	0.0487	0.048	0.0003
KIAA1614	0.0003	0.0309	0.0003	0.0003	0.0003	0.0003	0.0003	0.0003	0.0003	0.0003	0.0003	0.033	0.0003	0.0003	0.0003	0.0003	0.0003
PI4K2A	0.0003	0.0309	0.0003	0.0003	0.0003	0.0519	0.0003	0.0003	0.0003	0.0355	0.0003	0.0003	0.0003	0.0003	0.0166	0.0394	0.0003
PTGES3L-AARSD1	0.0309	0.0003	0.0003	0.0003	0.0003	0.0003	0.0003	0.0003	0.0003	0.0003	0.0003	0.0003	0.0003	0.0003	0.0352	0.0003	0.1144
WDR11	0.031	0.0003	0.0003	0.0003	0.0003	0.0003	0.0003	0.0003	0.0003	0.0003	0.0003	0.0003	0.0003	0.0003	0.0003	0.0552	0.0946
BICD2	0.0312	0.0003	0.0003	0.0003	0.0003	0.0003	0.0003	0.0003	0.0003	0.0003	0.0003	0.0003	0.0003	0.0003	0.0003	0.0003	0.0003
PCDH11Y	0.0218	0.0098	0.0003	0.0003	0.0003	0.0003	0.0003	0.0003	0.0003	0.0003	0.0003	0.0003	0.0003	0.0003	0.0003	0.0003	0.0003
RPRD2	0.0313	0.0003	0.0003	0.0003	0.0003	0.0003	0.0003	0.0003	0.0003	0.0003	0.0003	0.0003	0.0003	0.0003	0.0003	0.0003	0.0003
FOXRED1	0.0003	0.0003	0.0314	0.0003	0.0003	0.0003	0.0343	0.0003	0.0003	0.0003	0.0003	0.0003	0.0003	0.0003	0.0458	0.0336	0.0003
CYTH1	0.0003	0.0003	0.0314	0.0003	0.0003	0.0348	0.0003	0.0003	0.0003	0.0229	0.0003	0.0003	0.0003	0.0003	0.0288	0.0281	0.0003
XPOT	0.0314	0.0003	0.0003	0.0003	0.0003	0.0117	0.0003	0.0003	0.0003	0.0003	0.0003	0.0003	0.0003	0.2707	0.0003	0.4528	0.1146
ALPL	0.0003	0.0003	0.0003	0.0314	0.0003	0.0003	0.0003	0.0003	0.0003	0.0003	0.0003	0.0003	0.0003	0.3301	0.0291	2.8296	0.1069
GHDC	0.0315	0.0003	0.0003	0.0003	0.0003	0.0003	0.0338	0.0003	0.0003	0.0003	0.0003	0.0003	0.0003	0.0003	0.0465	0.0003	0.0003
CNTRL	0.0003	0.0003	0.0316	0.0003	0.0003	0.0003	0.0003	0.0003	0.0003	0.0003	0.0003	0.0003	0.0003	0.0003	0.0003	0.0003	0.0003
RABGGTB	0.0003	0.0317	0.0003	0.0003	0.0003	0.0003	0.0003	0.0003	0.0003	0.0003	0.0003	0.0003	0.0003	0.0003	0.0003	0.0003	0.0003
B4GALT7	0.0003	0.0318	0.0003	0.0003	0.0003	0.0003	0.0003	0.0003	0.0003	0.0003	0.0003	0.0003	0.0003	0.0003	0.0003	0.0003	0.0003
JAK1	0.0003	0.0003	0.032	0.0003	0.0003	0.0003	0.0003	0.0003	0.0003	0.0003	0.0003	0.0003	0.0003	0.0003	0.0003	0.0003	0.0003
SART1	0.0322	0.0003	0.0003	0.0003	0.0003	0.0003	0.0312	0.0003	0.0003	0.0003	0.0003	0.0003	0.0003	0.0003	0.0003	0.0003	0.0003
ACSS1	0.0325	0.0003	0.0003	0.0003	0.0003	0.0003	0.0003	0.0003	0.0003	0.0003	0.0003	0.0003	0.0003	0.0003	0.0003	0.0003	0.0003
RAPH1	0.0325	0.0003	0.0003	0.0003	0.0003	0.0003	0.0003	0.0003	0.0003	0.0003	0.0003	0.0003	0.0003	0.0003	0.0003	0.0003	0.0003
VANGL2	0.0003	0.0326	0.0003	0.0003	0.0003	0.0003	0.0003	0.0003	0.0003	0.0003	0.0003	0.0003	0.0003	0.0003	0.0003	0.0003	0.0003
RAD21L1	0.0003	0.0189	0.0003	0.014	0.0003	0.0353	0.0123	0.0147	0.0003	0.0003	0.0003	0.0122	0.0003	0.0003	0.0003	0.0245	0.0003
CYTH2	0.0003	0.0003	0.033	0.0003	0.0003	0.0366	0.0003	0.0003	0.0003	0.024	0.0003	0.0003	0.0003	0.0003	0.0302	0.0295	0.0003
CYTH3	0.0003	0.0003	0.033	0.0003	0.0003	0.0366	0.0003	0.0003	0.0003	0.024	0.0003	0.0003	0.0003	0.0003	0.0302	0.0295	0.0003
MYO1G	0.0219	0.0003	0.0114	0.0003	0.0003	0.0617	0.0003	0.0003	0.0003	0.0336	0.0003	0.0003	0.0003	0.0794	0.0003	0.1082	0.0876
CRBN	0.0003	0.0003	0.0331	0.0003	0.0003	0.0003	0.0003	0.0003	0.0003	0.0003	0.0003	0.0003	0.0003	0.0003	0.0003	0.0003	0.0003
MAD1L1	0.0331	0.0003	0.0003	0.0003	0.0003	0.0003	0.0003	0.0003	0.0003	0.0003	0.0003	0.0003	0.0003	0.0003	0.0003	0.0003	0.0003
RBM23	0.0003	0.0003	0.0331	0.0003	0.0003	0.0003	0.0003	0.0003	0.0284	0.0428	0.0003	0.0003	0.0003	0.0614	0.0456	0.0776	0.0003
NOC2L	0.0003	0.0332	0.0003	0.0003	0.0003	0.0003	0.0003	0.0003	0.0003	0.0003	0.0003	0.0003	0.0003	0.0003	0.0003	0.0003	0.0003
NSMAF	0.0003	0.0003	0.0199	0.0003	0.0136	0.0003	0.0003	0.0003	0.0003	0.0003	0.0003	0.0003	0.0003	0.0003	0.0003	0.0003	0.0003
PDGFD	0.0003	0.0332	0.0003	0.0003	0.0003	0.0003	0.0003	0.0003	0.0003	0.0003	0.0003	0.0003	0.0003	0.0003	0.0003	0.0003	0.0003
ANKRD11	0.0333	0.0003	0.0003	0.0003	0.0003	0.0003	0.0003	0.0003	0.0003	0.0003	0.0003	0.0003	0.0003	0.0003	0.0003	0.0003	0.0003
NOB1	0.0333	0.0003	0.0003	0.0003	0.0003	0.0003	0.0003	0.0003	0.0003	0.0003	0.0003	0.0003	0.0003	0.0003	0.0003	0.0003	0.0003
SMAD1	0.0003	0.0333	0.0003	0.0003	0.0003	0.0003	0.0003	0.0003	0.0003	0.0003	0.0003	0.0003	0.0003	0.0003	0.0003	0.0003	0.0003
SMAD5	0.0003	0.0333	0.0003	0.0003	0.0003	0.0003	0.0003	0.0003	0.0003	0.0003	0.0003	0.0003	0.0003	0.0003	0.0003	0.0003	0.0003
CKAP2L	0.0003	0.0003	0.0334	0.0003	0.0003	0.0003	0.0003	0.0003	0.0003	0.0003	0.0003	0.0003	0.0003	0.0003	0.0003	0.0003	0.0003
PLCH1	0.0003	0.0334	0.0003	0.0003	0.0003	0.0003	0.0003	0.0003	0.0003	0.0003	0.0003	0.0003	0.0003	0.0003	0.0003	0.0003	0.0003
ANKS1A	0.0003	0.0003	0.0223	0.0118	0.0003	0.0003	0.0003	0.0003	0.0003	0.0003	0.0003	0.0003	0.0003	0.0003	0.0003	0.0003	0.0003
ASMTL	0.0003	0.0003	0.0339	0.0003	0.0003	0.0003	0.0003	0.0003	0.0003	0.0003	0.0003	0.0003	0.0003	0.0003	0.0003	0.0003	0.0003
SMOC1	0.0003	0.0003	0.034	0.0003	0.0003	0.0003	0.0003	0.0003	0.0003	0.0003	0.0003	0.0003	0.0003	0.0003	0.0003	0.0003	0.0003
ATG4B	0.0003	0.0342	0.0003	0.0003	0.0003	0.0003	0.0003	0.0003	0.0003	0.0003	0.0003	0.0003	0.0003	0.0003	0.0003	0.0003	0.0003
BTNL10	0.0003	0.0003	0.0003	0.0342	0.0003	0.0003	0.0003	0.0003	0.0003	0.0003	0.0003	0.0003	0.0003	0.0003	0.0003	0.0003	0.0003
ATP7A	0.0343	0.0003	0.0003	0.0003	0.0003	0.0003	0.0003	0.0003	0.0003	0.0003	0.0003	0.0003	0.0003	0.0003	0.0003	0.0003	0.0003
CCDC94	0.0003	0.0003	0.0003	0.0343	0.0003	0.0003	0.0003	0.0003	0.0003	0.0003	0.0003	0.0003	0.0003	0.0003	0.0003	0.0003	0.0003
CTAGE15	0.0344	0.0003	0.0003	0.0003	0.0003	0.0003	0.0003	0.0003	0.0003	0.0003	0.0003	0.0003	0.0003	0.0003	0.0003	0.0003	0.0003
CTAGE6	0.0344	0.0003	0.0003	0.0003	0.0003	0.0003	0.0003	0.0003	0.0003	0.0003	0.0003	0.0003	0.0003	0.0003	0.0003	0.0003	0.0003
CADM1	0.0003	0.0003	0.0344	0.0003	0.0003	0.0003	0.086	0.0366	0.0003	0.0003	0.0003	0.0003	0.0003	0.0003	0.0003	0.0003	0.0003
GTF3C3	0.0251	0.0098	0.0003	0.0003	0.0003	0.0003	0.0003	0.0003	0.0003	0.0003	0.0003	0.0003	0.0003	0.0003	0.0003	0.0003	0.0003
STRN3	0.0003	0.0347	0.0003	0.0003	0.0003	0.0003	0.0689	0.093	0.0003	0.0003	0.0003	0.0003	0.0003	0.0003	0.0003	0.0003	0.0003
MAPK10	0.0003	0.0104	0.0247	0.0003	0.0003	0.0003	0.0003	0.0135	0.0003	0.0003	0.0003	0.0003	0.0003	0.0003	0.0003	0.0003	0.0003
TUBGCP3	0.0003	0.0003	0.0003	0.0151	0.02	0.0003	0.0274	0.0148	0.0003	0.0003	0.0003	0.0362	0.0003	0.0003	0.1029	0.047	0.0544
SERPINA10	0.0003	0.0003	0.0349	0.0003	0.0003	0.1098	0.0003	0.0003	0.0003	0.0003	0.0003	0.2111	0.0003	0.0003	0.0003	0.0003	0.0003
IL6ST	0.0003	0.0003	0.035	0.0003	0.0003	0.0003	0.0003	0.0003	0.0003	0.0003	0.0003	0.0003	0.0003	0.0003	0.0003	0.0003	0.0003
CTAGE5	0.0352	0.0003	0.0003	0.0003	0.0003	0.0003	0.0003	0.0003	0.0003	0.0003	0.0003	0.0003	0.0003	0.0003	0.0003	0.0003	0.0003
LDLR	0.0352	0.0003	0.0003	0.0003	0.0003	0.0003	0.0003	0.0003	0.0003	0.0003	0.0003	0.0003	0.0003	0.0003	0.0003	0.0003	0.0003
PPP1R3D	0.0003	0.0352	0.0003	0.0003	0.0003	0.0003	0.0003	0.0003	0.0003	0.0003	0.0003	0.0003	0.0003	0.0003	0.0003	0.0003	0.0003
NAA16	0.0213	0.0143	0.0003	0.0003	0.0003	0.0003	0.0003	0.0003	0.0003	0.0003	0.0003	0.0003	0.0003	0.0003	0.0003	0.0003	0.0003
TLE1	0.0353	0.0003	0.0003	0.0003	0.0003	0.0003	0.0003	0.0003	0.0003	0.0003	0.0003	0.0003	0.0003	0.0003	0.0003	0.0003	0.0003
TLE3	0.0353	0.0003	0.0003	0.0003	0.0003	0.0003	0.0003	0.0003	0.0003	0.0003	0.0003	0.0003	0.0003	0.0003	0.0003	0.0003	0.0003
TLE4	0.0353	0.0003	0.0003	0.0003	0.0003	0.0003	0.0003	0.0003	0.0003	0.0003	0.0003	0.0003	0.0003	0.0003	0.0003	0.0003	0.0003
TRNT1	0.0003	0.0353	0.0003	0.0003	0.0003	0.0003	0.0003	0.0003	0.0003	0.0003	0.0003	0.0003	0.0003	0.0003	0.0003	0.0003	0.0003
PYROXD2	0.0003	0.0119	0.0003	0.0239	0.0003	0.0003	0.0003	0.0003	0.0003	0.0003	0.0003	0.0003	0.0003	0.0003	0.0003	0.0003	0.0003
SSH1	0.0003	0.0355	0.0003	0.0003	0.0003	0.0003	0.0003	0.0003	0.0003	0.0003	0.0003	0.0003	0.0003	0.0003	0.0003	0.0003	0.0003
CSTF1	0.0003	0.0357	0.0003	0.0003	0.0003	0.0003	0.0003	0.0003	0.0003	0.0003	0.0003	0.0003	0.0003	0.0003	0.0003	0.0003	0.0003
2021-09-14	0.0003	0.0003	0.028	0.0003	0.0082	0.0003	0.0003	0.0003	0.0003	0.0003	0.0003	0.0003	0.0003	0.0003	0.0003	0.0003	0.0003
DAPK2	0.0003	0.0003	0.0003	0.0003	0.036	0.0003	0.0003	0.0096	0.0003	0.0003	0.025	0.0003	0.0003	0.0003	0.0003	0.0003	0.0003
GRSF1	0.0003	0.0003	0.036	0.0003	0.0003	0.0003	0.0003	0.0003	0.0003	0.0003	0.0003	0.0003	0.0003	0.0003	0.0003	0.0003	0.0927
STX5	0.0003	0.0362	0.0003	0.0003	0.0003	0.0679	0.0003	0.0003	0.0003	0.0003	0.0003	0.0003	0.0003	0.0003	0.0003	0.0003	0.0726
COBLL1	0.0003	0.0363	0.0003	0.0003	0.0003	0.0003	0.0003	0.0003	0.0003	0.0003	0.0003	0.0003	0.0003	0.0003	0.0003	0.0003	0.0003
MFN1	0.0003	0.0003	0.0149	0.0003	0.0217	0.0003	0.0003	0.0003	0.0003	0.0003	0.1231	0.0003	0.0003	0.0003	0.0003	0.0003	0.0003
MYEF2	0.0003	0.0003	0.0003	0.0363	0.0003	0.0003	0.0003	0.0003	0.0003	0.0003	0.3471	0.0003	0.0003	0.0003	0.0003	0.0003	0.0003
TRAF2	0.0003	0.0246	0.0003	0.0003	0.0122	0.0003	0.0003	0.0003	0.0003	0.0003	0.0003	0.0003	0.0003	0.0003	0.0003	0.0003	0.0003
C1orf27	0.0003	0.0366	0.0003	0.0003	0.0003	0.0003	0.0003	0.0003	0.0003	0.0003	0.0003	0.0003	0.0003	0.0003	0.0003	0.0003	0.0501
ABCB6	0.0367	0.0003	0.0003	0.0003	0.0003	0.0003	0.0003	0.0003	0.0003	0.0003	0.0003	0.0003	0.0003	0.0003	0.0003	0.0003	0.0003
USP46	0.0178	0.0003	0.0003	0.0192	0.0003	0.0003	0.0003	0.0003	0.0003	0.0003	0.0003	0.0003	0.0003	0.0003	0.015	0.0003	0.0003
DST	0.0329	0.0041	0.0003	0.0003	0.0003	0.0003	0.006	0.0003	0.0003	0.0049	0.0003	0.0003	0.0003	0.0003	0.0003	0.0003	0.0077
BOK	0.0003	0.0003	0.0369	0.0003	0.0003	0.0003	0.0003	0.0003	0.0003	0.0003	0.0003	0.0003	0.0003	0.0003	0.0003	0.0003	0.0003
REPS1	0.0003	0.0003	0.0371	0.0003	0.0003	0.0003	0.0003	0.0159	0.0003	0.0003	0.0003	0.0003	0.0003	0.0003	0.0003	0.0003	0.0003
HMG20A	0.0003	0.0372	0.0003	0.0003	0.0003	0.0003	0.0003	0.0003	0.0003	0.0003	0.0003	0.0003	0.0003	0.0003	0.0003	0.0003	0.0003
CYR61	0.0003	0.0003	0.0003	0.0372	0.0003	0.0003	0.0003	0.0003	0.0003	0.0003	0.0003	0.0003	0.0003	0.0003	0.0251	0.0003	0.0003
POLRMT	0.0003	0.0373	0.0003	0.0003	0.0003	0.0003	0.0003	0.0003	0.0003	0.0003	0.0003	0.0003	0.0433	0.0003	0.0573	0.0003	0.0003
PYCR2	0.0003	0.0375	0.0003	0.0003	0.0003	0.1292	0.0003	0.0003	0.0003	0.0003	0.0003	0.0003	0.0003	0.0003	0.0003	0.1046	0.1148
TMEM68	0.0003	0.0376	0.0003	0.0003	0.0003	0.0003	0.0003	0.0003	0.0003	0.0003	0.0003	0.0003	0.0003	0.0003	0.0003	0.0003	0.0003
EXPH5	0.0378	0.0003	0.0003	0.0003	0.0003	0.0003	0.0003	0.0003	0.0003	0.0003	0.0003	0.0003	0.0003	0.0003	0.0003	0.0003	0.0003
SLC16A3	0.0003	0.0378	0.0003	0.0003	0.0003	0.0757	0.0003	0.0003	0.0084	0.0307	0.0003	0.0186	0.0003	0.0003	0.0491	0.0599	0.0003
MRPS9	0.0003	0.0003	0.0379	0.0003	0.0003	0.0003	0.0003	0.0003	0.0003	0.0003	0.0003	0.0003	0.0003	0.0003	0.0003	0.0003	0.0003
STX10	0.0003	0.0003	0.0003	0.0003	0.0382	0.0003	0.0003	0.0003	0.0003	0.0003	0.0003	0.0003	0.0003	0.0003	0.0003	0.0003	0.0003
CCDC70	0.0003	0.0383	0.0003	0.0003	0.0003	0.0003	0.0003	0.0003	0.0003	0.0003	0.0003	0.0003	0.0003	0.0003	0.0003	0.0003	0.0003
MGA	0.006	0.006	0.0157	0.005	0.0068	0.0477	0.0066	0.0025	0.0137	0.007	0.0066	0.0082	0.0139	0.0126	0.0166	0.0216	0.0691
SLC2A14	0.0003	0.0003	0.0003	0.0384	0.0003	0.0003	0.0268	0.0003	0.0003	0.0003	0.0439	0.0566	0.0003	0.0003	0.0003	0.0003	0.0003
EXOSC10	0.0386	0.0003	0.0003	0.0003	0.0003	0.0003	0.0003	0.0003	0.0003	0.0003	0.0003	0.0003	0.0003	0.0003	0.0003	0.0003	0.0003
FAM203A	0.0303	0.0086	0.0003	0.0003	0.0003	0.0003	0.0003	0.0003	0.0003	0.0003	0.0003	0.0003	0.0003	0.0003	0.0003	0.0003	0.0003
FAM203B	0.0303	0.0086	0.0003	0.0003	0.0003	0.0003	0.0003	0.0003	0.0003	0.0003	0.0003	0.0003	0.0003	0.0003	0.0003	0.0003	0.0003
TRAF6	0.0003	0.0003	0.0003	0.0003	0.0386	0.0003	0.0003	0.0003	0.0003	0.0003	0.0003	0.0003	0.0003	0.0003	0.0003	0.0003	0.0003
USP12	0.0187	0.0003	0.0003	0.0202	0.0003	0.0003	0.0003	0.0003	0.0003	0.0003	0.0003	0.0003	0.0003	0.0003	0.0157	0.0003	0.0003
VPS18	0.0386	0.0003	0.0003	0.0003	0.0003	0.0003	0.0003	0.0003	0.0003	0.0003	0.0003	0.0003	0.0003	0.0003	0.0003	0.0193	0.0003
CRYM	0.0003	0.0388	0.0003	0.0003	0.0003	0.0003	0.0003	0.0003	0.0003	0.0003	0.0003	0.0003	0.0003	0.0003	0.0003	0.0003	0.0003
RBM27	0.0388	0.0003	0.0003	0.0003	0.0003	0.0003	0.0003	0.0003	0.0003	0.0003	0.0003	0.0003	0.0003	0.0003	0.0003	0.0003	0.0003
TBK1	0.0003	0.0003	0.0388	0.0003	0.0003	0.0003	0.0003	0.0003	0.0003	0.0003	0.0003	0.0003	0.0003	0.0003	0.0003	0.0003	0.0003
AARSD1	0.0389	0.0003	0.0003	0.0003	0.0003	0.0003	0.0003	0.0003	0.0003	0.0003	0.0003	0.0003	0.0003	0.0003	0.0443	0.0003	0.1439
ARMCX4	0.0003	0.0003	0.0003	0.0003	0.039	0.0003	0.0003	0.0003	0.0003	0.0003	0.0003	0.0003	0.0003	0.0003	0.0003	0.0003	0.0003
SMARCA1	0.0316	0.0003	0.0077	0.0003	0.0003	0.0003	0.0053	0.0003	0.0003	0.0003	0.0003	0.0017	0.0003	0.0003	0.0003	0.0052	0.0055
RASA1	0.0003	0.0083	0.0222	0.0091	0.0003	0.0245	0.0057	0.0003	0.0003	0.0003	0.0003	0.0003	0.0003	0.0003	0.0003	0.0003	0.0246
FYTTD1	0.0003	0.0003	0.0003	0.0003	0.0392	0.0003	0.0003	0.0003	0.0003	0.0003	0.0003	0.0003	0.0003	0.0003	0.0003	0.0003	0.0003
DPP9	0.0003	0.0394	0.0003	0.0003	0.0003	0.0003	0.0003	0.0084	0.0003	0.0003	0.0003	0.0003	0.0003	0.0003	0.0003	0.0003	0.0003
AGPS	0.0003	0.0117	0.0282	0.0003	0.0003	0.0365	0.0003	0.0003	0.0003	0.0003	0.0003	0.0003	0.0003	0.0003	0.0003	0.176	0.0003
ENPP1	0.0003	0.0003	0.0396	0.0003	0.0003	0.0003	0.2443	0.0003	0.0003	0.0003	0.0003	0.0003	0.0003	0.0003	0.0284	0.0003	0.0003
ACE2	0.0003	0.0397	0.0003	0.0003	0.0003	0.0003	0.0003	0.0003	0.0003	0.0003	0.0003	0.0003	0.0003	0.0003	0.0003	0.0003	0.0003
CPA6	0.0003	0.0397	0.0003	0.0003	0.0003	0.0003	0.0003	0.0003	0.0003	0.0003	0.0003	0.0003	0.0003	0.0003	0.0003	0.0003	0.0003
PTPRF	0.0003	0.0003	0.0398	0.0003	0.0003	0.0003	0.0003	0.0003	0.0003	0.0003	0.0003	0.0003	0.0003	0.0003	0.0003	0.0003	0.0003
PLEKHA7	0.0229	0.0173	0.0003	0.0003	0.0003	0.0003	0.0003	0.0003	0.0003	0.0003	0.0003	0.0003	0.0003	0.0003	0.0003	0.0003	0.0003
CPSF3	0.0228	0.0174	0.0003	0.0003	0.0003	0.0003	0.0003	0.0003	0.0003	0.0003	0.0003	0.0003	0.0003	0.0003	0.0095	0.0003	0.0003
POLDIP2	0.04	0.0003	0.0003	0.0003	0.0003	0.0003	0.0003	0.0003	0.0003	0.0003	0.0003	0.0003	0.0003	0.0003	0.0003	0.0003	0.0003
BAIAP3	0.0003	0.0003	0.0003	0.0003	0.04	0.0003	0.0003	0.1164	0.0003	0.0774	0.0003	0.0843	0.0003	0.0003	0.0003	0.0003	0.0003
HSPA14	0.0402	0.0003	0.0003	0.0003	0.0003	0.0003	0.0003	0.0003	0.0003	0.0003	0.0003	0.0003	0.0003	0.0003	0.0003	0.0003	0.0003
CIT	0.0003	0.0003	0.0403	0.0003	0.0003	0.0003	0.0003	0.0003	0.0003	0.0003	0.0003	0.0003	0.0003	0.0003	0.0003	0.0003	0.0003
SIRT5	0.0003	0.0403	0.0003	0.0003	0.0003	0.0003	0.0003	0.0003	0.0003	0.0003	0.0003	0.0003	0.0003	0.0003	0.0003	0.0003	0.0003
DOCK7	0.0329	0.0003	0.0003	0.0003	0.0077	0.0003	0.0003	0.0003	0.0003	0.0003	0.0003	0.0003	0.0003	0.0003	0.0003	0.0153	0.0003
PTBP3	0.0406	0.0003	0.0003	0.0003	0.0003	0.0003	0.0003	0.0003	0.0003	0.0003	0.0003	0.0003	0.0003	0.0003	0.0003	0.0003	0.0003
MTA1	0.0003	0.016	0.0003	0.0003	0.0249	0.0003	0.0003	0.0003	0.0003	0.0003	0.0003	0.0003	0.0003	0.033	0.0381	0.0003	0.0003
ARHGAP18	0.0003	0.0408	0.0003	0.0003	0.0003	0.0003	0.0003	0.0003	0.0003	0.0003	0.0003	0.0003	0.0003	0.0003	0.0003	0.0003	0.0003
PDCD11	0.0289	0.0122	0.0003	0.0003	0.0003	0.0003	0.0003	0.0003	0.0003	0.0003	0.0003	0.0003	0.0003	0.0003	0.0003	0.0003	0.0003
AKT3	0.0003	0.0003	0.0003	0.0003	0.0408	0.0003	0.0003	0.0287	0.0003	0.0003	0.0003	0.0003	0.0003	0.0003	0.0003	0.0003	0.0003
SLC2A3	0.0003	0.0003	0.0003	0.0408	0.0003	0.0003	0.0285	0.0003	0.0003	0.0003	0.0467	0.0601	0.0003	0.0003	0.0003	0.0003	0.0003
CHMP6	0.0003	0.0003	0.0409	0.0003	0.0003	0.0003	0.0003	0.0003	0.0003	0.0003	0.0003	0.0003	0.0003	0.0003	0.0003	0.0003	0.0003
GPX8	0.0003	0.041	0.0003	0.0003	0.0003	0.638	0.0003	0.0003	0.0003	0.0003	0.0003	0.0003	0.0255	0.716	0.0003	0.617	0.4966
ITFG3	0.0003	0.0003	0.0003	0.0003	0.0412	0.0003	0.0003	0.0003	0.0003	0.0003	0.0003	0.0003	0.0003	0.0003	0.0003	0.0003	0.0003
TLE2	0.0412	0.0003	0.0003	0.0003	0.0003	0.0003	0.0003	0.0003	0.0003	0.0003	0.0003	0.0003	0.0003	0.0003	0.0003	0.0003	0.0003
HLA-DPB1	0.0414	0.0003	0.0003	0.0003	0.0003	0.0003	0.0134	0.0003	0.0063	0.0003	0.0003	0.0096	0.0169	0.0377	0.0147	0.0003	0.0259
KLC2	0.0194	0.0003	0.0003	0.0224	0.0003	0.041	0.0003	0.0464	0.0003	0.0003	0.032	0.0003	0.0003	0.0003	0.0003	0.0003	0.0003
APTX	0.0003	0.0416	0.0003	0.0003	0.0003	0.0003	0.0003	0.0003	0.0003	0.0003	0.0003	0.0003	0.0003	0.0003	0.0003	0.0003	0.0003
HSPA13	0.0003	0.0003	0.0003	0.0003	0.0416	0.0003	0.0003	0.0003	0.0003	0.0003	0.0003	0.0003	0.0003	0.0003	0.0003	0.0003	1.2806
MAPK8IP3	0.0418	0.0003	0.0003	0.0003	0.0003	0.0003	0.0003	0.0003	0.0003	0.0003	0.0003	0.0003	0.0003	0.0003	0.0003	0.0003	0.0003
PPIAL4G	0.0178	0.0073	0.0147	0.0029	0.0003	0.0212	0.0188	0.0035	0.0003	0.0003	0.0003	0.0027	0.0003	0.0003	0.0043	0.0089	0.0098
PIK3CA	0.0003	0.0003	0.0419	0.0003	0.0003	0.0003	0.0003	0.0003	0.0003	0.0003	0.0003	0.0003	0.0003	0.0003	0.0003	0.0003	0.0003
SCUBE3	0.0003	0.0003	0.0419	0.0003	0.0003	0.0003	0.0003	0.0569	0.0003	0.0003	0.0003	0.0003	0.0003	0.0003	0.0003	0.0003	0.0003
ACADL	0.0003	0.0003	0.0422	0.0003	0.0003	0.0003	0.0003	0.0003	0.0003	0.0003	0.0003	0.0003	0.0003	0.0003	0.0003	0.0003	0.0003
SEC22A	0.0423	0.0003	0.0003	0.0003	0.0003	0.0003	0.0003	0.0003	0.0003	0.0003	0.0003	0.0003	0.0003	0.0003	0.0003	0.0003	0.0003
FRYL	0.0003	0.0003	0.0139	0.0003	0.0288	0.0003	0.0003	0.0003	0.0003	0.0003	0.0003	0.0003	0.0003	0.0003	0.0003	0.0003	0.0125
KCTD1	0.0003	0.0003	0.0003	0.0188	0.0241	0.02	0.0003	0.0003	0.0003	0.0003	0.0003	0.0155	0.0003	0.0353	0.0184	0.0313	0.0347
ATL1	0.0003	0.0003	0.0426	0.0003	0.0003	0.0003	0.0003	0.0003	0.0003	0.0003	0.0003	0.0003	0.0003	0.0003	0.0987	0.0003	0.1545
PIH1D1	0.0003	0.0003	0.0427	0.0003	0.0003	0.0214	0.0003	0.0003	0.0003	0.0003	0.0003	0.0003	0.0003	0.0404	0.0295	0.0498	0.0739
CORO7-PAM16	0.0406	0.0029	0.0003	0.0003	0.0003	0.0003	0.0003	0.0003	0.0003	0.0003	0.0003	0.0003	0.0003	0.0003	0.0003	0.0003	0.0003
SSPN	0.0003	0.0003	0.0432	0.0003	0.0003	0.0003	0.0003	0.0003	0.0003	0.0003	0.0003	0.0003	0.0003	0.0003	0.0003	0.0003	0.0003
REL	0.0342	0.0096	0.0003	0.0003	0.0003	0.0003	0.0003	0.0003	0.0003	0.0003	0.0003	0.0003	0.0003	0.0003	0.0003	0.0003	0.0003
WDR26	0.0003	0.026	0.0003	0.0003	0.0178	0.0003	0.0003	0.0003	0.0003	0.0003	0.0003	0.0003	0.0003	0.0003	0.0003	0.0003	0.012
ACE	0.0003	0.0003	0.0003	0.0003	0.0435	0.0339	0.0003	0.0003	0.0281	0.0003	0.0003	0.0003	0.0928	0.0003	0.0003	0.0667	0.0003
ARL6IP6	0.0003	0.0438	0.0003	0.0003	0.0003	0.0003	0.0003	0.0003	0.0003	0.0003	0.0003	0.0003	0.0003	0.0003	0.0003	0.0003	0.0003
NPC1	0.0003	0.0003	0.0003	0.0003	0.0438	0.0003	0.0003	0.0003	0.0003	0.0003	0.0003	0.0003	0.0003	0.0003	0.0003	0.0003	0.0003
RIC8B	0.0003	0.0249	0.0003	0.0003	0.0192	0.0003	0.0003	0.0003	0.0003	0.0003	0.0003	0.0003	0.0003	0.0003	0.0003	0.0003	0.0003
GSPT2	0.0003	0.0003	0.0439	0.0003	0.0003	0.0003	0.0003	0.0105	0.0003	0.0003	0.0003	0.0003	0.0003	0.0003	0.0003	0.0003	0.0003
NET1	0.0003	0.0441	0.0003	0.0003	0.0003	0.0003	0.0003	0.0003	0.0003	0.0003	0.0003	0.0003	0.0003	0.0003	0.0003	0.0003	0.0003
PCDHGC3	0.0003	0.0003	0.0003	0.0441	0.0003	0.0003	0.0003	0.0003	0.0003	0.0003	0.0003	0.0003	0.0003	0.0003	0.0003	0.0003	0.0003
ZER1	0.0003	0.0003	0.0441	0.0003	0.0003	0.0003	0.0135	0.0003	0.0003	0.0003	0.0003	0.0003	0.0003	0.0003	0.0003	0.0003	0.0003
STK11IP	0.0003	0.0003	0.0003	0.0446	0.0003	0.0003	0.0003	0.0003	0.0003	0.0003	0.0003	0.0003	0.0003	0.0003	0.0003	0.0003	0.0003
RNMT	0.0447	0.0003	0.0003	0.0003	0.0003	0.0003	0.0003	0.0003	0.0003	0.0003	0.0003	0.0003	0.0003	0.0003	0.0003	0.0003	0.1945
CPN1	0.0003	0.0003	0.0003	0.0449	0.0003	0.0737	0.0003	0.0003	0.0003	0.0003	0.0003	0.0382	0.0003	0.0368	0.0003	0.0003	0.0003
NOLC1	0.0003	0.0003	0.0157	0.0295	0.0003	0.1451	0.0302	0.0003	0.0441	0.0003	0.0003	0.0395	0.0003	0.1399	0.0003	0.135	0.1708
BSN	0.0003	0.0003	0.045	0.0003	0.0003	0.0003	0.0003	0.0003	0.0003	0.0003	0.0003	0.0003	0.0003	0.0003	0.0003	0.0003	0.0003
MYO18B	0.0186	0.0003	0.0269	0.0003	0.0003	0.0003	0.0003	0.0003	0.0003	0.0003	0.0003	0.0003	0.0003	0.0003	0.0003	0.0003	0.0003
ATP6V1C2	0.0453	0.0003	0.0003	0.0003	0.0003	0.0003	0.0003	0.0003	0.0003	0.0003	0.0003	0.0003	0.0003	0.0003	0.0003	0.0003	0.0003
ICMT	0.0003	0.0453	0.0003	0.0003	0.0003	0.0003	0.0003	0.0003	0.0003	0.0003	0.0003	0.0003	0.0003	0.0003	0.0003	0.0003	0.0003
TRIM3	0.0003	0.0003	0.0003	0.0003	0.0453	0.0003	0.0003	0.0003	0.0003	0.0003	0.0003	0.0003	0.0003	0.0003	0.0003	0.0003	0.0003
TARS2	0.0003	0.0454	0.0003	0.0003	0.0003	0.0003	0.0003	0.0003	0.0003	0.0003	0.0003	0.0003	0.0003	0.0003	0.0003	0.0003	0.0003
TRIP4	0.0454	0.0003	0.0003	0.0003	0.0003	0.0003	0.0003	0.0003	0.0003	0.0003	0.0003	0.0003	0.0003	0.0003	0.0003	0.0003	0.0003
SHISA4	0.0003	0.0003	0.0003	0.0455	0.0003	0.0003	0.0003	0.0003	0.0003	0.0003	0.0003	0.0003	0.0003	0.0003	0.1403	0.0003	0.0003
GSDMB	0.0003	0.0456	0.0003	0.0003	0.0003	0.0003	0.0003	0.0003	0.0003	0.0003	0.0003	0.0003	0.0003	0.0003	0.0003	0.0003	0.0003
SOWAHC	0.0456	0.0003	0.0003	0.0003	0.0003	0.0003	0.0003	0.0003	0.0003	0.0003	0.0003	0.0003	0.0003	0.0003	0.0003	0.0003	0.0003
FAM91A1	0.0457	0.0003	0.0003	0.0003	0.0003	0.0003	0.0003	0.0003	0.0003	0.0003	0.0003	0.0003	0.0003	0.0003	0.0003	0.0003	0.0003
MAP4K5	0.0003	0.0458	0.0003	0.0003	0.0003	0.0003	0.0003	0.0003	0.0003	0.0003	0.0003	0.0003	0.0003	0.0003	0.0003	0.0003	0.0003
DNMT1	0.0459	0.0003	0.0003	0.0003	0.0003	0.0003	0.0003	0.0003	0.0003	0.0003	0.0003	0.0003	0.0003	0.0003	0.0003	0.0003	0.0003
ALCAM	0.0003	0.0459	0.0003	0.0003	0.0003	0.0003	0.0291	0.0003	0.0003	0.0003	0.0003	0.0003	0.0003	0.0003	0.0003	0.0003	0.0003
LMTK2	0.0003	0.0003	0.0003	0.046	0.0003	0.0151	0.0003	0.0003	0.0003	0.0003	0.0003	0.0003	0.0003	0.0003	0.0003	0.0003	0.0003
BCCIP	0.0003	0.0461	0.0003	0.0003	0.0003	0.0003	0.0003	0.0003	0.0003	0.0003	0.0003	0.0003	0.0003	0.0003	0.0003	0.0003	0.0003
PTPN13	0.0461	0.0003	0.0003	0.0003	0.0003	0.0003	0.0003	0.0003	0.0003	0.0003	0.0003	0.0003	0.0003	0.0003	0.0003	0.0003	0.0003
TAF4B	0.0003	0.0003	0.0003	0.0463	0.0003	0.0003	0.0003	0.0003	0.0003	0.0003	0.0003	0.0003	0.0003	0.0003	0.0003	0.0003	0.0003
COL4A4	0.0003	0.0003	0.0205	0.0263	0.0003	0.0003	0.0115	0.0003	0.0003	0.0003	0.0003	0.0003	0.0003	0.0003	0.0271	0.0003	0.0003
WDR43	0.0003	0.0466	0.0003	0.0003	0.0003	0.0003	0.0003	0.0003	0.0003	0.0003	0.0003	0.0003	0.0003	0.0003	0.0003	0.0003	0.0003
PRPF4B	0.0467	0.0003	0.0003	0.0003	0.0003	0.0564	0.0003	0.0003	0.0003	0.0003	0.0003	0.0003	0.0003	0.0003	0.0003	0.0003	0.0575
ABHD6	0.0003	0.0003	0.0468	0.0003	0.0003	0.0003	0.0003	0.0003	0.0003	0.0003	0.0003	0.0003	0.0003	0.0003	0.0003	0.0003	0.0003
FOXK1	0.047	0.0003	0.0003	0.0003	0.0003	0.0003	0.0003	0.0003	0.0003	0.0003	0.0003	0.0003	0.0003	0.0003	0.0003	0.0003	0.0003
ZNF813	0.0003	0.0003	0.047	0.0003	0.0003	0.0003	0.0003	0.0003	0.0003	0.0003	0.0003	0.0003	0.0003	0.0003	0.0003	0.0003	0.0003
SYNE3	0.0003	0.0003	0.0152	0.0213	0.0111	0.0598	0.0003	0.0003	0.0848	0.0003	0.0145	0.0131	0.0968	0.0349	0.0924	0.0892	0.0293
MYO1H	0.0003	0.0003	0.0003	0.0472	0.0003	0.0003	0.0003	0.0003	0.0003	0.0003	0.0003	0.0003	0.0003	0.0003	0.0003	0.0003	0.0003
DUOX2	0.0244	0.0233	0.0003	0.0003	0.0003	0.0003	0.0003	0.0003	0.0003	0.0003	0.0003	0.0003	0.0003	0.0003	0.0003	0.0003	0.0003
PTK6	0.0003	0.0474	0.0003	0.0003	0.0003	0.0003	0.0003	0.0003	0.0003	0.0003	0.0003	0.0003	0.0003	0.0003	0.0003	0.0003	0.0003
TBC1D2	0.0475	0.0003	0.0003	0.0003	0.0003	0.0003	0.0003	0.0003	0.0003	0.0003	0.0003	0.0003	0.0003	0.0003	0.0003	0.0003	0.0003
EXOC8	0.0352	0.0003	0.0003	0.0127	0.0003	0.0003	0.0003	0.0003	0.0003	0.0003	0.0003	0.0003	0.0003	0.0003	0.0003	0.0003	0.0003
CDKN2AIP	0.0003	0.0479	0.0003	0.0003	0.0003	0.0003	0.0003	0.0003	0.0003	0.0003	0.0003	0.0003	0.0003	0.0003	0.0003	0.0003	0.0003
IQGAP3	0.0202	0.0186	0.0098	0.0003	0.0003	0.0003	0.0003	0.0003	0.0003	0.0003	0.0003	0.0003	0.0003	0.0003	0.0003	0.0003	0.0003
MRPL48	0.0003	0.048	0.0003	0.0003	0.0003	0.0003	0.0003	0.0003	0.0003	0.0003	0.0003	0.0003	0.0003	0.0003	0.0003	0.0003	0.0003
PODXL	0.048	0.0003	0.0003	0.0003	0.0003	0.0003	0.0003	0.0003	0.0003	0.0003	0.0003	0.0003	0.0003	0.0003	0.0003	0.0003	0.0003
GNAL	0.0003	0.0279	0.0154	0.0003	0.0053	0.0003	0.013	0.003	0.0003	0.0003	0.0003	0.0003	0.0003	0.0003	0.0043	0.0003	0.0003
CACNA2D2	0.0482	0.0003	0.0003	0.0003	0.0003	0.0003	0.0003	0.0003	0.0003	0.0003	0.0003	0.0003	0.0003	0.0003	0.0003	0.0003	0.0003
KLF5	0.0484	0.0003	0.0003	0.0003	0.0003	0.0003	0.0003	0.0003	0.0003	0.0003	0.0003	0.0003	0.0003	0.0003	0.0003	0.0003	0.0003
LRSAM1	0.0485	0.0003	0.0003	0.0003	0.0003	0.0003	0.0003	0.0003	0.0003	0.0003	0.0003	0.0003	0.0003	0.0003	0.0003	0.0003	0.0003
TAMM41	0.0003	0.0003	0.0486	0.0003	0.0003	0.0003	0.0003	0.0003	0.0003	0.0003	0.0003	0.0003	0.0003	0.0003	0.0003	0.0003	0.0003
TYMS	0.0488	0.0003	0.0003	0.0003	0.0003	0.0003	0.0003	0.0003	0.0003	0.0003	0.0003	0.0003	0.0003	0.0003	0.0003	0.0003	0.0003
NGLY1	0.0003	0.0491	0.0003	0.0003	0.0003	0.0445	0.0003	0.0003	0.0003	0.0003	0.0114	0.0003	0.0003	0.0003	0.0247	0.0207	0.0955
NUP133	0.0493	0.0003	0.0003	0.0003	0.0003	0.0003	0.0003	0.0003	0.0003	0.0003	0.0003	0.0003	0.0003	0.0003	0.0003	0.0003	0.0003
UGT1A4	0.0476	0.0021	0.0003	0.0003	0.0003	0.0003	0.0003	0.0003	0.0003	0.0003	0.0003	0.0003	0.0003	0.0003	0.0003	0.0003	0.0003
PTK2B	0.0219	0.0003	0.0278	0.0003	0.0003	0.0003	0.0106	0.0003	0.0003	0.0003	0.0104	0.0003	0.0003	0.0003	0.0003	0.0003	0.0003
ARHGEF10L	0.029	0.0207	0.0003	0.0003	0.0003	0.0003	2.8156	0.0003	0.0003	0.0003	0.0003	0.0003	0.0003	0.0003	1.167	0.0003	0.0003
LSM14B	0.0495	0.0003	0.0003	0.0003	0.0003	0.0003	0.0003	0.0003	0.0003	0.0003	0.0003	0.0003	0.0003	0.0003	0.0003	0.0003	0.0003
MICAL3	0.0003	0.0003	0.0495	0.0003	0.0003	0.0003	0.0003	0.0003	0.0003	0.0003	0.0003	0.0003	0.0003	0.0003	0.0003	0.0003	0.0003
CRTAP	0.0003	0.0495	0.0003	0.0003	0.0003	0.6697	0.0003	0.0003	0.0003	0.0003	0.0003	0.0003	2.5368	2.5672	0.0003	1.9944	1.8944
HBM	0.0003	0.0003	0.0003	0.0496	0.0003	0.0003	0.0003	0.0003	0.0003	0.0003	0.0003	0.0003	0.0003	0.0003	0.0003	0.0003	0.0003
TOR1B	0.0498	0.0003	0.0003	0.0003	0.0003	0.0003	0.0003	0.0003	0.0003	0.0003	0.0003	0.0003	0.0003	0.0003	0.0003	0.0003	0.0003
COL11A1	0.0003	0.0167	0.0078	0.0003	0.026	0.2971	0.0293	0.0087	0.399	0.1071	0.0341	0.064	0.4605	0.4839	0.0003	0.3905	0.1481
DNAJB8	0.0003	0.0003	0.0501	0.0003	0.0003	0.0003	0.0003	0.0003	0.0003	0.0003	0.0003	0.0003	0.0003	0.0003	0.0003	0.0003	0.0003
OSBPL2	0.0003	0.032	0.0186	0.0003	0.0003	0.0003	0.0003	0.0003	0.0003	0.0003	0.0003	0.0003	0.0003	0.0003	0.0003	0.0003	0.0003
APP	0.0003	0.0003	0.0003	0.0003	0.0503	0.0003	0.0003	0.0003	0.0003	0.0003	0.0003	0.0123	0.0003	0.0003	0.0003	0.0003	0.0003
ZADH2	0.0003	0.0003	0.0003	0.0503	0.0003	0.0003	0.0003	0.0003	0.0003	0.0003	0.0003	0.0235	0.0003	0.0003	0.0737	0.0003	0.0003
OGFR	0.0503	0.0003	0.0003	0.0003	0.0003	0.0569	0.0548	0.0003	0.0003	0.0003	0.1015	0.0003	0.0003	0.0003	0.0003	0.9261	0.0958
PTPLAD2	0.0003	0.0003	0.0003	0.0505	0.0003	0.0003	0.0003	0.0003	0.0003	0.0003	0.0003	0.0003	0.0003	0.0003	0.0003	0.0003	0.0003
TRAPPC5	0.0003	0.0505	0.0003	0.0003	0.0003	0.0003	0.0003	0.0003	0.0003	0.0003	0.0003	0.0003	0.0003	0.0003	0.0003	0.0003	0.0003
WNT5B	0.0003	0.0506	0.0003	0.0003	0.0003	0.0003	0.0003	0.0003	0.0003	0.0003	0.0003	0.0003	0.0003	0.0003	0.0003	0.0003	0.0003
C3orf58	0.0003	0.0003	0.0003	0.0508	0.0003	0.0003	0.0003	0.0003	0.0003	0.0003	0.0003	0.0003	0.0003	0.0003	0.0003	0.0003	0.0003
OCIAD2	0.0003	0.0508	0.0003	0.0003	0.0003	0.0003	0.0003	0.0003	0.0003	0.0003	0.0003	0.0003	0.0003	0.0003	0.0003	0.0003	0.0003
PPP1R21	0.0288	0.0003	0.0224	0.0003	0.0003	0.0003	0.0003	0.0003	0.0003	0.0003	0.0003	0.0003	0.0003	0.0003	0.0003	0.0003	0.0003
RBFOX2	0.0003	0.0003	0.0003	0.0511	0.0003	0.0003	0.0341	0.0003	0.0003	0.0003	0.0003	0.0003	0.0003	0.0003	0.0986	0.0003	0.1491
RILPL1	0.0003	0.0003	0.0512	0.0003	0.0003	0.0003	0.0003	0.0003	0.0003	0.0003	0.0003	0.0003	0.0003	0.0003	0.0003	0.0003	0.0003
UGT1A3	0.0494	0.0021	0.0003	0.0003	0.0003	0.0003	0.0003	0.0003	0.0003	0.0003	0.0003	0.0003	0.0003	0.0003	0.0003	0.0003	0.0003
UGT1A5	0.0494	0.0021	0.0003	0.0003	0.0003	0.0003	0.0003	0.0003	0.0003	0.0003	0.0003	0.0003	0.0003	0.0003	0.0003	0.0003	0.0003
RAB9B	0.0003	0.0003	0.0003	0.0003	0.0513	0.0003	0.0003	0.0003	0.0003	0.0003	0.0003	0.0003	0.0003	0.0003	0.0003	0.0003	0.0003
MTOR	0.0098	0.0003	0.0282	0.0139	0.0003	0.0003	0.0063	0.0003	0.0003	0.0003	0.0003	0.0003	0.0003	0.0003	0.0003	0.0003	0.0003
OTUD4	0.0003	0.0513	0.0003	0.0003	0.0003	0.0003	0.0074	0.0003	0.0003	0.0003	0.0003	0.0003	0.0003	0.0003	0.0003	0.0003	0.0003
TM9SF1	0.0514	0.0003	0.0003	0.0003	0.0003	0.0538	0.0003	0.0003	0.0003	0.0003	0.0003	0.0003	0.0003	0.0658	0.0003	0.0003	0.0003
EPB41L3	0.0003	0.0003	0.031	0.0076	0.0134	0.0003	0.1149	0.0003	0.0337	0.0218	0.0003	0.0477	0.014	0.024	0.0336	0.2401	0.1819
RASAL1	0.0003	0.0515	0.0003	0.0003	0.0003	0.0003	0.0003	0.0003	0.0003	0.0003	0.0003	0.0003	0.0003	0.0003	0.0003	0.0003	0.0003
PTPRZ1	0.0003	0.0517	0.0003	0.0003	0.0003	0.0003	0.0003	0.0003	0.0003	0.0003	0.0003	0.0003	0.0003	0.0003	0.0003	0.0003	0.0003
SYNE1	0.0003	0.0066	0.0249	0.0101	0.011	0.0289	0.0038	0.0102	0.0037	0.0035	0.0105	0.005	0.0003	0.0003	0.0049	0.0003	0.0124
CORO7	0.0486	0.0035	0.0003	0.0003	0.0003	0.0003	0.0003	0.0003	0.0003	0.0003	0.0003	0.0003	0.0003	0.0003	0.0003	0.0003	0.0003
SERINC1	0.0003	0.0003	0.0518	0.0003	0.0003	0.0003	0.0003	0.0003	0.0003	0.0003	0.0003	0.0003	0.0003	0.0003	0.0003	0.0003	0.0003
USP8	0.0003	0.0003	0.04	0.0003	0.0123	0.0003	0.0003	0.0003	0.0003	0.0003	0.0003	0.0494	0.0003	0.0357	0.0003	0.0003	0.1741
LARS2	0.042	0.0003	0.0104	0.0003	0.0003	0.0003	0.0003	0.0003	0.0003	0.0003	0.0003	0.0003	0.0003	0.0003	0.0003	0.0003	0.0003
TRIM65	0.0521	0.0003	0.0003	0.0003	0.0003	0.0003	0.0003	0.0003	0.0003	0.0003	0.0003	0.0003	0.0003	0.0003	0.0003	0.0172	0.0003
MYO1F	0.0003	0.0263	0.018	0.0085	0.0003	0.0189	0.0036	0.0003	0.0225	0.0003	0.0298	0.0003	0.0003	0.019	0.0036	0.0734	0.0539
RBFOX1	0.0003	0.0003	0.0003	0.0522	0.0003	0.0003	0.0348	0.0003	0.0003	0.0003	0.0003	0.0003	0.0003	0.0003	0.1006	0.0003	0.1522
CBL	0.0003	0.0003	0.0523	0.0003	0.0003	0.0003	0.0051	0.0003	0.0003	0.0003	0.0003	0.0003	0.0003	0.0003	0.0003	0.0003	0.0003
C1RL	0.0003	0.0523	0.0003	0.0003	0.0003	0.1443	0.0234	0.0362	0.0003	0.2337	0.0737	0.0075	0.0003	0.6388	0.0003	0.0003	0.0003
MOK	0.0003	0.0003	0.0003	0.0527	0.0003	0.0003	0.0003	0.0003	0.0003	0.0003	0.0003	0.0003	0.0003	0.0003	0.0003	0.0003	0.0003
PARD3	0.0416	0.0114	0.0003	0.0003	0.0003	0.0003	0.0003	0.0003	0.0003	0.0003	0.0003	0.0003	0.0003	0.0003	0.0003	0.0003	0.0003
PIK3R1	0.0003	0.0003	0.0528	0.0003	0.0003	0.0003	0.0003	0.0003	0.0003	0.0003	0.0003	0.0003	0.0003	0.0003	0.0003	0.3635	0.0003
RAB11FIP2	0.0532	0.0003	0.0003	0.0003	0.0003	0.0003	0.0003	0.0003	0.0003	0.0003	0.0003	0.0003	0.0003	0.0003	0.0003	0.0003	0.0003
COL8A2	0.0003	0.0003	0.0003	0.0532	0.0003	0.0003	0.0687	0.0003	0.1209	0.1769	0.1199	0.0687	0.4165	0.0003	0.0003	0.0003	0.0003
UGT1A8	0.0514	0.0022	0.0003	0.0003	0.0003	0.0003	0.0003	0.0003	0.0003	0.0003	0.0003	0.0003	0.0003	0.0003	0.0003	0.0003	0.0003
UGT1A9	0.0514	0.0022	0.0003	0.0003	0.0003	0.0003	0.0003	0.0003	0.0003	0.0003	0.0003	0.0003	0.0003	0.0003	0.0003	0.0003	0.0003
COL16A1	0.0003	0.0003	0.0369	0.0167	0.0003	0.006	0.0049	0.0133	0.0051	0.0048	0.0134	0.0238	0.0003	0.1359	0.0003	0.1058	0.0003
TH	0.0003	0.0003	0.0535	0.0003	0.0003	0.0003	0.0003	0.0003	0.0003	0.0003	0.0003	0.0003	0.0003	0.0003	0.0003	0.0003	0.0003
ZC3H18	0.0003	0.0137	0.0401	0.0003	0.0003	0.0003	0.0003	0.0003	0.0003	0.0003	0.0003	0.0003	0.0003	0.0144	0.0535	0.0201	0.0446
LEPREL4	0.0003	0.0535	0.0003	0.0003	0.0003	1.755	0.0003	0.0003	0.0003	0.0003	0.1282	0.0395	0.3227	0.7015	0.3352	1.8802	1.0884
LAMC2	0.0536	0.0003	0.0003	0.0003	0.0003	0.0003	0.0003	0.0003	0.0003	0.0003	0.0003	0.0003	0.0003	0.0003	0.0003	0.0003	0.0003
MIOS	0.0003	0.0536	0.0003	0.0003	0.0003	0.0003	0.0003	0.0003	0.0003	0.0003	0.0003	0.0003	0.0003	0.0003	0.0003	0.0003	0.0003
SUPT5H	0.0335	0.0204	0.0003	0.0003	0.0003	0.0003	0.0003	0.0003	0.0003	0.0003	0.0003	0.0003	0.0003	0.0003	0.0003	0.0003	0.0003
SSU72	0.0537	0.0003	0.0003	0.0003	0.0003	0.0003	0.0003	0.0003	0.0003	0.0003	0.0003	0.0003	0.0003	0.0003	0.0003	0.0003	0.0003
GTDC2	0.0003	0.0003	0.0538	0.0003	0.0003	0.0003	0.0003	0.0003	0.0003	0.0003	0.0003	0.0003	0.0003	0.0003	0.0003	0.0003	0.0003
DLG2	0.0003	0.0539	0.0003	0.0003	0.0003	0.0003	0.0003	0.0003	0.0003	0.0003	0.0003	0.0003	0.0003	0.0003	0.0003	0.0003	0.0003
MTHFS	0.0539	0.0003	0.0003	0.0003	0.0003	0.0003	0.0003	0.0003	0.0003	0.0003	0.0003	0.0003	0.0003	0.0003	0.0003	0.0003	0.0003
CERS3	0.054	0.0003	0.0003	0.0003	0.0003	0.0003	0.0003	0.0003	0.0003	0.0003	0.0003	0.0003	0.0003	0.0003	0.0003	0.0003	0.0003
ABHD16A	0.0003	0.0541	0.0003	0.0003	0.0003	0.0003	0.0003	0.0003	0.0003	0.0003	0.0003	0.0003	0.0003	0.0003	0.0003	0.0003	0.0003
MON2	0.0304	0.0143	0.0003	0.0003	0.0102	0.0003	0.0003	0.0003	0.0003	0.0003	0.0003	0.0003	0.0003	0.0003	0.0003	0.0003	0.0003
BCKDK	0.0003	0.0003	0.0003	0.0003	0.0545	0.0003	0.0003	0.0003	0.0003	0.0003	0.0003	0.0003	0.0003	0.0003	0.0003	0.0003	0.0003
GET4	0.0546	0.0003	0.0003	0.0003	0.0003	0.0003	0.0003	0.0003	0.0003	0.0003	0.0003	0.0003	0.0003	0.0003	0.0003	0.0003	0.0003
PPP1R9A	0.0124	0.0045	0.0131	0.0077	0.0182	0.0241	0.0003	0.0073	0.0003	0.0003	0.0106	0.0003	0.0258	0.0323	0.015	0.035	0.0497
STX17	0.0003	0.0548	0.0003	0.0003	0.0003	0.0003	0.0003	0.0003	0.0003	0.0003	0.0003	0.0003	0.0003	0.0003	0.0003	0.0003	0.0003
SIX5	0.0324	0.0003	0.0003	0.0158	0.0073	0.0373	0.0177	0.0044	0.0003	0.0003	0.0003	0.0003	0.0003	0.0205	0.0221	0.0271	0.0003
ST20-MTHFS	0.0553	0.0003	0.0003	0.0003	0.0003	0.0003	0.0003	0.0003	0.0003	0.0003	0.0003	0.0003	0.0003	0.0003	0.0003	0.0003	0.0003
TDRD3	0.0003	0.0003	0.0003	0.0003	0.0553	0.0003	0.0003	0.0003	0.0003	0.0003	0.0003	0.0003	0.0003	0.0003	0.0003	0.0003	0.0003
INPP4B	0.0003	0.0373	0.0184	0.0003	0.0003	0.0003	0.0003	0.0172	0.0003	0.0003	0.0003	0.0003	0.0003	0.0003	0.0003	0.0003	0.0003
ICAM1	0.0003	0.0003	0.0392	0.0003	0.0165	0.2011	0.0003	0.0308	0.1074	0.0383	0.0003	0.017	0.1277	0.3144	0.0944	0.0374	0.1978
FAM83A	0.0003	0.0555	0.0003	0.0003	0.0003	0.0003	0.0003	0.0003	0.0003	0.0003	0.0003	0.0003	0.0003	0.0003	0.0003	0.0003	0.0003
MAFG	0.0555	0.0003	0.0003	0.0003	0.0003	0.0003	0.0003	0.0003	0.0003	0.0003	0.0003	0.0003	0.0003	0.0003	0.0003	0.0003	0.0003
UGT1A10	0.0535	0.0023	0.0003	0.0003	0.0003	0.0003	0.0003	0.0003	0.0003	0.0003	0.0003	0.0003	0.0003	0.0003	0.0003	0.0003	0.0003
FBXL8	0.0003	0.0555	0.0003	0.0003	0.0003	0.0766	0.0003	0.0003	0.0003	0.0003	0.0003	0.0003	0.0003	0.0003	0.0003	0.0289	0.0003
SIPA1L3	0.0003	0.0424	0.0003	0.0138	0.0003	0.0003	0.0003	0.0003	0.0003	0.0003	0.0003	0.0003	0.0003	0.0003	0.0003	0.0003	0.0003
ACAD8	0.0563	0.0003	0.0003	0.0003	0.0003	0.0003	0.0003	0.0003	0.0003	0.0003	0.0003	0.0003	0.0003	0.0003	0.0826	0.0003	0.0003
EXOC5	0.0003	0.0566	0.0003	0.0003	0.0003	0.0003	0.0003	0.0003	0.0003	0.0003	0.0003	0.0003	0.0003	0.0003	0.0003	0.0003	0.0003
CROCC	0.0372	0.0199	0.0003	0.0003	0.0003	0.0003	0.0069	0.0003	0.0003	0.0003	0.0003	0.0003	0.0003	0.0003	0.0003	0.0003	0.0161
NFASC	0.0003	0.0003	0.0568	0.0003	0.0003	0.0003	0.0345	0.0003	0.0003	0.0003	0.0003	0.0003	0.0003	0.0003	0.0003	0.0003	0.0003
EMC3	0.0003	0.0003	0.0003	0.0003	0.0568	0.0003	0.0003	0.0003	0.0003	0.0003	0.0003	0.0003	0.0003	0.2006	0.0676	0.0003	0.0003
MYO5A	0.0003	0.0003	0.0232	0.0003	0.0339	0.0192	0.0057	0.0299	0.0003	0.0154	0.0614	0.0239	0.0537	0.0573	0.0127	0.0271	0.0003
ARMC8	0.0427	0.0145	0.0003	0.0003	0.0003	0.0003	0.0003	0.0003	0.0003	0.0003	0.0003	0.0003	0.0003	0.0003	0.0003	0.0003	0.0003
PTPN1	0.0003	0.0003	0.057	0.0003	0.0003	0.0003	0.0003	0.0559	0.0003	0.0003	0.0003	0.0003	0.0958	0.0361	0.0542	0.0003	0.1191
MYPN	0.0003	0.0003	0.0268	0.0064	0.0245	0.0003	0.011	0.0003	0.0003	0.0003	0.0003	0.0003	0.0003	0.0003	0.0269	0.0003	0.0003
RNF31	0.0003	0.0193	0.034	0.0044	0.0003	0.076	0.0003	0.0003	0.0003	0.0003	0.0003	0.0003	0.0003	0.0003	0.0003	0.0003	0.0003
GPLD1	0.0003	0.0339	0.0003	0.0236	0.0003	0.0003	0.0003	0.0003	0.0003	0.0003	0.0003	0.0003	0.0003	0.0003	0.0003	0.0003	0.0003
PCIF1	0.0003	0.0572	0.0003	0.0003	0.0003	0.0003	0.0003	0.0003	0.0003	0.0003	0.0003	0.0003	0.0003	0.0003	0.0003	0.0003	0.0003
GPR89B	0.0575	0.0003	0.0003	0.0003	0.0003	0.0003	0.0003	0.0003	0.0003	0.0003	0.0003	0.0003	0.0003	0.0003	0.0309	0.0003	0.0003
LAS1L	0.0576	0.0003	0.0003	0.0003	0.0003	0.0003	0.0003	0.0003	0.0003	0.0003	0.0003	0.0003	0.0003	0.0003	0.0003	0.0003	0.0003
SWAP70	0.0003	0.0003	0.0576	0.0003	0.0003	0.1918	0.0003	0.0003	0.0003	0.0003	0.0003	0.0003	0.0003	0.0003	0.0077	0.0003	0.0109
SYNE2	0.0058	0.0402	0.0124	0.0003	0.0003	0.0034	0.0013	0.0003	0.0011	0.0003	0.0003	0.0022	0.0003	0.0007	0.0128	0.0028	0.0042
PPAT	0.0003	0.0578	0.0003	0.0003	0.0003	0.0291	0.0003	0.0003	0.0003	0.0003	0.0003	0.0003	0.0003	0.0003	0.0003	0.0003	0.0003
GPAA1	0.0578	0.0003	0.0003	0.0003	0.0003	0.0003	0.0003	0.0003	0.0003	0.0003	0.0003	0.0003	0.0003	0.0003	0.0003	0.1676	0.0003
ZFYVE20	0.0003	0.0003	0.0003	0.0003	0.0582	0.0003	0.0003	0.0003	0.0003	0.0003	0.0003	0.0003	0.0003	0.0003	0.0003	0.0003	0.0003
RAB3B	0.0583	0.0003	0.0003	0.0003	0.0003	0.0003	0.0003	0.0003	0.0003	0.0003	0.0003	0.0003	0.0003	0.0003	0.0003	0.0003	0.0003
RAB3C	0.0583	0.0003	0.0003	0.0003	0.0003	0.0003	0.0003	0.0003	0.0003	0.0003	0.0003	0.0003	0.0003	0.0003	0.0003	0.0003	0.0003
NUP214	0.0096	0.0226	0.0003	0.0126	0.0144	0.0338	0.0054	0.0053	0.0003	0.0003	0.0003	0.0003	0.0003	0.014	0.0259	0.0135	0.0003
ALG3	0.0003	0.0583	0.0003	0.0003	0.0003	0.0003	0.0003	0.0003	0.0003	0.0003	0.0003	0.0003	0.0003	0.0428	0.6316	0.053	0.058
PPP2R2B	0.0003	0.0226	0.0003	0.0003	0.0361	0.0224	0.0003	0.0003	0.0003	0.0624	0.0003	0.0357	0.0003	0.0003	0.1084	0.0904	0.2095
NUDCD3	0.0003	0.0003	0.0586	0.0003	0.0003	0.0003	0.0003	0.0003	0.0003	0.0003	0.0003	0.0003	0.0003	0.0003	0.0003	0.0003	0.0003
KCTD21	0.0003	0.0003	0.0003	0.0258	0.0331	0.0275	0.0003	0.0003	0.0003	0.0003	0.0003	0.0214	0.0003	0.0486	0.0252	0.0431	0.0478
TBCE	0.0003	0.0589	0.0003	0.0003	0.0003	0.0003	0.0003	0.0003	0.0003	0.0003	0.0003	0.0003	0.0003	0.0003	0.0003	0.0003	0.0003
GPR89A	0.0589	0.0003	0.0003	0.0003	0.0003	0.0003	0.0003	0.0003	0.0003	0.0003	0.0003	0.0003	0.0003	0.0003	0.0316	0.0003	0.0003
AIM1L	0.0526	0.0067	0.0003	0.0003	0.0003	0.0003	0.0003	0.0003	0.0003	0.0003	0.0003	0.0003	0.0003	0.0003	0.0003	0.0003	0.0003
THOC2	0.0247	0.0269	0.0003	0.0003	0.0082	0.0066	0.0003	0.0003	0.0003	0.0003	0.0003	0.0003	0.0003	0.0003	0.0072	0.0131	0.0327
NUP210L	0.0003	0.0003	0.0593	0.0003	0.0003	0.0003	0.109	0.0003	0.0003	0.0003	0.0003	0.0003	0.0003	0.0003	0.0003	0.0003	0.0003
SLC9A6	0.0183	0.0003	0.0003	0.0208	0.0209	0.0003	0.0205	0.015	0.0003	0.0003	0.0091	0.0254	0.04	0.0377	0.0313	0.0328	0.0003
CDC73	0.0003	0.0003	0.0597	0.0003	0.0003	0.0003	0.0003	0.0003	0.0003	0.0003	0.0003	0.0003	0.0003	0.0003	0.0003	0.0003	0.0003
DDX58	0.0253	0.0307	0.0003	0.0003	0.0044	0.0283	0.0003	0.0003	0.0003	0.0003	0.0187	0.0003	0.0003	0.0003	0.0003	0.0003	0.0003
GBA	0.0599	0.0003	0.0003	0.0003	0.0003	0.0003	0.0003	0.0003	0.0003	0.0003	0.0003	0.0003	0.0003	0.0003	0.0003	0.0003	0.0003
GPHN	0.0378	0.0227	0.0003	0.0003	0.0003	0.0003	0.0003	0.0003	0.0003	0.0003	0.0003	0.0003	0.0003	0.0003	0.0003	0.0003	0.0003
FMNL1	0.0604	0.0003	0.0003	0.0003	0.0003	0.0648	0.0003	0.0003	0.0003	0.0003	0.0003	0.0003	0.0003	0.0307	0.0539	0.0298	0.097
UGT1A1	0.0584	0.0025	0.0003	0.0003	0.0003	0.0003	0.0003	0.0003	0.0003	0.0003	0.0003	0.0003	0.0003	0.0003	0.0003	0.0003	0.0003
JMJD7-PLA2G4B	0.0313	0.0296	0.0003	0.0003	0.0003	0.0003	0.0003	0.0003	0.0003	0.0003	0.0003	0.0003	0.0003	0.0003	0.0106	0.0076	0.0003
USP13	0.0003	0.0133	0.0376	0.0103	0.0003	0.0504	0.0164	0.0221	0.0141	0.0003	0.0003	0.0003	0.0003	0.0003	0.0093	0.0003	0.0244
BPIFB1	0.0003	0.0608	0.0003	0.0003	0.0003	0.0003	0.0003	0.0003	0.0003	0.0003	0.0003	0.0003	0.0003	0.0003	0.0003	0.0003	0.0003
NAALADL2	0.0003	0.0612	0.0003	0.0003	0.0003	0.0003	0.0003	0.0003	0.0003	0.0003	0.0003	0.0003	0.0003	0.0003	0.0003	0.0003	0.0003
RPRD1A	0.0003	0.0613	0.0003	0.0003	0.0003	0.0003	0.0003	0.0003	0.0003	0.0003	0.0003	0.0003	0.0003	0.0003	0.0003	0.0003	0.0003
SEC24A	0.0003	0.0247	0.0279	0.0095	0.0003	0.0718	0.0178	0.016	0.0003	0.0255	0.0003	0.0003	0.0003	0.0429	0.0505	0.0544	0.069
MIPEP	0.0616	0.0003	0.0003	0.0003	0.0003	0.0003	0.0003	0.0003	0.0003	0.0003	0.0003	0.0003	0.0003	0.0003	0.0003	0.0003	0.0003
PMP2	0.0003	0.0003	0.0616	0.0003	0.0003	0.0003	0.0687	0.0325	0.0003	0.0003	0.0003	0.0003	0.0003	0.0003	0.0236	0.0003	0.0003
SETD7	0.0003	0.0003	0.062	0.0003	0.0003	0.0003	0.0003	0.0003	0.0003	0.0003	0.0003	0.0003	0.0003	0.0003	0.0003	0.0003	0.0003
MTA3	0.0621	0.0003	0.0003	0.0003	0.0003	0.0003	0.0003	0.0003	0.0003	0.0003	0.0003	0.0003	0.0003	0.0377	0.0434	0.0003	0.0003
MZT2A	0.0003	0.0286	0.0003	0.0003	0.0338	0.0003	0.0003	0.0003	0.0003	0.0003	0.0003	0.0003	0.0003	0.0003	0.0003	0.0003	0.0867
BRI3BP	0.0622	0.0003	0.0003	0.0003	0.0003	0.0003	0.0003	0.0003	0.0003	0.0003	0.0003	0.0003	0.0003	0.0003	0.0003	0.0003	0.0003
PPM1L	0.0003	0.0622	0.0003	0.0003	0.0003	0.0003	0.0003	0.0003	0.0003	0.0003	0.0003	0.0003	0.0003	0.0003	0.0003	0.0003	0.0003
GALK2	0.0003	0.0623	0.0003	0.0003	0.0003	0.0003	0.0003	0.0003	0.0003	0.0003	0.0003	0.0003	0.0003	0.0003	0.0003	0.0003	0.0003
TSNAXIP1	0.0003	0.0003	0.0003	0.0003	0.0624	0.0003	0.0003	0.0003	0.024	0.0003	0.0003	0.0003	0.0003	0.0003	0.0003	0.0177	0.0003
CPM	0.0003	0.0003	0.0624	0.0003	0.0003	0.0774	0.009	0.0003	0.0003	0.0003	0.0003	0.0003	0.0003	0.0003	0.0003	0.0003	0.0003
LPCAT3	0.0624	0.0003	0.0003	0.0003	0.0003	0.0003	0.0003	0.0003	0.0003	0.0003	0.0003	0.0003	0.0003	0.0003	0.0003	0.2858	0.0003
CLPX	0.0625	0.0003	0.0003	0.0003	0.0003	0.0003	0.0003	0.0003	0.0003	0.0003	0.0003	0.0003	0.0003	0.0003	1.8145	0.0003	0.0003
MPV17	0.0003	0.0003	0.0626	0.0003	0.0003	0.0003	0.0003	0.0003	0.0003	0.0003	0.0003	0.0003	0.0003	0.0003	0.0003	0.0003	0.0003
ATP5G2	0.0003	0.0003	0.0627	0.0003	0.0003	0.0003	0.0003	0.0003	0.0003	0.0003	0.0003	0.0003	0.0003	0.0003	0.0003	0.0003	0.0003
SULT1A2	0.0003	0.0298	0.0003	0.0129	0.021	0.0003	0.0003	0.0003	0.0003	0.0003	0.0003	0.0003	0.1492	0.084	0.0121	0.0003	0.0003
WDR44	0.0634	0.0003	0.0003	0.0003	0.0003	0.0003	0.0003	0.0003	0.0003	0.0003	0.0003	0.0003	0.0003	0.0003	0.0003	0.0003	0.0003
PHLDA1	0.0636	0.0003	0.0003	0.0003	0.0003	0.0003	0.0003	0.0003	0.0003	0.0003	0.0003	0.0003	0.0003	0.0003	0.0003	0.0003	0.0003
VAMP1	0.0003	0.0003	0.0638	0.0003	0.0003	0.0003	0.0418	0.0003	0.0003	0.0003	0.0003	0.0003	0.0003	0.0003	0.0003	0.0003	0.0003
OSGEP	0.0003	0.064	0.0003	0.0003	0.0003	0.0003	0.0003	0.0003	0.0003	0.0003	0.0003	0.0003	0.0003	0.0003	0.0003	0.0634	0.137
BYSL	0.0303	0.0341	0.0003	0.0003	0.0003	0.0003	0.0003	0.0003	0.0003	0.0003	0.0003	0.0132	0.0003	0.0003	0.0003	0.0003	0.0385
BCS1L	0.0003	0.0003	0.0642	0.0003	0.0003	0.0003	0.0003	0.0003	0.0254	0.0003	0.0003	0.0003	0.0003	0.0003	0.1055	0.0003	0.0003
SNED1	0.0003	0.0643	0.0003	0.0003	0.0003	0.0003	0.0003	0.0003	0.0003	0.0003	0.0003	0.0142	0.0003	0.0003	0.0003	0.0003	0.0003
NARFL	0.0645	0.0003	0.0003	0.0003	0.0003	0.0003	0.0003	0.0003	0.0003	0.0003	0.0003	0.0003	0.0003	0.0003	0.0003	0.0003	0.0003
CDH2	0.0003	0.0003	0.0003	0.0003	0.0648	0.0003	0.0003	0.1263	0.0003	0.0003	0.0003	0.0003	0.0003	0.0003	0.0003	0.0003	0.0003
ATP6AP2	0.0649	0.0003	0.0003	0.0003	0.0003	0.0003	0.0003	0.0003	0.0003	0.0003	0.0003	0.0003	0.0003	0.0003	0.0003	0.0003	0.0003
GOLGB1	0.0649	0.0003	0.0003	0.0003	0.0003	0.0003	0.0003	0.0068	0.0003	0.0003	0.0003	0.0003	0.0003	0.0003	0.0003	0.0003	0.0003
RHD	0.0003	0.0003	0.0003	0.0003	0.0649	0.0003	0.1257	0.0291	0.2664	0.0003	0.1858	0.3232	0.1136	0.0003	0.1176	0.0003	0.0003
ZC3H7B	0.0651	0.0003	0.0003	0.0003	0.0003	0.0003	0.0003	0.0003	0.0003	0.0003	0.0003	0.0003	0.0003	0.0003	0.0003	0.0003	0.0003
MROH1	0.0003	0.0155	0.0462	0.0017	0.0026	0.0003	0.0013	0.0026	0.0003	0.0003	0.0003	0.0003	0.0003	0.0003	0.0003	0.0003	0.0003
STRIP1	0.0003	0.0003	0.0003	0.0003	0.0651	0.0003	0.0003	0.03	0.0003	0.0003	0.0003	0.0003	0.0003	0.0003	0.0003	0.0003	0.0003
NELFB	0.0003	0.0289	0.0003	0.0003	0.0365	0.0003	0.0003	0.0003	0.0253	0.0003	0.0003	0.0003	0.0003	0.0003	0.0293	0.0391	0.0761
NFKB2	0.0485	0.0003	0.017	0.0003	0.0003	0.0003	0.0003	0.0003	0.0003	0.0003	0.0003	0.0003	0.0003	0.0003	0.0003	0.0003	0.0003
GATAD2B	0.0654	0.0003	0.0003	0.0003	0.0003	0.0003	0.0003	0.0003	0.0003	0.0003	0.0003	0.0003	0.0003	0.0003	0.0003	0.0003	0.0003
WNT10A	0.0654	0.0003	0.0003	0.0003	0.0003	0.0003	0.0003	0.0003	0.0003	0.0003	0.0003	0.0003	0.0003	0.0003	0.0003	0.0003	0.0003
CADPS	0.0003	0.0003	0.0654	0.0003	0.0003	0.5831	0.065	0.0545	0.0003	0.0003	0.1369	0.0003	0.0003	0.1918	0.1194	0.0003	0.4901
COG7	0.0658	0.0003	0.0003	0.0003	0.0003	0.0003	0.0003	0.0003	0.0003	0.0003	0.0003	0.0003	0.0003	0.0003	0.0003	0.0003	0.0859
CCDC93	0.0399	0.0264	0.0003	0.0003	0.0003	0.0003	0.0003	0.0003	0.0003	0.0003	0.0003	0.0003	0.0003	0.0003	0.0003	0.0003	0.0003
CUX1	0.0571	0.0003	0.0093	0.0003	0.0003	0.0003	0.0003	0.0003	0.0003	0.0003	0.0003	0.0003	0.0003	0.0003	0.0003	0.1275	0.0003
SCAF4	0.0289	0.0087	0.0292	0.0003	0.0003	0.0003	0.0003	0.0003	0.0003	0.0003	0.0003	0.0003	0.0003	0.0003	0.0057	0.0073	0.021
ATP6V0A1	0.0662	0.0003	0.0003	0.0003	0.0003	0.0003	0.0147	0.007	0.0003	0.0003	0.0003	0.0335	0.0003	0.0274	0.0003	0.0946	0.0003
PRKAB2	0.0003	0.0003	0.0252	0.0003	0.0414	0.0003	0.0003	0.0003	0.0003	0.0003	0.0003	0.0003	0.0003	0.0003	0.1305	0.0702	0.0003
ICAM3	0.0664	0.0003	0.0003	0.0003	0.0003	0.0003	0.0003	0.0003	0.0003	0.0003	0.0003	0.0003	0.0003	0.0003	0.0003	0.0003	0.0003
L1CAM	0.0003	0.0003	0.0664	0.0003	0.0003	0.0003	0.1924	0.0348	0.0003	0.0358	0.0528	0.0147	0.0003	0.0003	0.0109	0.0003	0.0003
CCDC132	0.0003	0.0003	0.0665	0.0003	0.0003	0.0003	0.0003	0.0003	0.0003	0.0003	0.0003	0.0003	0.0003	0.0003	0.0003	0.0003	0.0003
SULT1A1	0.0003	0.0314	0.0003	0.0136	0.0221	0.0365	0.0003	0.0003	0.0003	0.0003	0.0003	0.0003	0.2101	0.091	0.0127	0.0003	0.0003
WLS	0.0491	0.0178	0.0003	0.0003	0.0003	0.0003	0.0069	0.0003	0.0003	0.0003	0.0003	0.0204	0.0003	0.0003	0.0003	0.0003	0.0003
LOC101060704	0.0003	0.0003	0.0003	0.0667	0.0003	0.0003	0.0003	0.0003	0.0003	0.0003	0.0003	0.0003	0.0003	0.0003	0.0003	0.0003	0.0003
RFTN1	0.0003	0.0003	0.0003	0.0003	0.0667	0.0003	0.0003	0.0003	0.0003	0.0003	0.0003	0.0003	0.0003	0.0003	0.0375	0.0003	0.0003
NEU1	0.0668	0.0003	0.0003	0.0003	0.0003	0.0003	0.0003	0.0003	0.0003	0.0003	0.0003	0.0003	0.0003	0.0003	0.0003	0.0003	0.0003
HBS1L	0.028	0.0003	0.0003	0.0003	0.0396	0.0003	0.0003	0.0003	0.0003	0.0003	0.0003	0.0003	0.0003	0.0003	0.0003	0.0003	0.0003
PLSCR4	0.0003	0.0003	0.0674	0.0003	0.0003	0.0003	0.0003	0.0003	0.0003	0.0003	0.0003	0.0003	0.0003	0.0003	0.0003	0.0003	0.0003
TBC1D2B	0.0003	0.0003	0.0342	0.0335	0.0003	0.0672	0.0003	0.0003	0.0003	0.0003	0.0003	0.0003	0.0003	0.303	0.1149	0.1221	0.1531
ARIH2	0.0003	0.0003	0.0675	0.0003	0.0003	0.0003	0.0003	0.0003	0.0003	0.0003	0.0003	0.0003	0.0003	0.0003	0.0003	0.0003	0.0003
NUP153	0.0333	0.0346	0.0003	0.0003	0.0003	0.0003	0.0003	0.0003	0.0003	0.0003	0.0003	0.0003	0.0003	0.0003	0.0003	0.0003	0.0003
BCR	0.0543	0.0138	0.0003	0.0003	0.0003	0.0003	0.0003	0.0003	0.0003	0.0003	0.0003	0.0003	0.0003	0.0003	0.0003	0.0003	0.0003
MAFK	0.0678	0.0003	0.0003	0.0003	0.0003	0.0003	0.0003	0.0003	0.0003	0.0003	0.0003	0.0003	0.0003	0.0003	0.0003	0.0003	0.0003
MYCBP	0.0678	0.0003	0.0003	0.0003	0.0003	0.0003	0.0003	0.0003	0.0003	0.0003	0.0003	0.0003	0.0003	0.0003	0.0003	0.0003	0.0003
CLCA2	0.0375	0.0307	0.0003	0.0003	0.0003	0.0003	0.0003	0.0003	0.0003	0.0003	0.0003	0.0003	0.0003	0.0003	0.0003	0.0003	0.0003
MYH13	0.0003	0.0003	0.0429	0.0205	0.0052	0.0003	0.009	0.0033	3.2358	0.0003	0.0008	0.0093	6.552	0.0003	15.1828	7.7426	0.0003
ARHGAP29	0.0003	0.0681	0.0003	0.0003	0.0003	0.0003	0.0003	0.0003	0.0003	0.0003	0.0003	0.0003	0.0003	0.0003	0.0003	0.0003	0.0003
USP15	0.0681	0.0003	0.0003	0.0003	0.0003	0.0003	0.0003	0.0003	0.0003	0.0003	0.0003	0.0003	0.0003	0.0003	0.0003	0.0003	0.0003
ITGB5	0.0178	0.0003	0.0509	0.0003	0.0003	0.1482	0.0274	0.129	0.0198	0.0003	0.0003	0.0003	0.0003	0.0552	0.0934	0.3578	0.3985
ECHDC2	0.0003	0.0685	0.0003	0.0003	0.0003	0.0003	0.0003	0.0003	0.0003	0.0003	0.0003	0.0003	0.0003	0.0003	0.0003	0.0003	0.0003
EPM2A	0.0003	0.0003	0.0685	0.0003	0.0003	0.0003	0.0003	0.0003	0.0003	0.0003	0.0003	0.0003	0.0003	0.0003	0.0003	0.0003	0.0003
NOMO3	0.0477	0.0003	0.0055	0.0003	0.0159	0.0111	0.0003	0.0003	0.0003	0.0003	0.0003	0.0003	0.007	0.0149	0.0003	0.0302	0.0353
MRPS5	0.0686	0.0003	0.0003	0.0003	0.0003	0.0003	0.0003	0.0003	0.0003	0.0003	0.0003	0.0003	0.0003	0.0003	0.0003	0.0003	0.0003
NOMO2	0.0478	0.0003	0.0055	0.0003	0.0159	0.0111	0.0003	0.0003	0.0003	0.0003	0.0003	0.0003	0.007	0.0149	0.0003	0.0302	0.0353
STAT5B	0.0003	0.0003	0.0687	0.0003	0.0003	0.0003	0.0003	0.0003	0.0003	0.0003	0.0003	0.0003	0.0003	0.0003	0.0003	0.0003	0.0003
WASH1	0.0003	0.0003	0.0003	0.0003	0.0689	0.0003	0.0003	0.0003	0.0003	0.0003	0.0003	0.0003	0.0003	0.0003	0.0003	0.0003	0.0003
ANO8	0.0003	0.0003	0.069	0.0003	0.0003	0.0003	0.0003	0.0003	0.0003	0.0003	0.0003	0.0003	0.0003	0.0003	0.0003	0.0003	0.0003
PDK3	0.0003	0.0003	0.0691	0.0003	0.0003	0.0003	0.0003	0.1525	0.0003	0.0003	0.0003	0.0003	0.0003	0.0003	0.0003	0.0003	0.0003
PIFO	0.0003	0.0692	0.0003	0.0003	0.0003	0.0003	0.0003	0.0003	0.0003	0.0003	0.0003	0.0003	0.0003	0.0003	0.0003	0.0003	0.0003
TMEM30B	0.0003	0.0692	0.0003	0.0003	0.0003	0.0003	0.0003	0.0003	0.0003	0.0003	0.0003	0.0003	0.0003	0.0003	0.0003	0.0003	0.0003
ZG16B	0.0003	0.0692	0.0003	0.0003	0.0003	0.0003	0.0003	0.3306	0.0003	0.0003	0.0003	0.0003	0.0003	0.0003	0.0003	0.0003	0.0003
ATRIP	0.0694	0.0003	0.0003	0.0003	0.0003	0.0003	0.0003	0.0003	0.0003	0.0003	0.0003	0.0003	0.0003	0.0003	0.0003	0.0003	0.0003
CCNYL2	0.0003	0.0238	0.0196	0.0003	0.0266	0.0204	0.0059	0.0216	0.0003	0.0003	0.0003	0.0003	0.0003	0.0003	0.0003	0.0003	0.0003
NOMO1	0.0485	0.0003	0.0056	0.0003	0.0161	0.0113	0.0003	0.0003	0.0003	0.0003	0.0003	0.0003	0.0071	0.0152	0.0003	0.0307	0.0358
TMEM63A	0.0003	0.0597	0.0003	0.0103	0.0003	0.0003	0.0003	0.0003	0.0003	0.0003	0.0003	0.0003	0.0003	0.0003	0.0003	0.0003	0.0003
DAZAP2	0.0003	0.0698	0.0003	0.0003	0.0003	0.0003	0.0003	0.0003	0.0003	0.0003	0.0003	0.0003	0.0003	0.0003	0.0003	0.0003	0.0003
RAVER1	0.0462	0.0239	0.0003	0.0003	0.0003	0.0003	0.0003	0.0003	0.0003	0.0003	0.0003	0.0003	0.0003	0.0003	0.0003	0.0003	0.0003
CASP1	0.07	0.0003	0.0003	0.0003	0.0003	0.0003	0.0003	0.0003	0.0003	0.0003	0.0003	0.0003	0.0003	0.0003	0.0003	0.0003	0.0003
DEF6	0.07	0.0003	0.0003	0.0003	0.0003	0.0003	0.0003	0.0003	0.0003	0.0003	0.0003	0.0003	0.0003	0.0003	0.0003	0.0003	0.0003
GATC	0.07	0.0003	0.0003	0.0003	0.0003	0.0003	0.0003	0.0003	0.0003	0.0003	0.0003	0.0003	0.0003	0.0003	0.0003	0.0003	0.0003
ITPR3	0.0682	0.0032	0.0003	0.0003	0.0003	0.0003	0.0003	0.0003	0.0003	0.0003	0.0003	0.0003	0.0003	0.0003	0.0003	0.0003	0.0003
MAP2K3	0.0362	0.0003	0.0353	0.0003	0.0003	0.0003	0.0003	0.2424	0.0003	0.0003	0.0003	0.0934	0.0003	0.0003	0.0003	0.0003	0.0003
WIPF2	0.0714	0.0003	0.0003	0.0003	0.0003	0.0003	0.0003	0.0003	0.0003	0.0003	0.0003	0.0003	0.0003	0.0003	0.0003	0.0003	0.0003
MAPRE3	0.0715	0.0003	0.0003	0.0003	0.0003	0.0003	0.0077	0.0003	0.0003	0.0003	0.0003	0.0003	0.0003	0.0003	0.0003	0.0003	0.0003
HDHD1	0.0003	0.0715	0.0003	0.0003	0.0003	0.0003	0.1427	0.0003	0.0003	0.0003	0.0003	0.0003	0.0003	0.0003	0.0003	0.0003	0.0003
GNE	0.0718	0.0003	0.0003	0.0003	0.0003	0.0003	0.0003	0.0003	0.0003	0.0003	0.0003	0.0003	0.0003	0.0003	0.0003	0.0003	0.0003
MFI2	0.0003	0.0003	0.0718	0.0003	0.0003	0.0003	0.0003	0.0003	0.0003	0.0003	0.0003	0.0003	0.0003	0.0003	0.0003	0.0003	0.0003
ASPSCR1	0.0718	0.0003	0.0003	0.0003	0.0003	0.0003	0.0003	0.0003	0.0003	0.0003	0.0003	0.0003	0.0003	0.0003	0.0003	0.0611	0.0003
HPGDS	0.0003	0.0003	0.0003	0.0003	0.0719	0.3688	0.0003	0.0003	0.0955	0.0003	0.0003	0.0003	0.0003	0.0003	0.0003	0.113	0.2776
LYAR	0.072	0.0003	0.0003	0.0003	0.0003	0.0003	0.0003	0.0003	0.0003	0.0003	0.0003	0.0003	0.0003	0.0003	0.0003	0.0003	0.0003
CCNY	0.0003	0.0247	0.0203	0.0003	0.0276	0.0211	0.0061	0.0224	0.0003	0.0003	0.0003	0.0003	0.0003	0.0003	0.0003	0.0003	0.0003
STRN	0.0199	0.0524	0.0003	0.0003	0.0003	0.0003	0.0003	0.0003	0.0003	0.0003	0.0003	0.0003	0.0003	0.0003	0.0003	0.0003	0.1238
LAMB4	0.0003	0.0003	0.0369	0.0114	0.0245	0.0003	0.0153	0.0079	0.0003	0.0003	0.0003	0.0093	0.0003	0.0003	0.0003	0.0003	0.0003
RNF213	0.0618	0.0108	0.0003	0.0003	0.0003	0.0138	0.0003	0.0003	0.0003	0.0003	0.0188	0.0003	0.0309	0.0003	0.0015	0.0655	0.1777
MRPL28	0.0003	0.0003	0.0724	0.0003	0.0003	0.0003	0.0003	0.0003	0.0003	0.0003	0.0003	0.0003	0.0003	0.0003	0.0621	0.0003	0.0003
GTF2F2	0.0003	0.0003	0.0003	0.0003	0.0724	0.112	0.0003	0.0003	0.0003	0.0003	0.0003	0.0003	0.0003	0.0003	0.0652	0.0894	0.1218
TM9SF4	0.0725	0.0003	0.0003	0.0003	0.0003	0.112	0.0003	0.0003	0.0003	0.0003	0.0003	0.0003	0.0003	0.0296	0.0003	0.0003	0.0003
LEMD3	0.0003	0.0003	0.0725	0.0003	0.0003	0.0309	0.0198	0.0282	0.0003	0.0003	0.16	0.307	0.0244	0.0003	0.0583	0.1449	0.0459
CD2BP2	0.0726	0.0003	0.0003	0.0003	0.0003	0.0003	0.0003	0.0003	0.0003	0.0003	0.0003	0.0003	0.0003	0.0003	0.0003	0.0003	0.0003
OPHN1	0.0003	0.0003	0.0726	0.0003	0.0003	0.0003	0.0158	0.0105	0.0003	0.0003	0.0003	0.0025	0.0003	0.0003	0.0003	0.0003	0.0003
RABEP1	0.0003	0.0003	0.0729	0.0003	0.0003	0.0003	0.0003	0.0003	0.0003	0.0003	0.0003	0.0003	0.0003	0.0003	0.0003	0.0003	0.0003
LOC377711	0.0003	0.0049	0.063	0.0023	0.0036	0.0003	0.0018	0.0035	0.0003	0.0003	0.0003	0.0003	0.0003	0.0003	0.0003	0.0003	0.0003
CD97	0.0003	0.0003	0.0532	0.0003	0.02	0.0003	0.0003	0.0257	0.0003	0.0003	0.0003	0.0003	0.0003	0.0003	0.6042	0.0003	0.0123
RRAGC	0.0003	0.0285	0.0003	0.0217	0.0235	0.0632	0.0003	0.0003	0.0003	0.0003	0.0003	0.0225	0.0335	0.0412	0.0003	0.0439	0.0347
LSG1	0.0734	0.0003	0.0003	0.0003	0.0003	0.0003	0.0003	0.0003	0.0003	0.0003	0.0003	0.0003	0.0003	0.0003	0.0003	0.0003	0.0003
TRAFD1	0.0738	0.0003	0.0003	0.0003	0.0003	0.0003	0.0003	0.0003	0.0003	0.0003	0.0003	0.5405	0.0003	0.0003	0.0003	0.0003	0.0003
ENPP7	0.0003	0.0003	0.0739	0.0003	0.0003	0.0003	0.0003	0.0003	0.0003	0.0003	0.0003	0.0003	0.0003	0.0003	0.0003	0.0003	0.0003
ELOVL1	0.074	0.0003	0.0003	0.0003	0.0003	0.0003	0.0003	0.0003	0.0003	0.0003	0.0003	0.0003	0.0003	0.0003	0.0003	0.0003	0.0003
GNA15	0.0003	0.074	0.0003	0.0003	0.0003	0.0003	0.0003	0.0003	0.0003	0.0003	0.0003	0.0003	0.0003	0.0003	0.0003	0.0003	0.0003
MTM1	0.0003	0.0003	0.0268	0.0003	0.0477	0.0003	0.0003	0.0457	0.0003	0.0003	0.0003	0.0003	0.0003	0.0003	0.0003	0.0003	0.0003
OGT	0.0743	0.0003	0.0003	0.0003	0.0003	0.0434	0.0003	0.0003	0.0003	0.0003	0.0003	0.0003	0.0003	0.0003	0.0003	0.0003	0.0003
GPR89C	0.0744	0.0003	0.0003	0.0003	0.0003	0.0003	0.0003	0.0003	0.0003	0.0003	0.0003	0.0003	0.0003	0.0003	0.04	0.0003	0.0003
TCEB1	0.0748	0.0003	0.0003	0.0003	0.0003	0.0003	0.0003	0.0003	0.0003	0.0003	0.0003	0.0003	0.0003	0.0003	0.0003	0.0003	0.0003
RRAGD	0.0003	0.0292	0.0003	0.0222	0.024	0.0647	0.0003	0.0003	0.0003	0.0003	0.0003	0.023	0.0343	0.0421	0.0003	0.045	0.0355
ADA	0.0003	0.031	0.0441	0.0003	0.0003	0.2344	0.0003	0.015	0.0922	0.0003	0.0003	0.0003	0.1214	0.1727	0.0003	0.1567	0.0003
MRPS22	0.0003	0.036	0.0003	0.0003	0.0392	0.0003	0.0003	0.0003	0.0003	0.0003	0.0003	0.0003	0.0003	0.0003	0.0003	0.0003	0.0003
SLC1A3	0.0003	0.075	0.0003	0.0003	0.0003	0.0003	0.0003	0.0003	0.0003	0.0003	0.0003	0.0003	0.0003	0.0003	0.0003	0.0003	0.0003
RBM5	0.0561	0.0194	0.0003	0.0003	0.0003	0.0003	0.0003	0.0003	0.0003	0.0003	0.0003	0.0003	0.0003	0.0003	0.0003	0.0003	0.0003
TPRKB	0.0003	0.0752	0.0003	0.0003	0.0003	0.0003	0.0003	0.0003	0.0003	0.0003	0.0003	0.0003	0.0003	0.0003	0.0003	0.0003	0.0003
FAM114A2	0.0003	0.0003	0.0269	0.0003	0.0487	0.0003	0.0003	0.0003	0.0003	0.0003	0.0003	0.0003	0.0003	0.0003	0.0003	0.0003	0.0003
EXT1	0.0003	0.0621	0.0003	0.0135	0.0003	0.0003	0.0003	0.0003	0.0003	0.0003	0.0242	0.0003	0.0003	0.0003	0.0003	0.0003	0.0003
LOC101060626	0.0003	0.0003	0.0588	0.0003	0.0172	0.0003	0.0003	0.0003	0.0003	0.0003	0.0003	0.0003	0.0003	0.0003	0.0003	0.0003	0.0003
RRP1	0.0758	0.0003	0.0003	0.0003	0.0003	0.0003	0.0003	0.0003	0.0003	0.0003	0.0003	0.0003	0.0003	0.0003	0.0003	0.0003	0.0003
YIF1B	0.0758	0.0003	0.0003	0.0003	0.0003	0.0003	0.0003	0.0003	0.0003	0.0003	0.0003	0.0003	0.0003	0.0003	0.0003	0.0003	0.0003
C10orf118	0.076	0.0003	0.0003	0.0003	0.0003	0.0003	0.0003	0.0003	0.0003	0.0003	0.0003	0.0003	0.0003	0.0003	0.0003	0.0003	0.0003
PPP2R5B	0.0003	0.0003	0.0427	0.0003	0.0339	0.0003	0.0003	0.0003	0.0003	0.0003	0.0003	0.0003	0.0003	0.0003	0.0003	0.0003	0.0003
DAB2	0.0003	0.0139	0.0166	0.0003	0.0465	0.4529	0.0003	0.0375	0.1167	0.0003	0.0003	0.0237	0.1215	0.4981	0.0796	0.5111	0.2066
2021-03-01	0.0003	0.0768	0.0003	0.0003	0.0003	0.1679	0.0003	0.0003	0.0003	0.0003	0.0003	0.0459	0.0873	0.0592	0.0003	0.0003	0.0003
BRIX1	0.0003	0.0769	0.0003	0.0003	0.0003	0.0003	0.0003	0.0003	0.0003	0.0003	0.0003	0.0003	0.0003	0.0003	0.0003	0.0003	0.0003
CDH3	0.0401	0.0112	0.0262	0.0003	0.0003	0.0003	0.0003	0.0003	0.0003	0.0003	0.0003	0.0003	0.0003	0.0003	0.0003	0.0003	0.0003
RDH11	0.0003	0.0769	0.0003	0.0003	0.0003	0.0003	0.0635	0.0003	0.0003	0.0003	0.1536	0.0742	0.0003	0.0733	0.0003	0.0003	0.1771
CC2D1B	0.0003	0.0639	0.0137	0.0003	0.0003	0.0003	0.0003	0.0003	0.0003	0.0003	0.0003	0.0003	0.0003	0.0003	0.0003	0.0003	0.0003
ABAT	0.0003	0.0393	0.0383	0.0003	0.0003	0.0003	0.0825	0.0003	0.0003	0.0003	0.0003	0.0003	0.0003	0.0003	0.0003	0.0003	0.0003
LOC100653071	0.0003	0.0773	0.0003	0.0003	0.0003	0.3966	0.0003	0.0003	0.0003	0.0003	0.0003	0.0003	0.0003	0.0003	0.0003	0.5301	0.3224
SMARCA5	0.0778	0.0003	0.0003	0.0003	0.0003	0.0003	0.0053	0.0003	0.0003	0.0003	0.0003	0.0017	0.0003	0.0003	0.0003	0.0052	0.0055
KIAA1191	0.0003	0.0003	0.0003	0.0003	0.078	0.0003	0.0003	0.0003	0.0003	0.0003	0.0003	0.0003	0.0003	0.0003	0.0003	0.0003	0.0003
LOXL3	0.0003	0.0003	0.0003	0.0278	0.0505	0.0003	0.0168	0.0003	0.0003	0.0003	0.0003	0.0003	0.0003	0.0003	0.0003	0.0003	0.0003
DCUN1D1	0.0003	0.0781	0.0003	0.0003	0.0003	0.0003	0.0003	0.0003	0.0003	0.0003	0.0003	0.0003	0.0003	0.0003	0.0003	0.0003	0.0003
SLC12A7	0.0781	0.0003	0.0003	0.0003	0.0003	0.0003	0.0003	0.0003	0.0003	0.0003	0.0003	0.0003	0.0003	0.0003	0.0003	0.0003	0.0003
IKBKB	0.0003	0.0781	0.0003	0.0003	0.0003	0.0003	0.0003	0.0003	0.0003	0.0003	0.0243	0.0003	0.0003	0.0003	0.0003	0.0003	0.0003
UAP1	0.0003	0.0441	0.0003	0.0003	0.0343	0.02	0.067	0.0003	0.0003	0.0003	0.0003	0.0003	0.0003	0.0856	0.0003	0.0282	0.0003
PDP1	0.0003	0.0159	0.0003	0.0625	0.0003	0.2324	0.0003	0.0003	0.0003	0.0003	0.0003	0.0003	0.0003	0.0003	0.1017	0.3002	0.0003
MST1L	0.0003	0.0003	0.0326	0.0458	0.0003	0.0578	0.0203	0.0447	0.0155	0.5864	0.0306	0.0478	0.0124	0.0003	0.0416	0.0282	0.0299
PCDH1	0.0786	0.0003	0.0003	0.0003	0.0003	0.0003	0.0003	0.0003	0.0003	0.0003	0.0003	0.0003	0.0003	0.0003	0.0003	0.0003	0.0003
MAPT	0.0003	0.0003	0.0787	0.0003	0.0003	0.0003	0.0003	0.0003	0.0003	0.0003	0.0003	0.0003	0.0003	0.0003	0.0003	0.0003	0.0003
FUK	0.0169	0.0568	0.0003	0.0056	0.0003	0.0185	0.0149	0.0003	0.0003	0.0003	0.0003	0.0074	0.0003	0.0003	0.0168	0.0003	0.0003
AKT1	0.0788	0.0003	0.0003	0.0003	0.0003	0.1706	0.162	0.0003	0.0003	0.0003	0.0003	0.0003	0.0003	0.0003	0.0003	0.0003	0.0003
TMC4	0.079	0.0003	0.0003	0.0003	0.0003	0.0003	0.0003	0.0003	0.0003	0.0003	0.0003	0.0003	0.0003	0.0003	0.0003	0.0003	0.0003
RHCE	0.0003	0.0003	0.0003	0.0003	0.0791	0.0003	0.1532	0.0355	0.3247	0.0003	0.2265	0.3938	0.1385	0.0003	0.1434	0.0003	0.0003
SLC27A4	0.0383	0.0184	0.0003	0.0003	0.0231	0.0003	0.0003	0.0003	0.0003	0.0003	0.0427	0.0189	0.0003	0.0268	0.0274	0.0003	0.0003
RAB3GAP1	0.0583	0.0148	0.0003	0.0003	0.0072	0.0003	0.0003	0.0003	0.0003	0.0003	0.0003	0.0003	0.0003	0.0003	0.0003	0.0003	0.0003
PDXP	0.0003	0.0003	0.0003	0.0797	0.0003	0.0003	0.0003	0.6308	0.0003	0.0003	0.0003	0.0003	0.0003	0.0003	0.0003	0.0003	0.0003
FBXO2	0.0003	0.0003	0.0003	0.0798	0.0003	0.0003	0.0003	0.0003	0.0003	0.0003	0.0003	0.0003	0.0003	0.0003	0.0003	0.0003	0.0003
ZFR	0.0471	0.0003	0.0331	0.0003	0.0003	0.0003	0.0003	0.0003	0.0003	0.0003	0.0003	0.187	0.0003	0.0003	0.0003	0.0003	0.0383
COG3	0.0499	0.0304	0.0003	0.0003	0.0003	0.0003	0.0003	0.0003	0.0003	0.0003	0.0003	0.0003	0.0003	0.0003	0.0165	0.0654	0.0003
MZT2B	0.0003	0.0368	0.0003	0.0003	0.0435	0.0003	0.0003	0.0003	0.0003	0.0003	0.0003	0.0003	0.0003	0.0003	0.0003	0.0003	0.1115
LOC101060511	0.0003	0.0003	0.0305	0.0003	0.0501	0.0003	0.0003	0.0003	0.0003	0.0003	0.0003	0.0003	0.0003	0.0003	0.158	0.085	0.0003
SH3PXD2A	0.0202	0.0272	0.0003	0.0003	0.0336	0.0003	0.0003	0.0003	0.0003	0.0003	0.0003	0.0003	0.0003	0.0003	0.0003	0.0003	0.0003
ZNF806	0.0424	0.0385	0.0003	0.0003	0.0003	0.0003	0.0003	0.0003	0.0003	0.0003	0.0003	0.0003	0.0003	0.0003	0.0003	0.0003	0.0003
NUDT16L1	0.0003	0.0003	0.0368	0.0442	0.0003	0.0289	0.0399	0.0003	0.0003	0.0003	0.0003	0.0003	0.0003	0.0003	0.0003	0.0003	0.0003
CCNYL1	0.0003	0.0277	0.0227	0.0003	0.031	0.0237	0.0068	0.0251	0.0003	0.0003	0.0003	0.0003	0.0003	0.0003	0.0003	0.0003	0.0003
ENPP4	0.0003	0.0003	0.0809	0.0003	0.0003	0.0003	0.0003	0.0003	0.0003	0.0003	0.0003	0.0003	0.0003	0.0003	0.0003	0.0003	0.0003
PLEKHA1	0.0812	0.0003	0.0003	0.0003	0.0003	0.1868	0.0003	0.0003	0.0003	0.0003	0.0003	0.1073	0.0003	0.0003	0.0003	0.0003	0.0003
NMNAT1	0.0815	0.0003	0.0003	0.0003	0.0003	0.0003	0.0003	0.0003	0.0003	0.0003	0.0003	0.0003	0.0003	0.0003	0.0003	0.0003	0.0003
TOP2A	0.0725	0.0093	0.0003	0.0003	0.0003	0.0003	0.0003	0.0003	0.0003	0.0003	0.0003	0.0003	0.0003	0.0003	0.0003	0.0003	0.0003
ZSWIM5	0.0003	0.0815	0.0003	0.0003	0.0003	0.0003	0.0003	0.0003	0.0603	0.0003	0.0003	0.0003	0.2742	0.0003	0.0003	0.3601	0.0003
CLASP2	0.0003	0.0003	0.0725	0.0038	0.006	0.0059	0.0003	0.0003	0.0003	0.0003	0.0003	0.0003	0.0003	0.0003	0.0238	0.0003	0.0073
POLR2H	0.0003	0.0818	0.0003	0.0003	0.0003	0.0003	0.0003	0.0003	0.0003	0.0003	0.0003	0.0003	0.0003	0.0003	0.0003	0.0003	0.0003
NUMB	0.0819	0.0003	0.0003	0.0003	0.0003	0.0003	0.0003	0.0003	0.0003	0.0003	0.0003	0.0003	0.0003	0.0003	0.0003	0.0003	0.0003
CDK11A	0.0823	0.0003	0.0003	0.0003	0.0003	0.0003	0.0003	0.0003	0.0003	0.0003	0.0003	0.0003	0.0003	0.0003	0.0003	0.0003	0.0003
ALOX15	0.0829	0.0003	0.0003	0.0003	0.0003	0.0003	0.0003	0.0003	0.0003	0.0003	0.0003	0.0003	0.0003	0.0003	0.0003	0.0003	0.0003
CXADR	0.0003	0.0829	0.0003	0.0003	0.0003	0.0003	0.0003	0.0003	0.0003	0.0003	0.0003	0.0003	0.0003	0.0003	0.0003	0.0003	0.0003
BAG5	0.0003	0.0602	0.0003	0.0234	0.0003	0.0353	0.0003	0.0003	0.0003	0.0003	0.0003	0.0003	0.0003	0.0003	0.0003	0.0003	0.0003
LPCAT2	0.0834	0.0003	0.0003	0.0003	0.0003	0.0003	0.0003	0.0003	0.0003	0.0003	0.0003	0.0003	0.0003	0.0003	0.105	0.0003	0.0003
WDR37	0.0003	0.0485	0.0353	0.0003	0.0003	0.0003	0.0167	0.0003	0.0003	0.0003	0.1283	0.0295	0.0003	0.0337	0.0003	0.0003	0.0003
SDF4	0.0837	0.0003	0.0003	0.0003	0.0003	0.0003	0.0003	0.0003	0.0003	0.0003	0.0003	0.0003	0.0003	0.0003	0.0003	0.0003	0.0003
UGT1A6	0.0805	0.0035	0.0003	0.0003	0.0003	0.0003	0.0003	0.0003	0.0003	0.0003	0.0003	0.0003	0.0003	0.0003	0.0003	0.0003	0.0003
IPO4	0.0837	0.0003	0.0003	0.0003	0.0003	0.1076	0.0003	0.0003	0.0003	0.0003	0.0003	0.0003	0.0003	0.0003	0.0003	0.0003	0.0003
RRM2B	0.0003	0.0003	0.0838	0.0003	0.0003	0.0003	0.0003	0.0003	0.0003	0.0003	0.0003	0.0003	0.0003	0.0003	0.0936	0.0003	0.0003
PAAF1	0.0003	0.0839	0.0003	0.0003	0.0003	0.0003	0.0003	0.0003	0.0003	0.0003	0.0003	0.0003	0.0003	0.0003	0.0003	0.0003	0.0003
GCLM	0.0843	0.0003	0.0003	0.0003	0.0003	0.0003	0.0003	0.0003	0.0003	0.0003	0.0003	0.0003	0.0003	0.0003	0.0003	0.0003	0.0003
SCN7A	0.0003	0.0003	0.0843	0.0003	0.0003	0.0003	0.0285	0.0003	0.0003	0.0718	0.0003	0.0003	0.0003	0.0003	0.0483	0.0003	0.0003
ZBTB7A	0.0846	0.0003	0.0003	0.0003	0.0003	0.0003	0.0003	0.0003	0.0003	0.0003	0.0003	0.0003	0.0003	0.0003	0.0003	0.0003	0.0003
IFIT5	0.0003	0.0003	0.0616	0.0003	0.0239	0.0003	0.0003	0.0003	0.0003	0.0003	0.0003	0.0003	0.0003	0.0003	0.0003	0.0003	0.0003
FAP	0.0852	0.0003	0.0003	0.0003	0.0003	0.0762	0.0003	0.0003	0.0003	0.0003	0.0003	0.0003	0.0003	0.1087	0.0289	0.492	0.0424
BHMT	0.0003	0.0003	0.0003	0.0003	0.0853	0.0003	0.0003	0.0003	0.0003	0.0003	0.0003	0.0003	0.0003	0.0003	0.0003	0.0003	0.0003
MRPS2	0.0854	0.0003	0.0003	0.0003	0.0003	0.0003	0.0003	0.0003	0.0003	0.0003	0.0003	0.0003	0.0003	0.0003	0.0003	0.0003	0.0003
ERC1	0.0179	0.0121	0.0003	0.0242	0.0323	0.0643	0.0183	0.0163	0.0003	0.0143	0.0202	0.013	0.0003	0.022	0.0349	0.0003	0.0442
MGEA5	0.0544	0.0324	0.0003	0.0003	0.0003	0.0003	0.0003	0.0003	0.0003	0.0003	0.0003	0.0003	0.0003	0.0003	0.0003	0.0003	0.0003
CDK11B	0.0866	0.0003	0.0003	0.0003	0.0003	0.0003	0.0003	0.0003	0.0003	0.0003	0.0003	0.0003	0.0003	0.0003	0.0003	0.0003	0.0003
SHBG	0.0003	0.0553	0.0003	0.0003	0.0316	0.1162	0.0003	0.0003	0.0003	0.0003	0.0953	0.0382	0.0003	0.6188	0.0003	0.0003	0.0003
ANO6	0.0003	0.0003	0.0352	0.0518	0.0003	0.0415	0.1508	0.0462	0.0163	0.0327	0.0652	0.0146	0.0003	0.0003	0.0411	0.0405	0.0883
ADSSL1	0.0003	0.0003	0.0868	0.0003	0.0003	0.0003	0.0352	0.0003	0.1127	0.0003	0.0003	0.0003	0.0003	0.0003	0.8964	0.1339	0.0003
WNT9B	0.0003	0.0003	0.0869	0.0003	0.0003	0.0003	0.0003	0.0003	0.0003	0.0003	0.0003	0.0003	0.0003	0.0003	0.0003	0.0003	0.0003
PI4KA	0.0077	0.0116	0.0242	0.0037	0.0411	0.0133	0.0181	0.0123	0.0003	0.0052	0.0099	0.0003	0.0003	0.0003	0.0151	0.0003	0.0003
RCL1	0.0003	0.0871	0.0003	0.0003	0.0003	0.0003	0.0003	0.0003	0.0003	0.0003	0.0003	0.0003	0.0003	0.0762	0.0003	0.0366	0.0408
CTR9	0.0003	0.088	0.0003	0.0003	0.0003	0.0003	0.0003	0.0003	0.0003	0.0003	0.0003	0.0003	0.0003	0.0003	0.0003	0.0003	0.0003
CDK7	0.0883	0.0003	0.0003	0.0003	0.0003	0.0003	0.0003	0.0003	0.0003	0.0003	0.0003	0.0003	0.0003	0.0003	0.0003	0.0003	0.0003
SPG20	0.0003	0.0003	0.0883	0.0003	0.0003	0.0003	0.025	0.0437	0.0003	0.0003	0.0003	0.0003	0.0003	0.0003	0.0003	0.0003	0.0003
ATP5G1	0.0003	0.0003	0.0887	0.0003	0.0003	0.0003	0.0003	0.0003	0.0003	0.0003	0.0003	0.0003	0.0003	0.0003	0.0003	0.0003	0.0003
TCN1	0.0003	0.0887	0.0003	0.0003	0.0003	0.0003	0.0003	0.0003	0.0003	0.0003	0.0003	0.0003	0.0003	0.0003	0.0003	0.0003	0.0003
TACC1	0.0217	0.0673	0.0003	0.0003	0.0003	0.1041	0.0423	0.0003	0.0003	0.0003	0.0003	0.0003	0.0003	0.0003	0.0003	0.0003	0.0003
MAFF	0.089	0.0003	0.0003	0.0003	0.0003	0.0003	0.0003	0.0003	0.0003	0.0003	0.0003	0.0003	0.0003	0.0003	0.0003	0.0003	0.0003
ACOX1	0.0392	0.0504	0.0003	0.0003	0.0003	0.0003	0.0003	0.0003	0.0003	0.0003	0.0003	0.0003	0.0003	0.0003	0.0003	0.0003	0.0003
EPT1	0.0003	0.0893	0.0003	0.0003	0.0003	0.0003	0.0003	0.0003	0.0003	0.0003	0.0003	0.0003	0.0003	0.0003	0.0003	0.0003	0.0003
MRPS27	0.0829	0.007	0.0003	0.0003	0.0003	0.0003	0.0003	0.0003	0.0003	0.0003	0.0003	0.0003	0.0003	0.0415	0.0003	0.0003	0.0439
NME7	0.0003	0.0003	0.0898	0.0003	0.0003	0.0003	0.0003	0.0003	0.0003	0.0003	0.0003	0.0003	0.0003	0.0003	0.0003	0.0003	0.0003
SLC39A11	0.0003	0.0898	0.0003	0.0003	0.0003	0.0003	0.0003	0.0003	0.0003	0.0003	0.0003	0.0003	0.0003	0.0003	0.0003	0.0003	0.0003
SLC12A6	0.0733	0.0169	0.0003	0.0003	0.0003	0.0003	0.0003	0.0003	0.0003	0.0003	0.0003	0.0003	0.0003	0.0003	0.0003	0.0003	0.0003
TRPS1	0.0899	0.0003	0.0003	0.0003	0.0003	0.6593	0.0003	0.0003	0.0003	0.0003	0.0003	0.0003	0.0003	0.0465	0.0003	0.3026	0.0003
SLC44A1	0.0181	0.0475	0.025	0.0003	0.0003	0.0295	0.0213	0.0133	0.0207	0.0003	0.0003	0.0003	0.0003	0.0003	0.0104	0.0192	0.0003
PDIA2	0.0003	0.0003	0.0595	0.0309	0.0003	0.0003	0.0003	0.0003	0.0003	0.0003	0.0003	0.0003	0.0003	0.6113	0.0003	0.0003	0.0003
TARSL2	0.0003	0.0003	0.011	0.0794	0.0003	0.0139	0.0003	0.0003	0.0003	0.0197	0.0003	0.2146	0.0003	0.0117	0.9433	0.0003	0.2352
RPTOR	0.0003	0.0657	0.0157	0.0003	0.0099	0.0181	0.0003	0.0003	0.0003	0.0003	0.0003	0.0066	0.0003	0.0003	0.0138	0.0117	0.0205
RAE1	0.0003	0.0908	0.0003	0.0003	0.0003	0.0003	0.0003	0.0003	0.0003	0.0003	0.0003	0.0003	0.0003	0.0003	0.0003	0.0003	0.0003
ADCY5	0.0003	0.0003	0.0003	0.0256	0.0657	0.0003	0.0003	0.0091	0.0003	0.0003	0.0003	0.0003	0.0003	0.0003	0.0003	0.0003	0.0003
TBC1D9B	0.0339	0.0575	0.0003	0.0003	0.0003	0.0003	0.0003	0.0003	0.0003	0.0003	0.0003	0.0003	0.0003	0.0003	0.0003	0.0003	0.0003
COL24A1	0.0003	0.0027	0.0167	0.0319	0.0407	0.0158	0.0284	0.0003	0.0407	0.0003	0.0519	0.1042	0.3174	0.5177	0.0944	0.1046	0.0003
UQCC	0.0406	0.0509	0.0003	0.0003	0.0003	0.0003	0.0003	0.0003	0.0003	0.0003	0.0003	0.0003	0.0003	0.0003	0.1357	0.0003	0.0937
CYP4F2	0.0913	0.0003	0.0003	0.0003	0.0003	0.0003	0.0003	0.0003	0.0003	0.0003	0.0003	0.0003	0.0003	0.0003	0.0003	0.0003	0.0003
PIK3C2A	0.0003	0.0003	0.0913	0.0003	0.0003	0.0003	0.0003	0.0003	0.0003	0.0003	0.0828	0.0003	0.0003	0.0003	0.0003	0.0003	0.0003
NFS1	0.0914	0.0003	0.0003	0.0003	0.0003	0.0003	0.0003	0.0003	0.0003	0.0003	0.0003	0.0003	0.0003	0.0003	0.0003	0.0003	0.0003
OSBPL11	0.0003	0.0146	0.0366	0.0003	0.0408	0.0003	0.0198	0.0243	0.0003	0.0003	0.0272	0.0003	0.025	0.0288	0.0272	0.0339	0.0637
ME3	0.0003	0.0003	0.064	0.0277	0.0003	0.0003	0.0142	0.0003	0.0003	0.0003	0.0003	0.0003	0.0003	0.0003	0.0299	0.0003	0.3012
NELFA	0.0476	0.0442	0.0003	0.0003	0.0003	0.0003	0.0091	0.0003	0.0003	0.0003	0.0003	0.0003	0.0003	0.0003	0.0113	1.076	0.5605
WDR45B	0.0003	0.0003	0.0003	0.0916	0.0003	0.0003	0.0953	0.0003	0.0003	0.0003	0.0003	0.0003	0.0003	0.0003	0.1275	0.0003	0.1588
ACACA	0.0716	0.0144	0.0003	0.0003	0.0064	0.0003	0.008	0.0003	0.0003	0.0003	0.0003	0.0003	0.0003	0.0003	0.0003	0.0003	0.0003
SLC12A4	0.0752	0.0173	0.0003	0.0003	0.0003	0.0003	0.0003	0.0003	0.0003	0.0003	0.0003	0.0003	0.0003	0.0003	0.0003	0.0003	0.0003
PPP1R9B	0.0207	0.0075	0.022	0.0129	0.0304	0.0402	0.0003	0.0123	0.0003	0.0003	0.0178	0.0003	0.0431	0.054	0.0251	0.0585	0.083
HIP1R	0.0832	0.01	0.0003	0.0003	0.0003	0.0003	0.0003	0.0003	0.0003	0.0003	0.0003	0.0003	0.0003	0.0003	0.0003	0.0003	0.0003
SNX8	0.0003	0.0434	0.0003	0.0003	0.0498	0.189	0.0003	0.0003	0.0003	0.0003	0.0003	0.0351	0.0003	0.1777	0.0686	0.4009	0.2967
ESRP2	0.0932	0.0003	0.0003	0.0003	0.0003	0.0003	0.0003	0.0003	0.0003	0.0003	0.0003	0.0003	0.0003	0.0003	0.0003	0.0003	0.0003
SLC22A18	0.0003	0.0934	0.0003	0.0003	0.0003	0.0003	0.0003	0.0003	0.0003	0.0003	0.0003	0.0003	0.0003	0.0003	0.0003	0.0003	0.0003
SPATA20	0.0003	0.0003	0.0568	0.0003	0.0369	0.0003	0.0003	0.0003	0.0003	0.0003	0.0003	0.0003	0.0003	0.0003	0.0235	0.0003	0.0003
NMI	0.0349	0.0003	0.0589	0.0003	0.0003	0.0003	0.0222	0.0003	0.0003	0.0003	0.0003	0.0003	0.0003	0.0003	0.0003	0.0003	0.0003
DHX29	0.0003	0.0936	0.0003	0.0003	0.0003	0.0003	0.0003	0.0003	0.0003	0.0003	0.0003	0.0003	0.0003	0.0003	0.0003	0.0003	0.0003
PARD6B	0.0936	0.0003	0.0003	0.0003	0.0003	0.0003	0.0003	0.0003	0.0003	0.0003	0.0003	0.0003	0.0003	0.0003	0.0003	0.0003	0.0003
PARD6G	0.0936	0.0003	0.0003	0.0003	0.0003	0.0003	0.0003	0.0003	0.0003	0.0003	0.0003	0.0003	0.0003	0.0003	0.0003	0.0003	0.0003
PDCL3	0.0003	0.0003	0.0174	0.0003	0.0766	0.0003	0.0883	0.0815	0.0003	0.0003	0.0003	0.0003	0.0003	0.0003	0.0003	0.0003	0.0003
GID8	0.0532	0.0409	0.0003	0.0003	0.0003	0.0003	0.0003	0.0003	0.0003	0.0003	0.0003	0.0003	0.0003	0.0003	0.211	0.0003	0.0003
FTSJ3	0.0581	0.0362	0.0003	0.0003	0.0003	0.0003	0.0003	0.0003	0.0003	0.0003	0.0003	0.0003	0.0003	0.0003	0.0003	0.0003	0.0003
GGH	0.0605	0.0338	0.0003	0.0003	0.0003	0.0003	0.0003	0.0003	0.0003	0.0003	0.0003	0.0003	0.0003	0.0003	0.0003	0.0003	0.0003
IMPAD1	0.0003	0.0494	0.0003	0.0003	0.0452	0.0003	0.0003	0.0003	0.0003	0.0003	0.0003	0.0003	0.0981	0.1592	0.0003	0.2792	0.0496
UNC119	0.0447	0.0501	0.0003	0.0003	0.0003	0.0003	0.0003	0.0003	0.0003	0.0003	0.0003	0.0003	0.0003	0.0003	0.0003	0.0003	0.0003
ANKRD35	0.0947	0.0003	0.0003	0.0003	0.0003	0.0003	0.0003	0.0003	0.0003	0.0003	0.0003	0.0003	0.0003	0.8838	0.0003	0.0003	0.0003
AACS	0.0949	0.0003	0.0003	0.0003	0.0003	0.0003	0.0003	0.0003	0.0003	0.0003	0.0003	0.0003	0.0003	0.0003	0.0003	0.0003	0.0003
TPRG1	0.095	0.0003	0.0003	0.0003	0.0003	0.0003	0.0003	0.0003	0.0003	0.0003	0.0003	0.0003	0.0003	0.0003	0.0003	0.0003	0.0003
IL1RAP	0.0634	0.0321	0.0003	0.0003	0.0003	0.0003	0.0003	0.0003	0.0003	0.0003	0.0003	0.0003	0.0003	0.0003	0.0003	0.0003	0.0003
GAK	0.0833	0.0122	0.0003	0.0003	0.0003	0.0003	0.0087	0.0003	0.0003	0.0003	0.0003	0.0003	0.0003	0.0003	0.0768	0.0343	0.0933
LLGL2	0.0003	0.0955	0.0003	0.0003	0.0003	0.0003	0.0003	0.0003	0.0003	0.0003	0.0003	0.0003	0.0003	0.0003	0.0003	0.0003	0.0003
NUP210	0.0851	0.0107	0.0003	0.0003	0.0003	0.0003	0.0003	0.0003	0.0003	0.0003	0.0003	0.0003	0.0003	0.0003	0.0003	0.0003	0.0003
MYOZ1	0.0003	0.0003	0.0003	0.0003	0.0956	0.0003	0.0003	0.0003	1.1043	0.0003	0.0003	0.0003	2.2106	0.0003	8.8504	3.0017	0.0003
DEPTOR	0.0003	0.0003	0.0668	0.0293	0.0003	0.0003	0.0445	0.0003	0.0003	0.0003	0.0003	0.0003	0.0003	0.0003	0.0003	0.0003	0.0003
PC	0.0768	0.0003	0.0003	0.0003	0.0193	0.0003	0.0003	0.0003	0.0003	0.0003	0.0003	0.0604	0.0003	0.0003	0.0003	0.0003	0.0003
THOC5	0.0003	0.0003	0.0958	0.0003	0.0003	0.0003	0.0234	0.0003	0.0152	0.0003	0.0346	0.0003	0.0003	0.0003	0.0499	0.0003	0.066
ATP5G3	0.0003	0.0003	0.0961	0.0003	0.0003	0.0003	0.0003	0.0003	0.0003	0.0003	0.0003	0.0003	0.0003	0.0003	0.0003	0.0003	0.0003
SPIN1	0.0962	0.0003	0.0003	0.0003	0.0003	0.0003	0.0003	0.0003	0.0003	0.0003	0.0003	0.0003	0.0003	0.0003	0.0003	0.0003	0.0003
IRF2BP1	0.0364	0.0003	0.0469	0.0136	0.0003	0.1113	0.0003	0.0163	0.0003	0.0003	0.0003	0.0003	0.0003	0.0003	0.1812	0.0003	0.1886
ARVCF	0.0003	0.0003	0.0003	0.0003	0.0968	0.0003	0.0003	0.0003	0.0003	0.0003	0.0003	0.0003	0.0003	0.0003	0.0003	0.0003	0.0003
CYP3A5	0.0969	0.0003	0.0003	0.0003	0.0003	0.0003	0.0003	0.0003	0.0003	0.0003	0.0003	0.0003	0.0003	0.0003	0.0003	0.0003	0.0003
STAT2	0.0324	0.0178	0.0344	0.0134	0.0003	0.0752	0.0163	0.0003	0.0251	0.0003	0.0003	0.0149	0.0705	0.1132	0.0467	0.1471	0.0821
ACSS3	0.0003	0.0003	0.0974	0.0003	0.0003	0.0003	0.0003	0.0003	0.0003	0.0003	0.0003	0.0003	0.0003	0.0003	0.0559	0.0549	0.0633
MVD	0.0686	0.0003	0.0291	0.0003	0.0003	0.2975	0.0971	0.0003	0.0003	0.1981	0.0003	0.0003	0.0003	0.0003	0.0003	0.0003	0.0003
OSBPL10	0.0003	0.0156	0.039	0.0003	0.0435	0.0003	0.0211	0.0259	0.0003	0.0003	1.2749	0.0003	0.0266	0.0308	0.029	0.0362	0.0679
ERC2	0.0204	0.0138	0.0003	0.0276	0.0368	0.0003	0.0209	0.0186	0.0003	0.0302	0.023	0.0148	0.0003	0.025	0.0397	0.0158	0.0504
PLA2G4A	0.0978	0.0003	0.0003	0.0003	0.0003	0.0003	0.0003	0.0003	0.0003	0.0003	0.0003	0.0003	0.0003	0.0003	0.0003	0.0003	0.0003
LOC101060345	0.0979	0.0003	0.0003	0.0003	0.0003	0.0003	0.0003	0.0003	0.0003	0.0003	0.0003	0.0003	0.0003	0.9135	0.0003	0.0003	0.0003
ST3GAL6	0.0003	0.0003	0.0003	0.0984	0.0003	0.0003	0.0003	0.0003	0.0003	0.0003	0.0003	0.0003	0.0003	0.0003	0.0003	0.0003	0.0003
FAM161A	0.0003	0.0003	0.0985	0.0003	0.0003	0.0003	0.0003	0.0003	0.0003	0.0003	0.0003	0.0003	0.0003	0.0003	0.0003	0.0003	0.0003
HYPK	0.0985	0.0003	0.0003	0.0003	0.0003	0.0003	0.0003	0.0003	0.0003	0.0003	0.0003	0.0003	0.0003	0.0003	0.667	0.0003	0.0003
PBX1	0.0989	0.0003	0.0003	0.0003	0.0003	0.0003	0.0003	0.0003	0.0003	0.0003	0.0003	0.0003	0.0003	0.0003	0.0003	0.0003	0.0003
ZNF624	0.0003	0.0003	0.099	0.0003	0.0003	0.0003	0.0003	0.0003	0.0003	0.0003	0.0003	0.0003	0.0003	0.0003	0.0003	0.0003	0.0003
FRK	0.0991	0.0003	0.0003	0.0003	0.0003	0.0003	0.0003	0.0003	0.0003	0.0003	0.0003	0.0003	0.0003	0.0003	0.0003	0.0003	0.0003
ZDHHC17	0.0992	0.0003	0.0003	0.0003	0.0003	0.0003	0.0003	0.0003	0.0003	0.0003	0.0003	0.0003	0.0003	0.0003	0.0003	0.0003	0.0003
DSCR3	0.0992	0.0003	0.0003	0.0003	0.0003	0.0631	0.0199	0.0293	0.025	0.0003	0.0003	0.0003	0.0003	0.0003	0.0378	0.05	0.0003
PARD6A	0.0995	0.0003	0.0003	0.0003	0.0003	0.0003	0.0003	0.0003	0.0003	0.0003	0.0003	0.0003	0.0003	0.0003	0.0003	0.0003	0.0003
FCHO2	0.0505	0.028	0.0003	0.0003	0.0218	0.0396	0.0003	0.0003	0.0003	0.0003	0.0003	0.0003	0.0003	0.0003	0.0003	0.0003	0.0288
GAPVD1	0.0999	0.0003	0.0003	0.0003	0.0003	0.0235	0.0079	0.0003	0.0003	0.0003	0.0003	0.0003	0.0003	0.0096	0.0184	0.0003	0.0238
THBD	0.0003	0.0003	0.1002	0.0003	0.0003	0.0723	0.0003	0.0003	0.0003	0.0003	0.0003	0.0003	0.0003	0.0003	0.0003	0.0003	0.0003
DNAJC10	0.1002	0.0003	0.0003	0.0003	0.0003	0.0922	0.0003	0.0003	0.0003	0.0003	0.0003	0.0003	0.0003	0.0003	0.0003	0.0003	0.0003
INPP5K	0.0003	0.0191	0.0003	0.0384	0.0436	0.0003	0.0246	0.0003	0.0003	0.0003	0.0003	0.0003	0.0003	0.0003	0.0003	0.0003	0.0003
TCOF1	0.0893	0.0003	0.0116	0.0003	0.0003	0.0181	0.0003	0.0003	0.0003	0.0003	0.0003	0.0271	0.0003	0.0003	0.0003	0.0003	0.0376
PCBP4	0.0272	0.0191	0.0335	0.0003	0.0218	0.0361	0.0176	0.0003	0.0003	0.0003	0.0003	0.0003	0.0003	0.0003	0.0097	0.0003	0.0003
APOL2	0.1008	0.0003	0.0003	0.0003	0.0003	0.0003	0.0003	0.0003	0.0003	0.0003	0.0003	0.0003	0.0003	0.0003	0.0003	0.0003	0.0003
C6orf132	0.0902	0.0109	0.0003	0.0003	0.0003	0.0003	0.0003	0.0003	0.0003	0.0003	0.0003	0.0003	0.0003	0.0003	0.0003	0.0003	0.0003
UBE2Z	0.0003	0.0582	0.0003	0.0429	0.0003	0.0003	0.0612	0.0003	0.0454	0.0959	0.0003	0.0003	0.0003	0.0003	0.0887	0.1979	0.0003
SCRN3	0.0003	0.0003	0.0662	0.0003	0.035	0.0003	0.0003	0.0403	0.0003	0.0003	0.0003	0.0003	0.0003	0.0003	0.0003	0.0003	0.0003
GIPC3	0.071	0.0308	0.0003	0.0003	0.0003	0.0003	0.0003	0.0003	0.0003	0.0003	0.0003	0.0003	0.0003	0.0003	0.0003	0.0003	0.0003
UBP1	0.1018	0.0003	0.0003	0.0003	0.0003	0.0658	0.0003	0.0003	0.0003	0.0003	0.0003	0.0003	0.0003	0.0003	0.0003	0.095	0.0003
NUP160	0.0834	0.0192	0.0003	0.0003	0.0003	0.0003	0.0003	0.0003	0.0003	0.0003	0.0003	0.0003	0.0003	0.0003	0.0003	0.0003	0.0003
CLDN6	0.0806	0.0224	0.0003	0.0003	0.0003	0.0003	0.0003	0.0003	0.0003	0.0003	0.0003	0.0003	0.0003	0.0003	0.0003	0.0003	0.0003
GNL3	0.1027	0.0003	0.0003	0.0003	0.0003	0.0003	0.0003	0.0003	0.0003	0.0003	0.0003	0.0003	0.0003	0.0003	0.0003	0.0003	0.0003
IKBKG	0.0847	0.0183	0.0003	0.0003	0.0003	0.0003	0.0003	0.0003	0.0003	0.0003	0.0003	0.0003	0.0003	0.0003	0.0003	0.0003	0.0003
ARHGAP6	0.0003	0.0003	0.0003	0.0318	0.0714	0.0003	0.0003	0.0003	0.0003	0.0003	0.0003	0.0003	0.0003	0.0003	0.0003	0.0003	0.0003
SMAP2	0.0003	0.1029	0.0003	0.0003	0.0003	0.0003	0.0003	0.0003	0.0968	0.0003	0.0003	0.0003	0.0003	0.1788	0.0003	0.4368	0.2829
WIPF1	0.0359	0.0003	0.0675	0.0003	0.0003	0.0003	0.0003	0.0003	0.0003	0.0003	0.0003	0.0003	0.0003	0.0003	0.0003	0.0003	0.0003
XAB2	0.0978	0.0057	0.0003	0.0003	0.0003	0.0003	0.0003	0.0003	0.0003	0.0003	0.0003	0.0003	0.0003	0.0003	0.0003	0.0003	0.0003
NTN1	0.0003	0.0003	0.1032	0.0003	0.0003	0.0003	0.0003	0.0111	0.0003	0.0003	0.0003	0.0003	0.0003	0.0003	0.0003	0.0003	0.0003
PTPRA	0.0003	0.0283	0.0752	0.0003	0.0003	0.0311	0.0003	0.0184	0.0137	0.0003	0.0003	0.0003	0.0003	0.0154	0.0003	0.0003	0.0003
AP1G2	0.0881	0.0155	0.0003	0.0003	0.0003	0.0003	0.0003	0.0003	0.0003	0.0003	0.0003	0.0003	0.0003	0.0003	0.0003	0.0003	0.0003
ATPAF2	0.1035	0.0003	0.0003	0.0003	0.0003	0.0003	0.0003	0.0003	0.0003	0.0003	0.0003	0.0003	0.0003	0.0003	0.0003	0.0003	0.0003
SGPL1	0.0654	0.0384	0.0003	0.0003	0.0003	0.0003	0.0003	0.0003	0.0003	0.0003	0.0003	0.0003	0.0003	0.0003	0.0003	0.0003	0.0003
HDDC2	0.0003	0.0441	0.0003	0.0609	0.0003	0.0003	0.0379	0.0003	0.0003	0.0003	0.0003	0.0269	0.0003	0.0003	0.0003	0.0384	0.0003
ACOT11	0.1049	0.0003	0.0003	0.0003	0.0003	0.0003	0.0003	0.0003	0.0003	0.0003	0.0003	0.0003	0.0003	0.0003	0.0003	0.0003	0.0003
TMEM79	0.1049	0.0003	0.0003	0.0003	0.0003	0.0003	0.0003	0.0003	0.0003	0.0003	0.0003	0.0003	0.0003	0.0003	0.0003	0.0003	0.0003
LIN7A	0.105	0.0003	0.0003	0.0003	0.0003	0.0003	0.0003	0.0003	0.0003	0.0003	0.0003	0.0003	0.0003	0.0003	0.0003	0.0003	0.0003
LIN7B	0.105	0.0003	0.0003	0.0003	0.0003	0.0003	0.0003	0.0003	0.0003	0.0003	0.0003	0.0003	0.0003	0.0003	0.0003	0.0003	0.0003
OCLN	0.105	0.0003	0.0003	0.0003	0.0003	0.0003	0.0003	0.0003	0.0003	0.0003	0.0003	0.0003	0.0003	0.0003	0.0003	0.0003	0.0003
TUBGCP2	0.0403	0.0003	0.065	0.0003	0.0003	0.0003	0.0051	0.0003	0.0003	0.0003	0.0003	0.0003	0.0003	0.0003	0.0073	0.0003	0.0003
CLASP1	0.0003	0.0003	0.0775	0.0035	0.0246	0.0055	0.0003	0.0003	0.0003	0.0003	0.0003	0.0003	0.0003	0.0003	0.0003	0.0003	0.0341
PAK1	0.0143	0.0421	0.0492	0.0003	0.0003	0.0516	0.0003	0.0003	0.0003	0.0003	0.0003	0.0003	0.0003	0.0003	0.0003	0.0003	0.0003
TXNDC9	0.0003	0.0003	0.0003	0.0003	0.1057	0.0003	0.0003	0.0003	0.0003	0.0003	0.0003	0.0003	0.0003	0.0003	0.0461	0.0003	0.0003
EPN1	0.0003	0.0003	0.0502	0.0003	0.0559	0.0003	0.0003	0.0003	0.0003	0.0003	0.0003	0.0003	0.0003	0.0003	0.0727	0.0003	0.2871
CD70	0.0003	0.0003	0.0003	0.0003	0.1058	0.3788	0.0935	0.1704	0.0003	0.0003	0.0003	0.0003	0.0003	0.0003	0.1092	0.0003	0.0003
APOF	0.0003	0.0003	0.0654	0.0408	0.0003	0.0003	0.0003	0.0003	0.0003	0.0468	0.0003	0.0559	0.0003	0.0003	0.0003	0.0003	0.0003
TLDC1	0.0003	0.106	0.0003	0.0003	0.0003	0.0003	0.0003	0.0003	0.0003	0.0003	0.0003	0.0003	0.0003	0.0003	0.0003	0.0003	0.0003
AES	0.0003	0.1065	0.0003	0.0003	0.0003	0.0003	0.0003	0.0003	0.0003	0.0003	0.0003	0.0003	0.0003	0.0003	0.0003	0.0003	0.0003
CTIF	0.0003	0.0003	0.0258	0.0003	0.0814	0.0003	0.0003	0.0003	0.0003	0.0003	0.0003	0.0003	0.0003	0.0003	0.0909	0.0003	0.0003
LRRC57	0.0003	0.107	0.0003	0.0003	0.0003	0.0741	0.0003	0.0003	0.0003	0.0003	0.0003	0.0003	0.0003	0.0003	0.0003	0.0003	0.0003
POLR2B	0.0978	0.0095	0.0003	0.0003	0.0003	0.0255	0.0003	0.0003	0.0003	0.0003	0.0003	0.0003	0.0003	0.0003	0.016	0.0239	0.0209
LPCAT4	0.1071	0.0003	0.0003	0.0003	0.0003	0.0003	0.0003	0.0003	0.0003	0.0003	0.0003	0.0003	0.0003	0.0003	0.0003	0.0003	0.0003
LEPRE1	0.0003	0.1072	0.0003	0.0003	0.0003	0.597	0.0092	0.0003	0.0003	0.0003	0.1286	0.0625	0.186	0.9467	0.3132	0.7767	1.7274
ARG1	0.0003	0.0003	0.0003	0.0003	0.1077	0.0003	0.0003	0.0003	0.0003	0.0003	0.0003	0.0392	0.0003	0.0003	0.0003	0.0003	0.0003
UMOD	0.0003	0.1077	0.0003	0.0003	0.0003	380.437	0.0003	0.0003	0.0003	0.0003	0.0003	0.0003	0.0003	1.8478	0.0003	0.0003	0.0003
ALOX5	0.0505	0.0579	0.0003	0.0003	0.0003	0.0003	0.0003	0.0003	0.0003	0.0003	0.0003	0.0003	0.0258	0.0003	0.0003	0.0003	0.1023
NDUFC2	0.1082	0.0003	0.0003	0.0003	0.0003	0.0003	0.0003	0.0003	0.0003	0.0003	0.0003	0.0003	0.0003	0.0003	0.0003	0.0003	0.0003
FAM53A	0.0003	0.0003	0.0003	0.1084	0.0003	0.0003	0.0003	0.0003	0.0003	0.0003	0.0003	0.0003	0.0003	0.0003	0.1034	0.0003	0.0003
FAM180A	0.0003	0.1087	0.0003	0.0003	0.0003	0.0003	0.0003	0.1002	0.0003	0.375	0.2999	0.3449	0.0003	0.0003	0.0003	0.0003	0.0003
RDH13	0.1088	0.0003	0.0003	0.0003	0.0003	0.0003	0.0003	0.0003	0.0003	0.0003	0.0003	0.0003	0.0003	0.0003	0.0003	0.0003	0.0003
ISCA2	0.1088	0.0003	0.0003	0.0003	0.0003	0.0003	0.0003	0.0003	0.0003	0.0003	0.0003	0.1755	0.0003	0.0003	0.0003	0.7482	0.0003
MYH6	0.0003	0.0003	0.07	0.0342	0.0052	0.0003	0.0181	0.0062	19.7703	0.0003	0.0008	0.0676	9.1739	0.0003	198.792	9.8959	0.0003
ABCD4	0.0003	0.0003	0.1089	0.0003	0.0003	0.0003	0.0003	0.0003	0.0003	0.0003	0.0003	0.0003	0.0003	0.0003	0.0003	0.0003	0.0003
NEDD4L	0.0003	0.0081	0.0794	0.022	0.0003	0.0274	0.0904	0.0281	0.0333	0.0537	0.0623	0.0286	0.0558	0.0003	0.0401	0.0003	0.0333
USP9Y	0.0551	0.0206	0.0117	0.0203	0.0026	0.0003	0.0097	0.0048	0.0003	0.0061	0.0003	0.0048	0.0059	0.0122	0.0187	0.0334	0.0282
PRKCI	0.0003	0.0003	0.1091	0.0003	0.0003	0.1115	0.0882	0.0003	0.0003	0.0003	0.0003	0.0003	0.0003	0.0003	0.0003	0.0003	0.0003
SEMA3B	0.0003	0.0003	0.0855	0.0243	0.0003	0.0003	0.0003	0.0852	0.0003	0.0003	0.0003	0.052	0.0003	0.0003	0.0003	0.0003	0.0003
L2HGDH	0.0003	0.0003	0.0825	0.0273	0.0003	0.0003	0.0003	0.0003	0.022	0.0003	0.0003	0.0003	0.0003	0.0003	0.1266	0.0003	0.0003
SKIV2L	0.0148	0.0003	0.0607	0.0103	0.0246	0.0184	0.0438	0.0085	0.0278	0.0003	0.0003	0.0235	0.0003	0.0154	0.0194	0.0526	0.2547
ST14	0.1096	0.0003	0.0003	0.0003	0.0003	0.0003	0.0003	0.0003	0.0003	0.0003	0.2851	0.0003	0.0003	0.0003	0.0003	0.0003	0.0003
TBCD	0.0003	0.0094	0.0485	0.0364	0.0163	0.074	0.0288	0.0106	0.006	0.0119	0.0133	0.0143	0.0003	0.0381	0.0196	0.07	0.0003
ZDHHC13	0.1098	0.0003	0.0003	0.0003	0.0003	0.0003	0.0003	0.0003	0.0003	0.0003	0.0003	0.0003	0.0003	0.0003	0.0003	0.0003	0.0003
LGALS8	0.11	0.0003	0.0003	0.0003	0.0003	0.0003	0.0003	0.0003	0.0003	0.0003	0.0003	0.0003	0.0003	0.0003	0.0003	0.0003	0.0003
AP3M2	0.0666	0.0438	0.0003	0.0003	0.0003	0.0003	0.0003	0.0003	0.0003	0.0003	0.0003	0.0003	0.0003	0.0003	0.0003	0.0003	0.0003
NCDN	0.0375	0.0003	0.0509	0.0223	0.0003	0.1048	0.03	0.0148	0.0003	0.0381	0.0468	0.1294	0.0003	0.0198	0.1604	0.1851	0.3829
TCIRG1	0.0259	0.0846	0.0003	0.0003	0.0003	0.0146	0.0003	0.0003	0.0003	0.0003	0.0003	0.0003	0.0003	0.0003	0.0209	0.0596	0.0728
RAB3GAP2	0.0971	0.0136	0.0003	0.0003	0.0003	0.0003	0.0003	0.0003	0.0003	0.0003	0.0003	0.0003	0.0003	0.0003	0.0114	0.0003	0.017
ADAM17	0.0653	0.0458	0.0003	0.0003	0.0003	0.0003	0.0003	0.0003	0.0003	0.0003	0.0003	0.0003	0.0003	0.0003	0.0003	0.0003	0.0003
2021-09-04	0.1108	0.0003	0.0003	0.0003	0.0003	0.0003	0.0003	0.0003	0.0003	0.0003	0.0003	0.0003	0.0003	0.0003	0.0003	0.0003	0.0003
COL25A1	0.0355	0.0317	0.0003	0.0003	0.0443	0.0003	0.0003	0.0003	0.0003	0.0003	0.0003	0.0003	0.0003	0.0003	0.0003	0.0003	0.0003
TRAPPC1	0.1109	0.0003	0.0003	0.0003	0.0003	0.0003	0.0003	0.0003	0.0003	0.0003	0.0003	0.0003	0.0003	0.0003	0.0003	0.0003	0.0003
MYO1A	0.0003	0.0837	0.0198	0.0003	0.008	0.0003	0.0054	0.0067	0.0003	0.0003	0.0003	0.0003	0.0003	0.0411	0.0003	0.0262	0.0106
NDRG4	0.1111	0.0003	0.0003	0.0003	0.0003	0.0003	0.0003	0.0003	0.0003	0.0003	0.0003	0.0003	0.0003	0.0003	0.0003	0.0003	0.0003
RDH12	0.1112	0.0003	0.0003	0.0003	0.0003	0.0003	0.0003	0.0003	0.0003	0.0003	0.0003	0.0003	0.0003	0.0003	0.0003	0.0003	0.0003
PPP3R2	0.0003	0.0003	0.1112	0.0003	0.0003	0.0003	0.0491	0.0642	0.0003	0.0003	0.0003	0.0003	0.0003	0.0003	0.0003	0.0003	0.0003
AKAP9	0.0003	0.0017	0.0003	0.0003	0.1099	0.0003	0.0003	0.0003	0.0003	0.0003	0.0003	0.0003	0.0095	0.0003	0.0154	0.0003	0.0003
TBCC	0.1114	0.0003	0.0003	0.0003	0.0003	0.0003	0.0003	0.0003	0.0003	0.0003	0.0003	0.0003	0.0003	0.0003	0.0003	0.0003	0.0003
DIS3	0.0744	0.0249	0.0127	0.0003	0.0003	0.115	0.0003	0.0003	0.0003	0.0003	0.0003	0.0064	0.0003	0.0003	0.0566	0.1199	0.1448
SEC24B	0.0167	0.0125	0.0577	0.0255	0.0003	0.052	0.0367	0.0003	0.0184	0.0296	0.0379	0.0115	0.0003	0.0986	0.0434	0.0003	0.1262
KCNK12	0.0003	0.0003	0.1118	0.0003	0.0003	0.0003	0.0003	0.0003	0.0003	0.0003	0.0003	0.0003	0.0003	0.0003	0.0003	0.0003	0.0003
IGFBP5	0.0003	0.0003	0.112	0.0003	0.0003	0.0003	0.0003	0.0621	0.0003	0.0003	0.0003	0.0003	0.0003	0.0003	0.0003	0.0003	0.0003
VAC14	0.0423	0.0003	0.0704	0.0003	0.0003	0.033	0.0003	0.0003	0.0003	0.0003	0.0003	0.0685	0.018	0.0251	0.0003	0.0187	0.0922
RIPK1	0.0003	0.0939	0.019	0.0003	0.0003	0.0003	0.0003	0.0003	0.0003	0.0003	0.0003	0.0003	0.0003	0.0003	0.0003	0.0003	0.0003
ZXDB	0.0003	0.0003	0.0003	0.1126	0.0003	0.0003	0.0003	0.0003	0.0003	0.0003	0.0003	0.0003	0.0003	0.0003	0.0003	0.0003	0.0003
MAN2A1	0.1129	0.0003	0.0003	0.0003	0.0003	0.0478	0.0003	0.0003	0.0003	0.0003	0.0003	0.0003	0.0003	0.095	0.028	0.1254	0.0967
METRN	0.0003	0.0003	0.0003	0.1129	0.0003	0.0003	0.0003	0.9218	0.0003	0.0829	0.0003	0.2584	0.0003	0.0003	0.0003	0.0003	0.0003
FAM161B	0.0003	0.1135	0.0003	0.0003	0.0003	0.0003	0.0003	0.0003	0.0003	0.0003	0.0003	0.0003	0.0003	0.0003	0.0003	0.0003	0.0003
TMEM119	0.0003	0.0905	0.0003	0.0003	0.0233	0.8764	0.04	0.2377	0.0266	0.2169	0.0003	0.0003	0.0003	0.1204	0.0003	0.143	0.5329
CUL2	0.0003	0.0729	0.0003	0.0003	0.0411	0.0394	0.0003	0.0203	0.0003	0.021	0.0003	0.0003	0.0003	0.0253	0.0164	0.0003	0.0393
DCAF7	0.1137	0.0003	0.0003	0.0003	0.0003	0.0003	0.0003	0.0003	0.0003	0.0003	0.0003	0.0003	0.0003	0.0003	0.163	0.0003	0.0003
SCYL2	0.0425	0.0299	0.0157	0.0003	0.0266	0.0003	0.0003	0.0122	0.0003	0.0003	0.0003	0.0003	0.0003	0.0003	0.0003	0.0003	0.0003
IGF2BP2	0.0504	0.0638	0.0003	0.0003	0.0003	0.1909	0.0003	0.0003	0.0003	0.0003	0.0003	0.0003	0.0003	0.0003	0.0003	0.0875	0.124
NEDD4	0.0003	0.0085	0.0831	0.023	0.0003	0.0287	0.0946	0.0294	0.0349	0.0562	0.0652	0.0299	0.0584	0.0003	0.0419	0.0003	0.0349
CLDN3	0.0896	0.0248	0.0003	0.0003	0.0003	0.0003	0.0003	0.0003	0.0003	0.0003	0.0003	0.0003	0.0003	0.0003	0.0003	0.0003	0.0003
DSC1	0.0927	0.0003	0.0218	0.0003	0.0003	0.0003	0.0003	0.0003	0.0003	0.0003	0.0003	0.0003	0.0003	0.0003	0.0003	0.0003	0.0003
ITPR2	0.0051	0.0155	0.0628	0.0003	0.0317	0.0003	0.0314	0.0003	0.0003	0.0224	0.0209	0.0091	0.0003	0.0003	0.0003	0.004	0.0078
ATXN2L	0.1144	0.0003	0.0003	0.0003	0.0003	0.0003	0.0003	0.0003	0.0003	0.0003	0.0003	0.0003	0.0003	0.0003	0.0003	0.0003	0.0003
MX2	0.0336	0.0003	0.0596	0.0003	0.0218	0.0364	0.0003	0.0003	0.0171	0.0003	0.0137	0.0003	0.0388	0.0751	0.0089	0.0938	0.0489
PIGS	0.0541	0.0158	0.0451	0.0003	0.0003	0.7066	0.0003	0.0322	0.0003	0.0003	0.0003	0.0003	0.0003	0.0003	0.0003	0.0484	0.0327
ETFDH	0.0003	0.0003	0.1152	0.0003	0.0003	0.0003	0.0003	0.0003	0.0003	0.0003	0.0003	0.0003	0.0003	0.0003	0.0003	0.0003	0.0003
SERPINE2	0.0003	0.1153	0.0003	0.0003	0.0003	0.0003	0.0003	0.3536	0.0003	0.134	0.0003	0.3155	0.0003	0.579	0.0003	0.2453	0.0003
MYH7	0.0003	0.0003	0.0544	0.0562	0.0053	0.0003	0.0091	0.0034	31.5727	0.0003	0.0008	0.1698	12.0307	0.0003	353.013	11.5693	0.0003
EPM2AIP1	0.0003	0.1155	0.0003	0.0003	0.0003	0.0003	0.0003	0.0003	0.0003	0.0003	0.0003	0.0003	0.0003	0.0003	0.0003	0.0003	0.0003
MAT1A	0.0003	0.1155	0.0003	0.0003	0.0003	0.0003	0.0003	0.0003	0.0003	0.0003	0.0003	0.0003	0.0003	0.0003	0.0003	0.0003	0.0003
PTCD3	0.0925	0.0235	0.0003	0.0003	0.0003	0.0003	0.0003	0.0003	0.0003	0.0003	0.0003	0.0003	0.0003	0.0003	0.0003	0.0003	0.0003
QPCTL	0.0612	0.0549	0.0003	0.0003	0.0003	0.0003	0.0003	0.0003	0.0003	0.0003	0.0003	0.6286	0.0003	0.0003	0.0003	1.1637	0.8539
MYD88	0.0003	0.0003	0.1163	0.0003	0.0003	0.0003	0.0003	0.0003	0.0003	0.0003	0.0003	0.0003	0.0003	0.0003	0.109	0.2338	0.1898
C12orf44	0.0003	0.0003	0.1165	0.0003	0.0003	0.0003	0.0003	0.0003	0.0003	0.0003	0.0003	0.0003	0.0003	0.0003	0.0003	0.0003	0.0003
ZFAND1	0.0003	0.0003	0.0724	0.0003	0.0444	0.113	0.0003	0.0003	0.0003	0.0003	0.0003	0.0243	0.0003	0.0706	0.0003	0.1747	0.0003
ALDOB	0.0003	0.0003	0.0003	0.0003	0.1169	0.0003	0.0003	0.0003	0.0003	0.0003	0.0003	0.0003	0.0003	0.0003	0.0003	0.0003	0.0003
CRLF1	0.0003	0.0003	0.0003	0.117	0.0003	0.0003	0.0003	0.1186	0.0003	0.0003	0.0003	0.0003	0.0003	0.0003	0.0003	0.0003	0.0003
MCM7	0.1171	0.0003	0.0003	0.0003	0.0003	0.0003	0.0003	0.0003	0.0003	0.0003	0.0003	0.0003	0.0003	0.0003	0.0003	0.0003	0.0003
PLOD3	0.0003	0.09	0.0274	0.0003	0.0003	0.1524	0.0003	0.0003	0.0003	0.0003	0.2036	0.0003	0.103	0.0003	0.0003	0.5473	0.0996
P4HA1	0.0894	0.0003	0.0003	0.0003	0.028	0.8171	0.0003	0.0003	0.2428	0.0341	0.0003	0.0003	0.1607	0.6615	0.5419	1.9598	0.7601
PNKD	0.1173	0.0003	0.0003	0.0003	0.0003	0.0003	0.0003	0.0003	0.0003	0.0003	0.0003	0.0003	0.0003	0.0003	0.0003	0.0003	0.0003
ZNF326	0.0784	0.0392	0.0003	0.0003	0.0003	0.0003	0.0003	0.0003	0.0003	0.0003	0.0003	0.0003	0.0003	0.0003	0.0003	0.0003	0.0003
RBM10	0.1175	0.0003	0.0003	0.0003	0.0003	0.0003	0.0003	0.0003	0.0003	0.0003	0.0003	0.0003	0.0003	0.0003	0.0003	0.0003	0.0003
SYN3	0.0003	0.0003	0.0003	0.0003	0.1176	0.0003	0.0003	0.0003	0.0003	0.0003	0.0003	0.0003	0.0003	0.0003	0.0003	0.0003	0.0003
ALKBH5	0.1179	0.0003	0.0003	0.0003	0.0003	0.0003	0.0003	0.0003	0.0003	0.0003	0.0003	0.0003	0.0003	0.0003	0.0003	0.0003	0.0003
LOC728026	0.1183	0.0003	0.0003	0.0003	0.0003	0.0003	0.0003	0.0003	0.0003	0.0003	0.0003	0.0003	0.0003	0.0003	0.0003	0.0003	0.0003
SLC9A1	0.0912	0.0275	0.0003	0.0003	0.0003	0.0003	0.0003	0.0003	0.0003	0.0003	0.0003	0.0003	0.0003	0.0003	0.0003	0.0003	0.0003
ITGAM	0.1051	0.0141	0.0003	0.0003	0.0003	0.2721	0.0003	0.0003	0.0003	0.0003	0.0003	0.0172	0.0395	0.0357	0.0172	0.0485	0.0003
TACC2	0.0921	0.0276	0.0003	0.0003	0.0003	0.0003	0.0003	0.0003	0.0003	0.0003	0.0003	0.0003	0.0003	0.0003	0.0003	0.0003	0.0003
STAP2	0.1199	0.0003	0.0003	0.0003	0.0003	0.0003	0.0003	0.0003	0.0003	0.0003	0.0003	0.0003	0.0003	0.0003	0.0003	0.0003	0.0003
TJP3	0.0488	0.0714	0.0003	0.0003	0.0003	0.0003	0.0003	0.0003	0.0003	0.0003	0.0003	0.0003	0.0003	0.0003	0.0003	0.0003	0.0003
GTPBP1	0.0422	0.078	0.0003	0.0003	0.0003	0.1981	0.293	1.1812	0.0003	0.0003	4.6352	0.7933	0.0003	0.0003	1.4415	0.0003	0.0003
HMGCL	0.0003	0.0657	0.0547	0.0003	0.0003	0.0003	0.0298	0.0003	0.0624	0.0003	0.0003	0.0003	0.0003	0.0003	0.1083	0.0003	0.1059
ADPRH	0.0003	0.0003	0.0003	0.0003	0.1201	0.0003	0.0003	0.0513	0.0003	0.0003	0.0003	0.0003	0.0003	0.0003	0.0003	0.0003	0.2685
MCM5	0.1205	0.0003	0.0003	0.0003	0.0003	0.0003	0.0003	0.0003	0.0003	0.0003	0.0003	0.0003	0.0003	0.0003	0.0003	0.0003	0.0003
AASDHPPT	0.0003	0.121	0.0003	0.0003	0.0003	0.0003	0.2891	0.0003	0.0003	0.0003	0.0003	0.0003	0.0003	0.0003	0.0003	0.0003	0.0003
PFAS	0.0446	0.0718	0.0003	0.0053	0.0003	0.2462	0.0217	0.0113	0.097	0.0003	0.027	0.0302	0.0003	0.0003	0.0607	0.0003	0.0796
OSBPL5	0.0331	0.0003	0.0398	0.0168	0.0325	0.0003	0.0064	0.0228	0.0003	0.0003	0.0003	0.004	0.0003	0.0003	0.0084	0.0003	0.0254
STK38	0.0576	0.0257	0.0003	0.0003	0.0386	0.0003	0.064	0.1151	0.0003	0.0003	0.0003	0.0003	0.0003	0.0003	0.0382	0.0287	0.0003
EOGT	0.0003	0.0003	0.1213	0.0003	0.0003	0.056	0.0003	0.0359	0.0003	0.0582	0.0736	0.0003	0.4034	0.0003	0.1497	0.0003	0.1758
ARFGAP3	0.0003	0.0354	0.0688	0.0181	0.0003	0.0003	0.0126	0.0003	0.0003	0.0003	0.0003	0.0119	0.0164	0.0478	0.101	0.2254	0.0003
CCDC80	0.0003	0.0003	0.0145	0.0003	0.1075	1.4164	0.0003	0.0164	0.6798	0.6719	0.1541	0.1864	0.8773	1.4155	0.0737	2.5203	1.8924
RABEP2	0.06	0.0446	0.0179	0.0003	0.0003	0.0003	0.0003	0.0003	0.0003	0.0003	0.0003	0.0003	0.0003	0.0003	0.0003	0.0003	0.0003
PAPLN	0.0447	0.011	0.0003	0.0003	0.0668	0.0003	0.0803	0.0214	0.0003	0.0664	0.0737	0.0003	0.0003	0.0003	0.0003	0.0003	0.0286
GMEB1	0.1221	0.0003	0.0003	0.0003	0.0003	0.0003	0.0003	0.0003	0.0003	0.0003	0.0003	0.0003	0.0003	0.0003	0.0003	0.0003	0.0003
PGP	0.0003	0.0406	0.0003	0.0003	0.0823	0.0786	0.0003	0.0003	0.0003	0.0003	0.0003	0.0003	0.0003	0.0003	0.0003	0.0477	0.1243
CYP4F3	0.1234	0.0003	0.0003	0.0003	0.0003	0.0003	0.0003	0.0003	0.0003	0.0003	0.0003	0.0003	0.0003	0.0003	0.0003	0.0003	0.0003
AHCTF1	0.0003	0.0003	0.0003	0.1236	0.0003	0.0003	0.0003	0.0003	0.0003	0.0003	0.0003	0.0003	0.0003	0.0003	0.0003	0.0003	0.0003
NRXN2	0.0003	0.0003	0.1236	0.0003	0.0003	0.0003	0.0003	0.0003	0.0003	0.0003	0.0003	0.0003	0.0003	0.0003	0.0003	0.0003	0.0003
NDUFC2-KCTD14	0.1237	0.0003	0.0003	0.0003	0.0003	0.0003	0.0003	0.0003	0.0003	0.0003	0.0003	0.0003	0.0003	0.0003	0.0003	0.0003	0.0003
DHX16	0.1242	0.0003	0.0003	0.0003	0.0003	0.0003	0.0202	0.0003	0.0003	0.0003	0.0003	0.0003	0.0003	0.0003	0.0003	0.0003	0.0197
COL5A3	0.0003	0.0003	0.0675	0.0295	0.0279	0.4229	0.0543	0.0266	0.0159	0.0525	0.0409	0.0333	0.0429	0.0953	0.041	1.7354	0.1213
MRPL43	0.0003	0.1245	0.0003	0.0003	0.0003	0.0003	0.0003	0.0003	0.0003	0.0003	0.0003	0.0003	0.0003	0.0003	0.0003	0.0003	0.0003
TSSC4	0.0003	0.1247	0.0003	0.0003	0.0003	0.1152	0.0003	0.0003	0.0003	0.0003	0.0003	0.0003	0.0003	0.0003	0.0003	0.0003	0.0003
NRM	0.1249	0.0003	0.0003	0.0003	0.0003	0.0003	0.0003	0.0003	0.0003	0.0003	0.0003	0.0003	0.0003	0.0003	0.0003	0.0003	0.0003
ACY1	0.0003	0.1251	0.0003	0.0003	0.0003	0.0003	0.0003	0.0003	0.0003	0.0003	0.0003	0.0003	0.0003	0.0003	0.0003	0.0003	0.0003
OSBPL9	0.0003	0.0003	0.0003	0.0242	0.1013	0.1378	0.0003	0.0567	0.0464	0.0728	0.0514	0.0152	0.0471	0.0003	0.0003	0.0449	0.0774
ARAP1	0.0359	0.033	0.0003	0.0456	0.0117	0.0166	0.0003	0.0312	0.0003	0.0003	0.0177	0.0003	0.0226	0.0535	0.0346	0.0003	0.0648
HNMT	0.0003	0.0003	0.0003	0.0003	0.1261	0.0003	0.0003	0.0764	0.0003	0.0003	0.0003	0.0003	0.0003	0.0003	0.0003	0.0003	0.0003
PARP9	0.1262	0.0003	0.0003	0.0003	0.0003	0.0003	0.0003	0.0003	0.0003	0.0003	0.0003	0.0003	0.0003	0.0003	0.0003	0.0003	0.0003
LOC100286914	0.0003	0.0003	0.098	0.0003	0.0287	0.0003	0.0003	0.0003	0.0003	0.0003	0.0003	0.0003	0.0003	0.0003	0.0003	0.0003	0.0003
LOC100288646	0.0003	0.0003	0.098	0.0003	0.0287	0.0003	0.0003	0.0003	0.0003	0.0003	0.0003	0.0003	0.0003	0.0003	0.0003	0.0003	0.0003
LOC100653358	0.0003	0.0003	0.098	0.0003	0.0287	0.0003	0.0003	0.0003	0.0003	0.0003	0.0003	0.0003	0.0003	0.0003	0.0003	0.0003	0.0003
NR5A2	0.0003	0.1274	0.0003	0.0003	0.0003	0.0003	0.0003	0.0003	0.0003	0.0003	0.0003	0.0003	0.0003	0.0003	0.0003	0.0003	0.0003
SPRYD4	0.0003	0.1274	0.0003	0.0003	0.0003	0.0003	0.0003	0.0003	0.0003	0.0003	0.0003	0.0003	0.0003	0.0003	0.0003	0.0003	0.0003
SSFA2	0.1048	0.0229	0.0003	0.0003	0.0003	0.0003	0.0003	0.0003	0.0003	0.0003	0.0003	0.0003	0.0003	0.0003	0.0003	0.0003	0.0003
MYO5B	0.073	0.0003	0.0225	0.0003	0.0327	0.0185	0.0055	0.0288	0.0003	0.0149	0.0593	0.0231	0.0518	0.0554	0.0122	0.0136	0.0003
PLBD1	0.101	0.0269	0.0003	0.0003	0.0003	0.1189	0.0003	0.0003	0.0003	0.0003	0.0003	0.0003	0.0003	0.0003	0.0003	0.2013	0.0003
RBBP5	0.1281	0.0003	0.0003	0.0003	0.0003	0.0003	0.0003	0.0003	0.0003	0.0003	0.0003	0.0003	0.0003	0.0003	0.0003	0.0003	0.0003
BRE	0.1282	0.0003	0.0003	0.0003	0.0003	0.0003	0.0003	0.0003	0.0003	0.0003	0.0003	0.0003	0.0003	0.0003	0.0003	0.0003	0.0003
PPP4R1	0.07	0.0075	0.0513	0.0003	0.0003	0.0003	0.0003	0.0003	0.0003	0.0003	0.0003	0.0003	0.0003	0.0003	0.0003	0.0003	0.0408
CLDN4	0.1008	0.0279	0.0003	0.0003	0.0003	0.0003	0.0003	0.0003	0.0003	0.0003	0.0003	0.0003	0.0003	0.0003	0.0003	0.0003	0.0003
CLDN9	0.1008	0.0279	0.0003	0.0003	0.0003	0.0003	0.0003	0.0003	0.0003	0.0003	0.0003	0.0003	0.0003	0.0003	0.0003	0.0003	0.0003
CENPV	0.0003	0.0003	0.1287	0.0003	0.0003	0.0003	0.0838	0.0003	0.0003	0.0003	0.0003	0.0003	0.0003	0.0003	0.0003	0.0003	0.0003
DHX36	0.1292	0.0003	0.0003	0.0003	0.0003	0.0003	0.0003	0.0003	0.0003	0.0003	0.0003	0.0003	0.0003	0.0003	0.0003	0.0003	0.0003
RBM17	0.0849	0.0447	0.0003	0.0003	0.0003	0.0003	0.0003	0.0003	0.0003	0.0003	0.0003	0.0003	0.0003	0.0003	0.0003	0.0003	0.0003
CHMP1A	0.0003	0.0003	0.1017	0.028	0.0003	0.0003	0.0615	0.0003	0.0003	0.0003	0.0003	0.0003	0.0003	0.0003	0.0003	0.0003	0.0003
EML3	0.0803	0.0003	0.0003	0.0003	0.0496	0.0562	0.0105	0.0003	0.0003	0.0003	0.0003	0.0003	0.0241	0.0003	0.0547	0.034	0.0003
EMC2	0.1301	0.0003	0.0003	0.0003	0.0003	0.0003	0.0003	0.0003	0.0003	0.0003	0.0003	0.0003	0.0003	0.0003	0.0003	0.0003	0.0003
FZD3	0.0003	0.1303	0.0003	0.0003	0.0003	0.0003	0.0003	0.0003	0.0003	0.0003	0.0003	0.0003	0.0003	0.0003	0.0003	0.0003	0.0003
UGT1A7	0.1284	0.0022	0.0003	0.0003	0.0003	0.0003	0.0003	0.0003	0.0003	0.0003	0.0003	0.0003	0.0003	0.0003	0.0003	0.0003	0.0003
ATR	0.0003	0.0482	0.0003	0.0383	0.0446	0.0003	0.0003	0.0003	0.0003	0.0003	0.0003	0.0378	0.0003	0.0003	0.0003	0.0003	0.0003
MYH3	0.0074	0.0003	0.0837	0.0352	0.0051	0.0003	0.0089	0.0033	18.7316	0.0003	0.0008	0.0399	36.0035	0.0003	124.798	33.1775	0.0003
FLT4	0.0003	0.0003	0.1306	0.0003	0.0003	0.0003	0.0003	0.0003	0.0003	0.0003	0.0003	0.0003	0.0003	0.0003	0.0003	0.0003	0.0003
GCNT3	0.1308	0.0003	0.0003	0.0003	0.0003	0.0003	0.0003	0.0003	0.0003	0.0003	0.0003	0.0003	0.0003	0.0003	0.0003	0.0003	0.0003
SAA2-SAA4	0.0003	0.0003	0.0855	0.0115	0.0347	0.088	0.0003	0.0003	0.0003	0.0003	0.0003	0.0858	0.0277	0.086	0.0003	0.0003	0.0003
KIAA1217	0.096	0.0263	0.0058	0.0044	0.0003	0.0003	0.0003	0.0035	0.0106	0.0665	0.0003	0.0039	0.0104	0.0578	0.1293	0.0882	0.0255
RTN2	0.0003	0.0003	0.0003	0.0003	0.1318	0.0003	0.0003	0.0003	0.2767	0.0003	0.0003	0.0003	0.098	0.0003	1.1738	0.0003	0.0003
SLFN5	0.0733	0.0003	0.0589	0.0003	0.0003	0.0003	0.0003	0.0003	0.0003	0.0003	0.0003	0.0003	0.0003	0.0003	0.0523	0.0003	0.0003
RPS6KA1	0.0519	0.0804	0.0003	0.0003	0.0003	0.0003	0.0003	0.0377	0.0003	0.0003	0.0003	0.0003	0.0003	0.0003	0.0003	0.0003	0.0003
C6orf203	0.0003	0.0003	0.1327	0.0003	0.0003	0.0003	0.0003	0.0003	0.0003	0.0003	0.0003	0.0003	0.0003	0.0003	0.0003	0.0003	0.0003
NUP107	0.0992	0.0344	0.0003	0.0003	0.0003	0.0003	0.0003	0.0003	0.0003	0.0003	0.0003	0.0003	0.0003	0.0003	0.0003	0.0003	0.0003
ARHGEF18	0.1336	0.0003	0.0003	0.0003	0.0003	0.0003	0.0003	0.0003	0.0003	0.0003	0.0003	0.0003	0.0003	0.0003	0.0003	0.0003	0.0003
VASN	0.0003	0.0003	0.0373	0.0003	0.0967	0.2412	0.0003	0.0003	0.1009	0.0003	0.0003	0.0003	0.2226	0.3769	0.0003	0.9099	0.7545
RAD21	0.1081	0.0151	0.0003	0.0112	0.0003	0.0282	0.0098	0.0117	0.0003	0.0003	0.0139	0.0098	0.0003	0.0003	0.0003	0.0196	0.0003
GLA	0.1339	0.0003	0.0003	0.0003	0.0003	0.0003	0.0003	0.0003	0.0003	0.0003	0.0003	0.0003	0.0003	0.0003	0.0003	0.0003	0.0003
ARHGEF7	0.013	0.0282	0.0299	0.0243	0.0397	0.0958	0.0003	0.0179	0.0003	0.0003	0.0003	0.0003	0.0377	0.0003	0.0173	0.0507	0.0963
PPFIBP2	0.0382	0.0003	0.0003	0.0349	0.0616	0.0453	0.0245	0.096	0.0003	0.0003	0.0349	0.0003	0.0003	0.0003	0.0514	0.0615	0.1635
FXYD1	0.0003	0.0003	0.1342	0.0003	0.0003	0.0003	0.0758	0.0003	0.0003	0.0003	0.0003	0.0003	0.0003	0.0003	0.0003	0.0003	0.0003
OAF	0.0003	0.0003	0.1346	0.0003	0.0003	0.0003	0.0003	0.0577	0.0003	0.0003	0.0003	0.1346	0.0003	0.0003	0.0003	0.0003	0.0003
TXN2	0.0003	0.1346	0.0003	0.0003	0.0003	0.3316	0.0003	0.0003	0.0003	0.0003	0.0003	0.0003	0.1333	0.1809	0.2271	0.0003	0.0003
CRNKL1	0.1347	0.0003	0.0003	0.0003	0.0003	0.0003	0.0003	0.0003	0.0003	0.0003	0.0003	0.0003	0.0003	0.0003	0.0003	0.0003	0.0003
RMDN1	0.0003	0.0983	0.0372	0.0003	0.0003	0.0003	0.0003	0.0003	0.0003	0.0003	0.0003	0.0003	0.0003	0.0003	0.0003	0.0003	0.1106
MAP7D1	0.0658	0.0003	0.0003	0.0003	0.0697	0.0003	0.0003	0.0397	0.0003	0.0609	0.0003	0.0003	0.0003	0.3322	0.0408	0.0003	0.0448
PDK1	0.0329	0.0003	0.1027	0.0003	0.0003	0.0003	0.0003	0.0003	0.0003	0.0003	0.0003	0.0003	0.0003	0.0003	0.0003	0.0003	0.0003
NUP205	0.0083	0.0876	0.0364	0.0039	0.0003	0.0137	0.0117	0.0003	0.0053	0.0003	0.0154	0.0003	0.0003	0.3447	0.0194	0.0148	0.1688
MYH4	0.0073	0.0003	0.089	0.0348	0.0051	0.0003	0.0088	0.0033	15.3779	0.0003	0.0008	0.0344	27.0764	0.0003	83.7267	38.7622	0.0003
RBCK1	0.042	0.0239	0.0702	0.0003	0.0003	0.0003	0.0003	0.0003	0.0003	0.0003	0.0003	0.0003	0.0003	0.0003	0.0003	0.1098	0.0003
NMT2	0.0003	0.0298	0.0879	0.0003	0.0189	0.0003	0.0003	0.0003	0.0082	0.0003	0.0003	0.0003	0.0003	0.0003	0.0003	0.0003	0.0003
PAK3	0.0751	0.0154	0.0461	0.0003	0.0003	0.0483	0.0003	0.0003	0.0003	0.0003	0.0003	0.0003	0.0003	0.0003	0.0003	0.0003	0.0003
DNASE1L3	0.0003	0.1368	0.0003	0.0003	0.0003	0.0003	0.0003	0.0003	0.0003	0.0003	0.0003	0.0003	0.0003	0.0003	0.0003	0.0003	0.0003
LRRC16A	0.1183	0.0131	0.0003	0.0003	0.006	0.0003	0.0003	0.0003	0.0003	0.0003	0.0003	0.0003	0.0003	0.0003	0.0003	0.0003	0.0165
MARK3	0.0003	0.1371	0.0003	0.0003	0.0003	0.0003	0.0003	0.0003	0.0003	0.0003	0.0003	0.0003	0.0003	0.0003	0.0003	0.0003	0.0003
MCEE	0.0003	0.1372	0.0003	0.0003	0.0003	0.0003	0.0003	0.0003	0.0003	0.0003	0.0003	0.0003	0.0003	0.0003	0.0003	0.0003	0.0003
KPNA5	0.0699	0.0003	0.0288	0.0166	0.0228	0.1308	0.0003	0.0148	0.0113	0.0003	0.0003	0.0003	0.0003	0.0003	0.0003	0.0003	0.0003
QKI	0.1137	0.0003	0.0238	0.0003	0.0003	0.3593	0.0883	0.0003	0.0003	0.0003	0.0003	0.6929	0.3492	0.4889	0.4507	1.1702	0.4755
ARHGEF2	0.0003	0.0003	0.0617	0.0271	0.0491	0.0003	0.0003	0.0003	0.0003	0.0003	0.0003	0.0131	0.0003	0.0003	0.0149	0.0003	0.331
CIB1	0.1377	0.0003	0.0003	0.0003	0.0003	0.0003	0.0003	0.0003	0.0003	0.0003	0.0003	0.0003	0.0003	0.0003	0.0003	0.0003	0.0003
STARD9	0.1375	0.0003	0.0006	0.0003	0.0003	0.0003	0.0003	0.0003	0.0003	0.0003	0.0003	0.0003	0.0003	0.0003	0.0003	0.0003	0.0282
C16orf62	0.0562	0.0003	0.0203	0.0003	0.0622	0.0227	0.0042	0.1941	0.0003	0.0003	0.0003	0.0003	0.0003	0.0003	0.125	0.1698	0.1743
MPDU1	0.0003	0.1385	0.0003	0.0003	0.0003	0.1705	0.0003	0.0003	0.0003	0.0003	0.0003	0.0003	0.0003	0.0003	0.0003	0.0003	0.0003
CDC42EP4	0.0003	0.0003	0.1386	0.0003	0.0003	0.0003	0.0003	0.0003	0.0003	0.0003	0.0003	0.0003	0.0003	0.0003	0.0003	0.0003	0.0003
PAK4	0.1386	0.0003	0.0003	0.0003	0.0003	0.0003	0.0003	0.0003	0.0003	0.0003	0.0003	0.0003	0.0003	0.0003	0.0003	0.0003	0.0003
WDR24	0.0003	0.1178	0.0003	0.0223	0.0003	0.0845	0.0003	0.0482	0.0003	0.0003	0.0003	0.0003	0.0003	0.0003	0.0003	0.0252	0.0003
MTX2	0.1402	0.0003	0.0003	0.0003	0.0003	0.0003	0.0003	0.0003	0.0003	0.0003	0.0003	0.0003	0.0003	0.0003	0.0003	0.0003	0.0003
TANC2	0.0003	0.1402	0.0003	0.0003	0.0003	0.0003	0.0003	0.0003	0.0003	0.0003	0.0003	0.0003	0.0003	0.0003	0.0003	0.0003	0.0003
TBCEL	0.0003	0.0003	0.0457	0.0003	0.0948	0.0003	0.0874	0.0003	0.0003	0.0003	0.0003	0.0003	0.0003	0.0003	0.0553	0.0003	0.1195
CELF1	0.1404	0.0003	0.0003	0.0003	0.0003	0.0003	0.0003	0.0003	0.0003	0.0003	0.0003	0.0003	0.0003	0.0003	0.0003	0.0003	0.0003
PNPLA6	0.0003	0.0215	0.1078	0.0003	0.0117	0.0003	0.0054	0.0941	0.0003	0.0003	0.0003	0.0003	0.0003	0.0003	0.033	0.0003	0.0962
TNS3	0.0201	0.0003	0.1071	0.0003	0.0138	0.0003	0.0215	0.0057	0.0003	0.0003	0.0003	0.0003	0.0003	0.022	0.0312	0.3027	0.0774
PROC	0.0003	0.0003	0.0003	0.0808	0.0603	0.1625	0.0003	0.0352	0.0339	0.0003	0.0353	0.1007	0.0003	0.1078	0.0003	0.0003	0.0617
TRRAP	0.0003	0.0003	0.141	0.0003	0.0003	0.0003	0.0003	0.0003	0.0003	0.0003	0.0003	0.0003	0.0003	0.0003	0.0003	0.0003	0.0049
SLC30A7	0.1416	0.0003	0.0003	0.0003	0.0003	0.0003	0.0003	0.0003	0.0003	0.0003	0.0003	0.0003	0.0003	0.0003	0.0003	0.0003	0.0003
ARL15	0.0003	0.0003	0.0003	0.0003	0.1417	0.0003	0.0003	0.0003	0.0003	0.0003	0.0003	0.0003	0.0003	0.0003	0.0003	0.0003	0.0003
CPVL	0.0828	0.0599	0.0003	0.0003	0.0003	0.0003	0.0003	0.0003	0.0003	0.0003	0.0003	0.0345	0.0752	0.0003	0.0414	0.0003	0.0003
REEP4	0.1432	0.0003	0.0003	0.0003	0.0003	0.0003	0.0003	0.0003	0.0003	0.0003	0.0003	0.0003	0.0003	0.0003	0.0003	0.0003	0.0003
CCDC127	0.0003	0.0003	0.1435	0.0003	0.0003	0.0003	0.0003	0.0003	0.0003	0.0003	0.0003	0.0003	0.0003	0.0003	0.0003	0.0003	0.0003
MRPS23	0.1435	0.0003	0.0003	0.0003	0.0003	0.0003	0.0003	0.0003	0.0003	0.0003	0.0003	0.0003	0.0003	0.0003	0.0003	0.0003	0.0003
GFPT2	0.1353	0.0087	0.0003	0.0003	0.0003	0.0003	0.0003	0.0003	0.0003	0.0003	0.0003	0.0003	0.0003	0.0003	0.0003	0.0003	0.0003
CDK4	0.0003	0.0003	0.1438	0.0003	0.0003	0.0003	0.145	0.1134	0.0003	0.0003	0.0003	0.0003	0.0003	0.0003	0.1401	0.0003	0.1752
CLPP	0.1439	0.0003	0.0003	0.0003	0.0003	0.0003	0.0003	0.0003	0.0003	0.0003	0.0003	0.0003	0.0003	0.0003	0.0003	0.0003	0.0003
PAPSS1	0.1445	0.0003	0.0003	0.0003	0.0003	0.0848	0.0003	0.0003	0.0003	0.0003	0.0003	0.0003	0.0003	0.0594	0.0003	0.0502	0.0003
STAG1	0.0428	0.0313	0.0571	0.0003	0.0144	0.1336	0.0261	0.0003	0.0003	0.061	0.0003	0.0133	0.0003	0.0161	0.0308	0.0317	0.0507
C7orf50	0.1449	0.0003	0.0003	0.0003	0.0003	0.0003	0.0003	0.0003	0.0003	0.0003	0.0003	0.0003	0.0003	0.0003	0.0003	0.0003	0.0003
DNAJC19	0.1449	0.0003	0.0003	0.0003	0.0003	0.0003	0.0003	0.0003	0.0003	0.0003	0.0003	0.0003	0.0003	0.0003	0.0003	0.0003	0.0003
ANGPTL4	0.0003	0.0003	0.145	0.0003	0.0003	0.0003	0.0003	0.0003	0.0003	0.0003	0.0003	0.0003	0.0003	0.0003	0.0003	0.0003	0.0003
LIMCH1	0.0003	0.0003	0.0824	0.0155	0.048	0.0281	0.0127	0.0146	0.0108	0.0003	0.0248	0.0003	0.0003	0.0003	0.1869	0.0003	0.0003
IDH3B	0.1167	0.029	0.0003	0.0003	0.0003	0.0003	0.0003	0.0003	0.0003	0.0003	0.0003	0.0003	0.0003	0.0003	0.0003	0.0003	0.0003
PRNP	0.1454	0.0003	0.0003	0.0003	0.0003	0.0003	0.0003	0.0003	0.0003	0.0003	0.0003	0.0003	0.0003	0.0003	0.8236	0.0003	0.0003
GAN	0.1034	0.0261	0.0166	0.0003	0.0003	0.0003	0.0003	0.0003	0.0003	0.0003	0.0003	0.0003	0.0003	0.0003	0.0003	0.0003	0.0003
SEC14L2	0.1455	0.0003	0.0003	0.0003	0.0003	0.0003	0.0003	0.0003	0.0003	0.0003	0.0003	0.0003	0.0003	0.0003	0.0003	0.0003	0.0003
CDC42BPG	0.0342	0.0181	0.0941	0.0003	0.0003	0.0003	0.0606	0.0003	0.0003	0.0003	0.0003	0.0003	0.0003	0.0003	0.0003	0.0003	0.0003
PRPF31	0.0677	0.0786	0.0003	0.0003	0.0003	0.0003	0.0003	0.0003	0.0003	0.0003	0.0003	0.0003	0.0003	0.0003	0.0003	0.0003	0.0003
ARID3B	0.0003	0.0761	0.0003	0.0702	0.0003	0.0003	0.0003	0.0003	0.0003	0.0003	0.0003	0.0003	0.3248	0.5228	0.0003	0.0003	0.0003
PTRH2	0.0003	0.0003	0.0003	0.1462	0.0003	0.0003	0.0003	0.0003	0.0003	0.0003	0.0003	0.0003	0.0003	0.0003	0.0003	0.0003	0.5432
FADD	0.0003	0.1464	0.0003	0.0003	0.0003	0.0003	0.0003	0.0003	0.0003	0.0003	0.0003	0.0003	0.0003	0.0003	0.0003	0.0003	0.0003
YTHDF3	0.1465	0.0003	0.0003	0.0003	0.0003	0.0003	0.0003	0.0003	0.0003	0.0003	0.0003	0.0003	0.0003	0.0003	0.0003	0.0003	0.0003
EHHADH	0.1467	0.0003	0.0003	0.0003	0.0003	0.0003	0.0003	0.0003	0.0003	0.0003	0.0003	0.0003	0.0003	0.0003	0.0003	0.0003	0.0003
DNAJA3	0.0255	0.0499	0.0722	0.0003	0.0003	0.0003	0.0281	0.0003	0.0003	0.0003	0.0003	0.0003	0.0003	0.0003	0.0003	0.0003	0.0003
TATDN1	0.0003	0.0628	0.0003	0.0846	0.0003	0.14	0.0003	0.0003	0.0003	0.0003	0.0003	0.0003	0.0003	0.0003	0.1459	0.0003	0.0003
HSPB2	0.0003	0.0003	0.0003	0.1471	0.0003	0.0003	0.0003	0.0003	0.6138	0.0003	0.0003	0.0003	2.0675	0.0003	11.156	2.0164	0.0003
TIMMDC1	0.1476	0.0003	0.0003	0.0003	0.0003	0.0003	0.0003	0.0003	0.0003	0.0003	0.0003	0.0003	0.0003	0.0003	0.0003	0.0003	0.0003
PNKP	0.1094	0.0386	0.0003	0.0003	0.0003	0.0003	0.0003	0.0003	0.0003	0.0003	0.0003	0.0003	0.0003	0.0003	0.0003	0.0003	0.0716
RBPMS2	0.0003	0.0003	0.1196	0.0286	0.0003	0.0003	0.0869	0.044	0.0003	0.089	0.0585	0.0244	0.0003	0.0003	0.0003	0.0003	0.0003
APC2	0.148	0.0003	0.0003	0.0003	0.0003	0.0003	0.0003	0.0003	0.0003	0.0003	0.0003	0.0003	0.0003	0.0003	0.0003	0.0003	0.0003
ANK2	0.0186	0.0585	0.0159	0.0247	0.032	0.0516	0.0819	0.0003	0.0003	0.0453	0.0217	0.0119	0.0187	0.0003	0.0495	0.0302	0.0129
DCK	0.0003	0.1487	0.0003	0.0003	0.0003	0.0003	0.0003	0.0003	0.0003	0.0003	0.0003	0.0003	0.0003	0.0003	0.0003	0.0003	0.0003
ABCF2	0.1492	0.0003	0.0003	0.0003	0.0003	0.0003	0.0003	0.0003	0.1702	0.0003	0.0003	0.0003	0.0003	0.0003	3.0107	0.0003	0.0003
THOP1	0.1054	0.0445	0.0003	0.0003	0.0003	0.0003	0.0003	0.0003	0.0003	0.0443	0.0003	0.0003	0.0003	0.0003	0.019	0.025	0.0633
TMED3	0.1499	0.0003	0.0003	0.0003	0.0003	0.0003	0.0003	0.0003	0.0003	0.0003	0.0003	0.0003	0.0003	0.0003	0.0003	0.0003	0.0003
KIF13B	0.0775	0.0627	0.0106	0.0003	0.0003	0.0003	0.0003	0.0003	0.0003	0.0003	0.0069	0.0003	0.0003	0.0003	0.0003	0.0003	0.0003
MRPL45	0.1018	0.0488	0.0003	0.0003	0.0003	0.0003	0.0003	0.0003	0.0003	0.0003	0.0003	0.0003	0.0003	0.0003	0.0003	0.0003	0.0439
NCBP1	0.1305	0.0201	0.0003	0.0003	0.0003	0.0351	0.0003	0.0003	0.0003	0.0003	0.0003	0.0003	0.0003	0.0003	0.0154	0.0003	0.0003
CNOT3	0.0003	0.0003	0.0003	0.1507	0.0003	0.0003	0.0003	0.1826	0.0003	0.0003	0.0003	0.0003	0.0003	0.0003	0.2116	0.0003	0.0003
NUDT19	0.0003	0.1508	0.0003	0.0003	0.0003	0.0003	0.0003	0.0003	0.0003	0.0003	0.0003	0.0003	0.0003	0.4578	0.0003	0.0003	0.0003
ZNF205	0.0003	0.0003	0.1509	0.0003	0.0003	0.0003	0.0003	0.0003	0.0003	0.0003	0.0003	0.0003	0.0003	0.0003	0.0003	0.0003	0.0003
RANBP2	0.0781	0.0276	0.0335	0.0007	0.0122	0.0072	0.0006	0.0003	0.0003	0.0003	0.0003	0.0003	0.0003	0.0192	0.0016	0.0008	0.0106
EPN2	0.072	0.0246	0.0553	0.0003	0.0003	0.0003	0.0003	0.0003	0.0003	0.0003	0.0003	0.0003	0.0003	0.0003	0.0003	0.0003	0.0003
PLEKHF2	0.1513	0.0003	0.0003	0.0003	0.0003	0.0003	0.0003	0.0003	0.0003	0.0003	0.0003	0.0003	0.0003	0.0003	0.0003	0.0003	0.0003
ATAD3B	0.124	0.028	0.0003	0.0003	0.0003	0.0003	0.0003	0.0003	0.0003	0.0003	0.0003	0.0003	0.0003	0.0003	0.0003	0.0003	0.0003
JMJD7	0.0787	0.0745	0.0003	0.0003	0.0003	0.0003	0.0003	0.0003	0.0003	0.0003	0.0003	0.0003	0.0003	0.0003	0.0267	0.0191	0.0003
STX16	0.0003	0.046	0.0003	0.1076	0.0003	0.1529	0.0003	0.0003	0.0355	0.0003	0.1455	0.0003	0.1356	0.1308	0.1433	0.2334	0.1927
CGN	0.1418	0.013	0.0003	0.0003	0.0003	0.0003	0.0003	0.0003	0.0003	0.0003	0.0003	0.0003	0.0003	0.0003	0.0003	0.0003	0.0003
UNC119B	0.0312	0.035	0.0889	0.0003	0.0003	0.0003	0.0003	0.0003	0.0003	0.0003	0.0003	0.0003	0.0003	0.0003	0.0003	0.0003	0.0003
DIAPH2	0.0003	0.0863	0.0398	0.0234	0.0059	0.0003	0.0003	0.0612	0.0003	0.0003	0.0003	0.0003	0.0003	0.0003	0.0003	0.0003	0.0003
ANKRD13D	0.0187	0.0077	0.0908	0.0168	0.0223	0.0427	0.0409	0.0248	0.0133	0.0375	0.0003	0.0097	0.0003	0.0003	0.0128	0.0116	0.0177
FDFT1	0.1552	0.0003	0.0003	0.0003	0.0003	0.0003	0.0003	0.0003	0.0003	0.0003	0.0003	0.0003	0.0003	0.0003	0.0003	0.0003	0.0003
FBXO30	0.0003	0.0003	0.0003	0.0625	0.0931	0.0003	0.0003	0.0581	0.0003	0.0003	0.0003	0.0003	0.0003	0.0003	0.0003	0.0003	0.0003
FAM50B	0.1555	0.0003	0.0003	0.0003	0.0003	0.0003	0.0003	0.0003	0.0003	0.0003	0.0003	0.0003	0.0003	0.0003	0.0003	0.0003	0.0003
ACTR10	0.0003	0.0003	0.1068	0.0491	0.0003	0.0003	0.0003	0.063	0.0003	0.0003	0.0003	0.0003	0.0003	0.0003	0.0003	0.0749	0.0003
PKN2	0.1364	0.0003	0.0202	0.0003	0.0003	0.0003	0.0003	0.0003	0.0003	0.0003	0.0003	0.0003	0.0003	0.0003	0.0003	0.0003	0.0003
MOB4	0.0003	0.069	0.0003	0.0882	0.0003	0.0003	0.0506	0.0003	0.0003	0.0003	0.0003	0.0003	0.0003	0.0003	0.0003	0.0003	0.0003
PPP6R3	0.0582	0.0403	0.027	0.0003	0.0324	0.0003	0.0003	0.0003	0.0003	0.0003	0.0003	0.0003	0.0003	0.0003	0.0003	0.0003	0.0003
EEFSEC	0.1577	0.0003	0.0003	0.0003	0.0003	0.0381	0.01	0.0003	0.0003	0.0003	0.0003	0.0003	0.0003	0.0003	0.0003	0.0003	0.0003
DDX60L	0.0003	0.0015	0.1571	0.0003	0.0003	0.0003	0.0003	0.0003	0.0003	0.0003	0.0003	0.0003	0.0003	0.0003	0.0003	0.0003	0.0003
PKP2	0.1583	0.0003	0.0003	0.0003	0.0003	0.0003	0.0003	0.0003	0.0003	0.0003	0.0003	0.0003	0.0003	0.0003	0.0003	0.0003	0.0003
PELO	0.1584	0.0003	0.0003	0.0003	0.0003	0.0003	0.0003	0.0003	0.0003	0.0003	0.0003	0.0003	0.0003	0.0003	0.0189	0.0003	0.0003
MFF	0.0003	0.112	0.0467	0.0003	0.0003	0.0727	0.0003	0.0623	0.0348	0.0576	0.0003	0.0003	0.0003	0.2651	0.0003	0.0702	0.1367
CD68	0.0003	0.1586	0.0003	0.0003	0.0003	0.0003	0.0003	0.0003	0.0003	0.0003	0.0003	0.0003	0.0003	0.0003	0.0003	0.0003	0.0003
DNAJB5	0.0003	0.0003	0.1587	0.0003	0.0003	0.0003	0.061	0.0453	0.0003	0.0003	0.0003	0.0003	0.0003	0.0003	0.0003	0.0003	0.0003
RAB7L1	0.0925	0.0518	0.0003	0.015	0.0003	0.0003	0.0003	0.0003	0.0003	0.0003	0.0003	0.0003	0.0003	0.0003	0.0003	0.105	0.0977
DOCK1	0.0316	0.0524	0.0438	0.0124	0.0199	0.0304	0.0103	0.0087	0.0107	0.0204	0.0225	0.0181	0.0153	0.0172	0.027	0.0455	0.0567
MRPS25	0.1591	0.0003	0.0003	0.0003	0.0003	0.0003	0.0003	0.0003	0.0003	0.0003	0.0003	0.0003	0.0003	0.0003	0.0003	0.0003	0.0003
OSBP2	0.0003	0.037	0.0003	0.0003	0.1225	0.0003	0.0003	0.0369	0.0003	0.0003	0.0003	0.0003	0.0003	0.0003	0.0003	0.0003	0.0003
PNPT1	0.0796	0.0105	0.0003	0.0261	0.0439	0.0003	0.0146	0.0003	0.0003	0.0003	0.0146	0.0244	0.0088	0.0274	0.1233	0.0408	0.0413
FBXO22	0.0979	0.0618	0.0003	0.0003	0.0003	0.0003	0.0003	0.0003	0.0003	0.0003	0.0003	0.0003	0.0003	0.0003	0.0003	0.0003	0.0003
MASP1	0.0003	0.0003	0.0003	0.0003	0.1596	0.0003	0.0003	0.1149	0.0003	0.0003	0.1306	0.0658	0.0003	0.0003	0.0869	0.0003	0.0003
RING1	0.0591	0.1009	0.0003	0.0003	0.0003	0.0003	0.0003	0.0003	0.0003	0.0003	0.0003	0.0003	0.0003	0.0003	0.0003	0.0003	0.162
RNF2	0.0591	0.1009	0.0003	0.0003	0.0003	0.0003	0.0003	0.0003	0.0003	0.0003	0.0003	0.0003	0.0003	0.0003	0.0003	0.0003	0.162
SUOX	0.1179	0.0003	0.0426	0.0003	0.0003	0.0186	0.0003	0.0003	0.0003	0.0003	0.0003	0.0003	0.0003	0.0003	0.0003	0.0003	0.0003
AARS2	0.1441	0.0168	0.0003	0.0003	0.0003	0.0003	0.0003	0.0003	0.0003	0.0003	0.0003	0.0003	0.0003	0.0003	0.0003	0.0003	0.0003
NAP1L3	0.0003	0.0003	0.1614	0.0003	0.0003	0.0003	0.0003	0.0003	0.0003	0.0003	0.0003	0.0003	0.0003	0.0003	0.0003	0.0003	0.0003
MEST	0.0003	0.0003	0.1614	0.0003	0.0003	0.0003	0.0003	0.0003	0.0003	0.1423	0.0003	0.0003	0.0003	0.0003	0.0609	0.0003	0.0003
UBAC1	0.0003	0.0461	0.0794	0.0003	0.0367	0.0003	0.0003	0.0003	0.0003	0.0003	0.0003	0.0003	0.0003	0.0003	0.0003	0.0003	0.0003
KIAA0825	0.0003	0.0003	0.0003	0.0003	0.1621	0.0003	0.0003	0.0003	0.0003	0.0003	0.0003	0.0003	0.0003	0.0003	0.0003	0.0003	0.0003
GGACT	0.0003	0.0919	0.0003	0.0707	0.0003	0.1528	0.0003	0.0003	0.0955	0.0003	0.0003	0.0003	0.0003	0.0003	0.0003	0.0003	0.0003
C6orf211	0.0003	0.1628	0.0003	0.0003	0.0003	0.4057	0.131	0.407	0.0003	0.0003	0.0003	0.0003	0.0003	0.0003	0.0003	0.0003	0.0003
XPC	0.0003	0.0714	0.068	0.0247	0.0003	0.0214	0.0003	0.0299	0.0003	0.0003	0.0003	0.0003	0.0003	0.0003	0.0003	0.0003	0.0565
HDAC6	0.1011	0.0352	0.0282	0.0003	0.0003	0.0003	0.0003	0.0003	0.0149	0.0003	0.0003	0.0003	0.0242	0.0003	0.029	0.0003	0.0611
KLK11	0.1642	0.0003	0.0003	0.0003	0.0003	0.0003	0.0003	0.0003	0.0003	0.0003	0.0003	0.0003	0.0003	0.0003	0.0003	0.0003	0.0003
FAM50A	0.1652	0.0003	0.0003	0.0003	0.0003	0.0003	0.0003	0.0003	0.0003	0.0003	0.0003	0.0003	0.0003	0.0003	0.0003	0.0003	0.0003
PIGR	0.0003	0.1657	0.0003	0.0003	0.0003	0.0003	0.0003	0.0207	0.0003	0.0003	0.0003	0.0003	0.0003	0.2875	0.0228	0.0003	0.0272
SKIV2L2	0.1616	0.0051	0.0003	0.0003	0.0003	0.0003	0.0003	0.0003	0.0003	0.0003	0.0003	0.0003	0.0003	0.0242	0.0003	0.0374	0.0235
VPS51	0.0266	0.0363	0.0429	0.0185	0.0437	0.0395	0.0121	0.0003	0.0003	0.0473	0.0003	0.0003	0.0003	0.0003	0.0269	0.0003	0.0003
WRNIP1	0.0003	0.107	0.0003	0.0287	0.0323	0.0003	0.0003	0.0003	0.0003	0.0003	0.0003	0.0003	0.0003	0.0434	0.0003	0.0003	0.0003
PHLDA2	0.168	0.0003	0.0003	0.0003	0.0003	0.0003	0.0003	0.0003	0.0003	0.0003	0.0003	0.0003	0.0003	0.0003	0.0003	0.0003	0.0003
AUP1	0.097	0.0719	0.0003	0.0003	0.0003	0.0003	0.0003	0.0003	0.0003	0.0003	0.0003	0.0003	0.0003	0.0003	0.0003	0.0003	0.0003
C15orf38-AP3S2	0.1274	0.0003	0.0418	0.0003	0.0003	0.0003	0.0003	0.1322	0.0003	0.0003	0.0003	0.0003	0.0003	0.0003	0.0003	0.0003	0.0003
STXBP1	0.0003	0.0003	0.077	0.0261	0.0666	0.0003	0.0268	0.0385	0.0003	0.0003	0.0604	0.0003	0.0003	0.0003	0.0003	0.0003	0.0003
TMED7-TICAM2	0.111	0.0003	0.0586	0.0003	0.0003	0.0753	0.0003	0.0003	0.0003	0.0003	0.0003	0.0003	0.0003	0.0003	0.0003	0.0003	0.0003
LMO7	0.156	0.0144	0.0003	0.0003	0.0003	0.0003	0.0003	0.0003	0.0003	0.0359	0.0003	0.0003	0.0003	0.0003	0.0725	0.0003	0.0003
SNAP29	0.1029	0.0003	0.0003	0.0003	0.0678	0.0943	0.0003	0.0003	0.0003	0.0003	0.0753	0.0003	0.0003	0.0003	0.0003	0.0522	0.0003
NDRG3	0.1705	0.0003	0.0003	0.0003	0.0003	0.0003	0.0003	0.0003	0.0003	0.0003	0.0003	0.0003	0.0003	0.0003	0.0003	0.0003	0.0003
MRPL37	0.1706	0.0003	0.0003	0.0003	0.0003	0.0003	0.0003	0.0003	0.0003	0.0003	0.0003	0.0003	0.0003	0.0003	0.0003	0.0003	0.0003
ARHGEF17	0.0003	0.0003	0.0469	0.036	0.0886	0.0003	0.0134	0.0045	0.0003	0.0003	0.0003	0.015	0.0003	0.0003	0.0003	0.0003	0.0113
TNIK	0.09	0.0189	0.0201	0.0143	0.0288	0.0232	0.0193	0.0003	0.0114	0.0159	0.0128	0.0414	0.0161	0.0311	0.0256	0.0394	0.1152
DYNLL2	0.0003	0.0003	0.0576	0.0003	0.1138	0.0003	0.0003	0.1033	0.0003	0.0003	0.0003	0.0003	0.0003	0.0003	0.0003	0.0003	0.0003
NR2C2AP	0.0003	0.0003	0.1712	0.0003	0.0003	0.1708	0.0003	0.0003	0.0003	0.1784	0.0003	0.0003	0.0003	0.0003	0.1368	0.1545	0.1284
STAM2	0.0967	0.0749	0.0003	0.0003	0.0003	0.0003	0.0003	0.0003	0.0003	0.0003	0.0003	0.0003	0.0003	0.0003	0.0003	0.0003	0.0003
FLJ44635	0.1023	0.0003	0.0693	0.0003	0.0003	0.0003	0.0225	0.0003	0.0003	0.0003	0.0003	0.0003	0.0003	0.0003	0.0003	0.0003	0.0003
MAP3K3	0.172	0.0003	0.0003	0.0003	0.0003	0.0003	0.0003	0.0003	0.0003	0.0003	0.0003	0.0003	0.0003	0.0003	0.0003	0.0003	0.0003
DDX4	0.1723	0.0003	0.0003	0.0003	0.0003	0.0003	0.0003	0.0003	0.0003	0.0003	0.0003	0.0003	0.0003	0.0003	0.0003	0.0003	0.0003
[truncated: 3,743 more rows]
