# Supplementary material for: Comprehensive proteomic characterization of urethral stricture disease in the Chinese population
Source: Front Mol Biosci. 2024 Jul 26;11:1401970. doi: 10.3389/fmolb.2024.1401970 (PMC11310122; doi:10.3389/fmolb.2024.1401970)
Supplement: Supplementary file 2 [file Table3.XLSX]

## Sheet: Sheet1
Supplementary Table S3: The list of immune molecules from the Human Protein Atlas (HPA)
Symbol	Immune molecules
IL16	Interleukin
IL17D	Interleukin
IL18	Interleukin
IL1RAP	Interleukin
IL1RN	Interleukin
IL4I1	Interleukin
IL6ST	Interleukin
ILF2	Interleukin
ILF3	Interleukin
IFI16	Interferon
IFI35	Interferon
IFIT1	Interferon
IFIT5	Interferon
IFITM1	Interferon
IFITM3	Interferon
IFNAR1	Interferon
IFRD2	Interferon
EGFL8	Growth factor
EGFR	Growth factor
FGF2	Growth factor
FGF7	Growth factor
FGFBP1	Growth factor
HDGF	Growth factor
HDGFRP2	Growth factor
HDGFRP3	Growth factor
HGF	Growth factor
HGFAC	Growth factor
IGF2BP2	Growth factor
IGF2R	Growth factor
IGFALS	Growth factor
IGFBP5	Growth factor
IGFBP6	Growth factor
IGFBP7	Growth factor
MEGF6	Growth factor
OGFR	Growth factor
PDGFD	Growth factor
PDGFRA	Growth factor
PDGFRB	Growth factor
PDGFRL	Growth factor
TGFB1I1	Growth factor
TGFBI	Growth factor
TGFBR3	Growth factor
ITGA1	Integrin
ITGA11	Integrin
ITGA2	Integrin
ITGA2B	Integrin
ITGA3	Integrin
ITGA5	Integrin
ITGA6	Integrin
ITGA7	Integrin
ITGA8	Integrin
ITGA9	Integrin
ITGAM	Integrin
ITGAV	Integrin
ITGAX	Integrin
ITGB1	Integrin
ITGB2	Integrin
ITGB3	Integrin
ITGB4	Integrin
ITGB5	Integrin
ITGB7	Integrin
CD109	Cluster of differentiation
CD14	Cluster of differentiation
CD163	Cluster of differentiation
CD248	Cluster of differentiation
CD276	Cluster of differentiation
CD36	Cluster of differentiation
CD37	Cluster of differentiation
CD44	Cluster of differentiation
CD47	Cluster of differentiation
CD55	Cluster of differentiation
CD59	Cluster of differentiation
CD63	Cluster of differentiation
CD68	Cluster of differentiation
CD70	Cluster of differentiation
CD74	Cluster of differentiation
CD81	Cluster of differentiation
CD82	Cluster of differentiation
CD9	Cluster of differentiation
CD93	Cluster of differentiation
CD97	Cluster of differentiation
MMP10	Matrix metalloproteinase
MMP12	Matrix metalloproteinase
MMP14	Matrix metalloproteinase
MMP19	Matrix metalloproteinase
MMP2	Matrix metalloproteinase
MMP23B	Matrix metalloproteinase
MMP28	Matrix metalloproteinase
MMP3	Matrix metalloproteinase
MMP9	Matrix metalloproteinase
C1QB	Complement system
C1QBP	Complement system
C1QC	Complement system
C1R	Complement system
C1RL	Complement system
C2	Complement system
C3	Complement system
C4A	Complement system
C4B	Complement system
C4B_2	Complement system
C4BPA	Complement system
C5	Complement system
C6	Complement system
C7	Complement system
C8A	Complement system
C8G	Complement system
C9	Complement system
CFB	Complement system
CFH	Complement system
CFI	Complement system
FCN1	Complement system
FCN3	Complement system
MASP1	Complement system
SERPING1	Complement system
CXCL12	Chemokine
TNFSF12-TNFSF13	Tumor necrosis factor
TNFSF13	Tumor necrosis factor
CSF1R	Colony Stimulating Factor
