# Supplementary material for: Comprehensive proteomic characterization of urethral stricture disease in the Chinese population
Source: Front Mol Biosci. 2024 Jul 26;11:1401970. doi: 10.3389/fmolb.2024.1401970 (PMC11310122; doi:10.3389/fmolb.2024.1401970)
Supplement: Supplementary file 6 [file Table1.XLSX]

## Sheet: Sheet1
Supplementary Table S1: The clinical information of USD patients.
Case No.	Gender	Age	HPI (history of present illness)	Samples for proteomics analyses
01	male	50	post-traumatic urethral stricture	NATs, Scar tissues
02	male	19	post-traumatic urethral stricture	Scar tissues
03	male	76	post-traumatic urethral stricture	NATs, Scar tissues
04	male	23	post-traumatic urethral stricture	Scar tissues
05	male	56	post-traumatic urethral stricture	NATs, Scar tissues
06	male	58	post-traumatic urethral stricture	Scar tissues
07	male	40	post-traumatic urethral stricture	NATs, Scar tissues
08	male	56	post-traumatic urethral stricture	Scar tissues
09	male	29	post-traumatic urethral stricture	Scar tissues
10	male	28	post-traumatic urethral stricture	Scar tissues
11	male	57	post-traumatic urethral stricture	Scar tissues
12	male	26	Sudden inability to urinate	NATs, Scar tissues
